# Supplementary material for: Improved annotation through genome-scale metabolic modeling of Aspergillus oryzae
Source: PubMed Central journal article supplement (PMC2413144; doi:10.1186/1471-2164-9-245), 2008-05-23
Supplement: 1471-2164-9-245-S4.pdf [file 1471-2164-9-245-S4.pdf]

A reconstructed metabolic network of  
*Aspergillus oryzae*

Additional file 4

## List of Supplementary Tables

|                                                                       |     |
|-----------------------------------------------------------------------|-----|
| 1. A reconstructed metabolic network of <i>A. oryzae</i>              | 3   |
| 2. List of metabolite abbreviations in <i>A. oryzae</i> model         | 97  |
| 3. Macromolecular composition (Biomass formation) of <i>A. oryzae</i> | 118 |
| 4. Protein composition of <i>A. oryzae</i>                            | 119 |
| 5. DNA composition of <i>A. oryzae</i>                                | 120 |
| 6. RNA composition of <i>A. oryzae</i>                                | 121 |
| 7. Lipid composition of <i>A. oryzae</i>                              | 122 |
| 8. Triacylglycerol composition of <i>A. oryzae</i>                    | 123 |
| 9. Phospholipid composition of <i>A. oryzae</i> .                     | 124 |
| 10. Free fatty acid composition of <i>A. oryzae</i>                   | 125 |

|                   |     |
|-------------------|-----|
| <b>References</b> | 126 |
|-------------------|-----|

**Suppl. Table 1: A reconstructed metabolic network of *A. oryzae***

Description: Suppl. Table 1 contains the reconstructed metabolic network of *A. oryzae*. The details are described by gene name (Column1), enzyme name (Column 2), EC number (Column3) and biochemical reaction (Column4). The last column named “Annotation method” shows which strategy used for improved annotation in each gene list. Abbreviations of the names of the metabolites are found in Suppl. Table 2.

**Suppl. Table 1 A reconstructed metabolic network of *A. oryzae*.**

| Gene name                           | Enzyme name                              | EC number | Biochemical reaction             | Annotation method |
|-------------------------------------|------------------------------------------|-----------|----------------------------------|-------------------|
| <b># 1. Carbohydrate metabolism</b> |                                          |           |                                  |                   |
| <b># Glucose conversion</b>         |                                          |           |                                  |                   |
| No_Gene                             | Spontaneous conversion                   | No_EC     | DGLCe <-> 1/3 GLCe + 2/3 bDGLCe  | NONE              |
| No_Gene                             | Spontaneous conversion                   | No_EC     | DGLC <-> 1/3 GLC + 2/3 bDGLC     | NONE              |
| AO09002000042                       | Aldose 1-epimerase                       | 5.1.3.3   | GLC <-> bDGLC                    | BLASTP            |
| AO090012000809                      | Aldose 1-epimerase                       | 5.1.3.3   | GLC <-> bDGLC                    | BLASTP            |
| AO090023000671                      | Aldose 1-epimerase                       | 5.1.3.3   | GLC <-> bDGLC                    | BLASTP            |
| <b># Glycolysis/Gluconeogenesis</b> |                                          |           |                                  |                   |
| AO090001000710                      | Hexokinase                               | 2.7.1.1   | ATP + GLC -> ADP + G6P           | BLASTP            |
| AO090005000083                      | Hexokinase                               | 2.7.1.1   | ATP + GLC -> ADP + G6P           | BLASTP            |
| AO090012000259                      | Hexokinase                               | 2.7.1.1   | ATP + GLC -> ADP + G6P           | BLASTP            |
| AO090003001508                      | Hexokinase                               | 2.7.1.1   | ATP + GLC -> ADP + G6P           | BLASTP            |
| AO090005000003                      | Hexokinase                               | 2.7.1.1   | ATP + GLC -> ADP + G6P           | BLASTP            |
| AO090120000109                      | Glucokinase                              | 2.7.1.2   | ATP + bDGLC -> ADP + bDG6P       | BLASTP            |
| AO090113000120                      | Glucose-6-phosphatase                    | 3.1.3.9   | G6P + H2O -> GLC + PI            | BLASTP            |
| AO090113000120                      | Glucose-6-phosphatase                    | 3.1.3.9   | bDG6P + H2O -> bDGLC + PI        | BLASTP            |
| AO090011000659                      | Glucose-6-phosphate isomerase            | 5.3.1.9   | G6P <-> F6P                      | BLASTP            |
| AO090011000659                      | Glucose-6-phosphate isomerase            | 5.3.1.9   | bDG6P <-> F6P                    | BLASTP            |
| AO090011000659                      | Glucose-6-phosphate isomerase            | 5.3.1.9   | G6P <-> bDG6P                    | BLASTP            |
| AO090003001390                      | Phosphofructokinase                      | 2.7.1.11  | ATP + F6P -> ADP + FDP           | BLASTP            |
| AO090003000725                      | Fructose-bisphosphate aldolase           | 4.1.2.13  | FDP <-> T3P2 + T3P1              | BLASTP            |
| AO090010000514                      | Fructose-bisphosphate aldolase           | 4.1.2.13  | FDP <-> T3P2 + T3P1              | BLASTP            |
| AO090026000543                      | Triosephosphate isomerase                | 5.3.1.1   | T3P2 <-> T3P1                    | BLASTP            |
| AO090120000493                      | Triosephosphate isomerase                | 5.3.1.1   | T3P2 <-> T3P1                    | BLASTP            |
| AO090003001322                      | Glyceraldehyde-3-phosphate dehydrogenase | 1.2.1.12  | T3P1 + PI + NAD <-> 13PDG + NADH | BLASTP            |
| AO090020000265                      | Glyceraldehyde-3-phosphate dehydrogenase | 1.2.1.12  | T3P1 + PI + NAD <-> 13PDG + NADH | BLASTP            |
| AO090011000414                      | Glyceraldehyde-3-phosphate dehydrogenase | 1.2.1.12  | T3P1 + PI + NAD <-> 13PDG + NADH | BLASTP            |
| AO090038000395                      | Phosphoglycerate kinase                  | 2.7.2.3   | ADP + 13PDG <-> ATP + 3PG        | BLASTP            |
| AO090005001300                      | Phosphoglycerate mutase                  | 5.4.2.1   | 3PG <-> 2PG                      | BLASTP            |

| Gene name       | Enzyme name                             | EC number | Biochemical reaction                        | Annotation method |
|-----------------|-----------------------------------------|-----------|---------------------------------------------|-------------------|
| AO090120000145  | Phosphoglycerate mutase                 | 5.4.2.1   | 3PG <-> 2PG                                 | BLASTP            |
| AO090011000152  | Phosphoglycerate mutase                 | 5.4.2.1   | 3PG <-> 2PG                                 | BLASTP            |
| ZY077820        | Phosphoglycerate mutase                 | 5.4.2.1   | 3PG <-> 2PG                                 | EST               |
| AO090003000055  | Enolase                                 | 4.2.1.11  | 2PG <-> PEP + H2O                           | BLASTP            |
| AO090005001556  | Pyruvate kinase                         | 2.7.1.40  | ADP + PEP -> ATP + PYR                      | BLASTP            |
| AO090003001089  | Fructose-1,6-bisphosphatase             | 3.1.3.11  | FDP + H2O -> F6P + PI                       | BLASTP            |
| AO090003000174  | Phosphoenolpyruvate carboxykinase (ATP) | 4.1.1.49  | ATP + OA -> ADP + PEP + CO2                 | BLASTP            |
| AO090010000668  | NADP-dependent alcohol dehydrogenase    | 1.1.1.2   | ETH + NADP <-> ACAL + NADPH                 | BLASTP            |
| AO090005001358  | NADP-dependent alcohol dehydrogenase    | 1.1.1.2   | ETH + NADP <-> ACAL + NADPH                 | BLASTP            |
| AO090023000460  | NADP-dependent alcohol dehydrogenase    | 1.1.1.2   | ETH + NADP <-> ACAL + NADPH                 | BLASTP            |
| AO090003000751  | NADP-dependent alcohol dehydrogenase    | 1.1.1.2   | ETH + NADP <-> ACAL + NADPH                 | BLASTP            |
| AO090009000634  | NAD-dependent alcohol dehydrogenase     | 1.1.1.1   | ETH + NAD <-> ACAL + NADH                   | BLASTP            |
| AO090005000125  | NAD-dependent alcohol dehydrogenase     | 1.1.1.1   | ETH + NAD <-> ACAL + NADH                   | BLASTP            |
| AO090012000375  | NAD-dependent alcohol dehydrogenase     | 1.1.1.1   | ETH + NAD <-> ACAL + NADH                   | BLASTP            |
| AO090038000108  | NAD-dependent alcohol dehydrogenase     | 1.1.1.1   | ETH + NAD <-> ACAL + NADH                   | BLASTP            |
| AO090003001407  | NAD-dependent alcohol dehydrogenase     | 1.1.1.1   | ETH + NAD <-> ACAL + NADH                   | BLASTP            |
| AO090009000634  | NAD-dependent alcohol dehydrogenase     | 1.1.1.1   | ETHm + NADm <-> ACALm + NADHm               | BLASTP            |
| AO090005000125  | NAD-dependent alcohol dehydrogenase     | 1.1.1.1   | ETHm + NADm <-> ACALm + NADHm               | BLASTP            |
| AO090012000375  | NAD-dependent alcohol dehydrogenase     | 1.1.1.1   | ETHm + NADm <-> ACALm + NADHm               | BLASTP            |
| AO090038000108  | NAD-dependent alcohol dehydrogenase     | 1.1.1.1   | ETHm + NADm <-> ACALm + NADHm               | BLASTP            |
| AO090003001407  | NAD-dependent alcohol dehydrogenase     | 1.1.1.1   | ETHm + NADm <-> ACALm + NADHm               | BLASTP            |
| AO090003000290/ | Pyruvate dehydrogenase complex          | 1.2.4.1/  | PYRm + COAm + NADm -> ACCOAm + CO2m + NADHm | BLASTP            |
| AO090012000948/ |                                         | 2.3.1.12/ |                                             |                   |
| AO090124000079/ |                                         | 1.8.1.4   |                                             |                   |
| AO090005000436/ |                                         |           |                                             |                   |
| AO090005001450/ |                                         |           |                                             |                   |
| AO090011000486  |                                         |           |                                             |                   |

| Gene name                          | Enzyme name                                      | EC number | Biochemical reaction               | Annotation method |
|------------------------------------|--------------------------------------------------|-----------|------------------------------------|-------------------|
| <b># Pentose-phosphate pathway</b> |                                                  |           |                                    |                   |
| AO090005001427                     | Glucose-6-phosphate 1-dehydrogenase              | 1.1.1.49  | G6P + NADP -> D6PGL + NADPH        | BLASTP            |
| AO090005000789                     | 6-phosphogluconolactonase                        | 3.1.1.31  | D6PGL + H2O -> D6PGC               | BLASTP            |
| AO090003000121                     | Phosphogluconate dehydrogenase (decarboxylating) | 1.1.1.44  | D6PGC + NADP -> RL5P + CO2 + NADPH | BLASTP            |
| AO090001000547                     | Phosphogluconate dehydrogenase (decarboxylating) | 1.1.1.44  | D6PGC + NADP -> RL5P + CO2 + NADPH | BLASTP            |
| AO090012000303                     | Ribulose-phosphate 3-epimerase                   | 5.1.3.1   | RL5P <-> XUL5P                     | BLASTP            |
| AO090023000209                     | Ribose 5-phosphate isomerase                     | 5.3.1.6   | RL5P <-> R5P                       | BLASTP            |
| AO090012000526                     | Transketolase                                    | 2.2.1.1   | R5P + XUL5P <-> S7P + T3P1         | BLASTP            |
| AO090023000345                     | Transketolase                                    | 2.2.1.1   | R5P + XUL5P <-> S7P + T3P1         | BLASTP            |
| AO090001000322                     | Transketolase                                    | 2.2.1.1   | R5P + XUL5P <-> S7P + T3P1         | BLASTP            |
| AO090012000526                     | Transketolase                                    | 2.2.1.1   | E4P + XUL5P <-> F6P + T3P1         | BLASTP            |
| AO090023000345                     | Transketolase                                    | 2.2.1.1   | E4P + XUL5P <-> F6P + T3P1         | BLASTP            |
| AO090001000322                     | Transketolase                                    | 2.2.1.1   | E4P + XUL5P <-> F6P + T3P1         | BLASTP            |
| AO090020000520                     | Transaldolase                                    | 2.2.1.2   | S7P + T3P1 <-> E4P + F6P           | BLASTP            |
| AO090003000625                     | Xylulose-5-phosphate phosphoketolase             | 4.1.2.9   | XUL5P + PI <-> ACTP + T3P1 + H2O   | BLASTP            |
| GAP                                | Phosphopentomutase                               | 5.4.2.7   | DR1P -> DEORIP1                    | NONE              |
| AO090138000062                     | Deoxyribose-phosphate aldolase                   | 4.1.2.4   | DEORIP1 <-> T3P1 + ACAL            | BLASTP            |
| AO090020000341                     | Deoxyribose-phosphate aldolase                   | 4.1.2.4   | DEORIP1 <-> T3P1 + ACAL            | BLASTP            |
| AO090038000092                     | Ribokinase                                       | 2.7.1.15  | ATP + RIB -> ADP + R5P             | BLASTP            |
| AO090102000368                     | Ribokinase                                       | 2.7.1.15  | ATP + RIB -> ADP + R5P             | BLASTP            |
| AO090003001003                     | Gluconokinase                                    | 2.7.1.12  | GLCNT + ATP -> D6PGC + ADP         | BLASTP            |
| AO090003000746                     | Phosphoglucomutase                               | 5.4.2.2   | R5P <-> R1P                        | BLASTP            |
| AO090011000487                     | Phosphoglucomutase                               | 5.4.2.2   | R5P <-> R1P                        | BLASTP            |
| AO090001000101                     | Phosphoglucomutase                               | 5.4.2.2   | R5P <-> R1P                        | BLASTP            |
| AO090012000711                     | Fructose-6-phosphate phosphoketolase             | 4.1.2.22  | F6P + PI -> H2O + ACTP + E4P       | GFAOP             |
| AO090003000625                     | Fructose-6-phosphate phosphoketolase             | 4.1.2.22  | F6P + PI -> H2O + ACTP + E4P       | GFAOP             |

| Gene name                                                                                                                        | Enzyme name                                       | EC number                        | Biochemical reaction                                 | Annotation method |
|----------------------------------------------------------------------------------------------------------------------------------|---------------------------------------------------|----------------------------------|------------------------------------------------------|-------------------|
| <b># Tricarboxylic acid cycle and glyoxylate/Dicarboxylate metabolism</b>                                                        |                                                   |                                  |                                                      |                   |
| AO090010000170                                                                                                                   | Citrate synthase                                  | 2.3.3.1                          | ACCOAm + H2Om + OAm <-> CITm + COAm                  | BLASTP            |
| AO090012000318                                                                                                                   | Citrate synthase                                  | 2.3.3.1                          | ACCOAm + H2Om + OAm <-> CITm + COAm                  | BLASTP            |
| AO090102000627                                                                                                                   | Citrate synthase                                  | 2.3.3.1                          | ACCOAm + H2Om + OAm <-> CITm + COAm                  | BLASTP            |
| AO090005000045                                                                                                                   | Aconitate hydratase                               | 4.2.1.3                          | CITm <-> ACOm + H2Om                                 | BLASTP            |
| AO090001000484                                                                                                                   | Aconitate hydratase                               | 4.2.1.3                          | CITm <-> ACOm + H2Om                                 | BLASTP            |
| AO090001000642                                                                                                                   | Aconitate hydratase                               | 4.2.1.3                          | CITm <-> ACOm + H2Om                                 | BLASTP            |
| AO090003000415                                                                                                                   | Aconitate hydratase                               | 4.2.1.3                          | CITm <-> ACOm + H2Om                                 | BLASTP            |
| ZY085753                                                                                                                         | Aconitate hydratase                               | 4.2.1.3                          | CITm <-> ACOm + H2Om                                 | EST               |
| AO090005000045                                                                                                                   | Aconitate hydratase                               | 4.2.1.3                          | ACOm + H2Om <-> ICITm                                | BLASTP            |
| AO090001000484                                                                                                                   | Aconitate hydratase                               | 4.2.1.3                          | ACOm + H2Om <-> ICITm                                | BLASTP            |
| AO090001000484                                                                                                                   | Aconitate hydratase                               | 4.2.1.3                          | ACOm + H2Om <-> ICITm                                | BLASTP            |
| AO090003000415                                                                                                                   | Aconitate hydratase                               | 4.2.1.3                          | ACOm + H2Om <-> ICITm                                | BLASTP            |
| ZY085753                                                                                                                         | Aconitate hydratase                               | 4.2.1.3                          | ACOm + H2Om <-> ICITm                                | EST               |
| AO090003000008/<br>AO090012000629                                                                                                | NAD-dependent isocitrate dehydrogenase            | 1.1.1.41                         | ICITm + NADm -> AKGm + CO2m + NADHm                  | BLASTP            |
| AO090005001404                                                                                                                   | NADP-dependent isocitrate dehydrogenase           | 1.1.1.42                         | ICITm + NADPm -> AKGm + CO2m + NADPHm                | BLASTP            |
| AO090005001404                                                                                                                   | NADP-dependent isocitrate dehydrogenase           | 1.1.1.42                         | ICIT + NADP -> AKG + CO2 + NADPH                     | BLASTP            |
| AO090005001404                                                                                                                   | NADP-dependent isocitrate dehydrogenase           | 1.1.1.42                         | ICITp + NADPp -> AKGp + CO2p + NADPHp                | BLASTP            |
| AO090003001055/<br>AO090005001170/<br>AO090005001171/<br>AO090005001173/<br>AO090005001174/<br>AO090020000008/<br>AO090011000486 | Dihydrolipoamide S-succinyltransferase<br>complex | 1.2.4.2/<br>2.3.1.61/<br>1.8.1.4 | AKGm + NADm + COAm -> SUCCOAm + CO2m<br>+ NADHm + Hm | BLASTP            |
| AO090003000943                                                                                                                   | Succinyl-CoA:alpha-ketoacid-CoA transferase       | 2.8.3.5                          | SUCCOAm + ACTACm -> SUCCm + AACCOAm                  | GFAOP             |
| AO090009000195                                                                                                                   | Succinyl-CoA:alpha-ketoacid-CoA transferase       | 2.8.3.5                          | SUCCOAm + ACTACm -> SUCCm + AACCOAm                  | GFAOP             |
| AO090124000071                                                                                                                   | Succinyl-CoA:alpha-ketoacid-CoA transferase       | 2.8.3.5                          | SUCCOAm + ACTACm -> SUCCm + AACCOAm                  | GFAOP             |

| Gene name                                                                                                                 | Enzyme name                                                                          | EC number          | Biochemical reaction                                                       | Annotation method     |
|---------------------------------------------------------------------------------------------------------------------------|--------------------------------------------------------------------------------------|--------------------|----------------------------------------------------------------------------|-----------------------|
| AO090009000644                                                                                                            | Succinate-CoA ligase (GDP-forming)                                                   | 6.2.1.4            | GDPm + PIm + SUCCOAm <-> GTPm + SUCCm + COAm                               | BLASTP                |
| AO090038000330/<br>AO090206000040/<br>AO090023000354<br>AO090020000415/<br>AO090020000596/<br>AO090010000505/<br>ZY029275 | Succinate-CoA ligase (ADP-forming)<br>Succinate dehydrogenase (flavoprotein subunit) | 6.2.1.5<br>1.3.5.1 | ADPm + PIm + SUCCOAm <-> ATPm + SUCCm + COAm<br>SUCCm + Qm <-> FUMm + QH2m | BLASTP<br>EST, BLASTP |
| AO090003000831                                                                                                            | Fumarate reductase (flavoprotein subunit)                                            | 1.3.99.1           | FUM + FADH2m -> SUCC + FADm                                                | BLASTP                |
| AO090005000592                                                                                                            | Fumarate reductase (flavoprotein subunit)                                            | 1.3.99.1           | FUMm + FADH2m -> SUCCm + FADm                                              | BLASTP                |
| AO090120000133                                                                                                            | Fumarate hydratase                                                                   | 4.2.1.2            | FUMm + H2Om <-> MALm                                                       | BLASTP                |
| AO090005000438                                                                                                            | NAD-dependent malate dehydrogenase                                                   | 1.1.1.37           | MALm + NADm <-> OAm + NADHm                                                | BLASTP                |
| AO090701000013                                                                                                            | NAD-dependent malate dehydrogenase                                                   | 1.1.1.37           | MAL + NAD <-> OA + NADH                                                    | BLASTP                |
| AO090009000285                                                                                                            | Citrate lyase                                                                        | 4.1.3.6            | CIT <-> AC + OA                                                            | GFAOP                 |
| AO090023000205/<br>AO090023000206                                                                                         | ATP citrate synthase                                                                 | 2.3.3.8            | ATP + CIT + COA -> ADP + PI + ACCOA + OA                                   | BLASTP                |
| AO090009000557                                                                                                            | Malate synthase                                                                      | 2.3.3.9            | ACCOAp + H2Op + GLXp -> MALp + COAp                                        | BLASTP                |
| AO090009000219                                                                                                            | Isocitrate lyase                                                                     | 4.1.3.1            | ICITp -> GLXp + SUCCp                                                      | BLASTP                |
| AO090701000233                                                                                                            | Carboxyphosphoenolpyruvate phosphonmutase                                            | 3.7.1.1            | OA + H2O -> OXAL + AC                                                      | GFAOP                 |
| AO090701000316                                                                                                            | Carboxyphosphoenolpyruvate phosphonmutase                                            | 3.7.1.1            | OA + H2O -> OXAL + AC                                                      | GFAOP                 |
| AO090005001508                                                                                                            | Carboxyphosphoenolpyruvate phosphonmutase                                            | 3.7.1.1            | OA + H2O -> OXAL + AC                                                      | GFAOP                 |
| AO090005000078                                                                                                            | Oxalate decarboxylase                                                                | 4.1.1.2            | OXAL -> FOR + CO2                                                          | BLASTP                |
| AO090010000631                                                                                                            | Oxalate decarboxylase                                                                | 4.1.1.2            | OXAL -> FOR + CO2                                                          | BLASTP                |
| AO090011000368                                                                                                            | Glyoxylate reductase                                                                 | 1.1.1.79           | GLYCOLAp + NADPp -> GLXp + NADPHp                                          | BLASTP                |
| AO090003001032                                                                                                            | Glyoxylate reductase                                                                 | 1.1.1.79           | GLYCOLAp + NADPp -> GLXp + NADPHp                                          | BLASTP                |
| AO090023000508                                                                                                            | Glyoxylate reductase                                                                 | 1.1.1.79           | GLYCOLAp + NADPp -> GLXp + NADPHp                                          | BLASTP                |
| AO090010000085                                                                                                            | Glycolate oxidase                                                                    | 1.1.3.15           | GLYCOLAp + O2p -> GLXp + H2O2p                                             | GFAOP                 |
| AO090010000623                                                                                                            | Glycolate oxidase                                                                    | 1.1.3.15           | GLYCOLAp + O2p -> GLXp + H2O2p                                             | GFAOP                 |
| AO090138000044                                                                                                            | Glycolate oxidase                                                                    | 1.1.3.15           | GLYCOLAp + O2p -> GLXp + H2O2p                                             | GFAOP                 |
| AO090026000735                                                                                                            | Glycolate oxidase                                                                    | 1.1.3.15           | GLYCOLAp + O2p -> GLXp + H2O2p                                             | GFAOP                 |
| GAP                                                                                                                       | Glycolaldehyde dehydrogenase                                                         | 1.2.1.21           | GLALp + NADp + H2Op <-> GLYCOLAp + NADHp                                   | NONE                  |



| Gene name                    | Enzyme name                                | EC number | Biochemical reaction                      | Annotation method |
|------------------------------|--------------------------------------------|-----------|-------------------------------------------|-------------------|
| AO090012000231               | Hydroxypyruvate reductase                  | 1.1.1.29  | Gp + NADp <-> HPYRp + NADHp               | GFAOP             |
| AO090003000929               | Tartrate dehydrogenase                     | 1.1.1.93  | TAR + NAD <-> OXGLY + NADH                | BLASTP            |
| AO090020000210               | Tartrate dehydrogenase                     | 1.1.1.93  | TAR + NAD <-> OXGLY + NADH                | BLASTP            |
| GAP                          | Oxaloglycolate reductase (decarboxylating) | 1.1.1.92  | OXGLY + NAD -> G + CO2 + NADH             | NONE              |
| <b># Pyruvate metabolism</b> |                                            |           |                                           |                   |
| AO090003000661               | Pyruvate decarboxylase                     | 4.1.1.1   | PYR -> ACAL + CO2                         | BLASTP            |
| AO090012000752               | Pyruvate decarboxylase                     | 4.1.1.1   | PYR -> ACAL + CO2                         | BLASTP            |
| AO090010000261               | Pyruvate decarboxylase                     | 4.1.1.1   | PYR -> ACAL + CO2                         | BLASTP            |
| AO090011000272               | Pyruvate decarboxylase                     | 4.1.1.1   | PYR -> ACAL + CO2                         | BLASTP            |
| AO090124000047               | Pyruvate decarboxylase                     | 4.1.1.1   | PYR -> ACAL + CO2                         | BLASTP            |
| AO090701000373               | S-(hydroxymethyl)glutathione dehydrogenase | 1.1.1.284 | HYGTA + NAD -> FGT + NADH                 | BLASTP            |
| GAP                          | S-(hydroxymethyl)glutathione synthase      | 4.4.1.22  | FALD + RGT <-> HYGTA                      | NONE              |
| ZY097848                     | Methylglyoxal synthase                     | 4.2.3.3   | T3P2 -> MTHGXL + PI                       | EST               |
| AO090010000424               | NADP-dependent methylglyoxal reductase     | 1.1.1.283 | MTHGXL + NADPH <-> LACAL + NADP           | BLASTP            |
| AO090026000741               | Lactaldehyde dehydrogenase                 | 1.2.1.22  | LACAL + NAD + H2O -> LAC + NADH           | BLASTP            |
| AO090023000697               | Lactaldehyde dehydrogenase                 | 1.2.1.22  | LACAL + NAD + H2O -> LAC + NADH           | BLASTP            |
| AO090023000697               | Lactaldehyde dehydrogenase                 | 1.2.1.22  | LACALm + NADm + H2Om -> LACm + NADHm      | BLASTP            |
| AO090003000140               | Lactoylglutathione lyase                   | 4.4.1.5   | RGT + MTHGXL <-> LGT                      | BLASTP            |
| AO090026000258               | Lactoylglutathione lyase                   | 4.4.1.5   | RGT + MTHGXL <-> LGT                      | BLASTP            |
| AO090120000408               | Hydroxyacylglutathione hydrolase           | 3.1.2.6   | LGT + H2O -> LAC + RGT                    | BLASTP            |
| AO090003001112               | Acetyl-coenzyme A synthetase               | 6.2.1.1   | ATP + AC + COA -> AMP + PPI + ACCOA       | BLASTP            |
| AO090003001112               | Acetyl-coenzyme A synthetase               | 6.2.1.1   | ATPp + ACp + COAp -> AMPp + PPIp + ACCOAp | BLASTP            |
| AO090003001112               | Acetyl-coenzyme A synthetase               | 6.2.1.1   | ATPm + ACm + COAm -> AMPm + PPIm + ACCOAm | BLASTP            |
| AO090023000467               | NAD-dependent aldehyde dehydrogenase       | 1.2.1.3   | ACAL + NAD + H2O -> NADH + AC             | BLASTP            |
| AO090009000417               | NAD-dependent aldehyde dehydrogenase       | 1.2.1.3   | ACALm + NADm + H2Om -> NADHm + ACm        | BLASTP            |
| AO090009000417               | NAD-dependent aldehyde dehydrogenase       | 1.2.1.3   | ACAL + NAD + H2O -> NADH + AC             | BLASTP            |
| AO090001000162               | NAD-dependent aldehyde dehydrogenase       | 1.2.1.3   | ACAL + NAD + H2O -> NADH + AC             | BLASTP            |
| ZY087055                     | NAD-dependent aldehyde dehydrogenase       | 1.2.1.3   | ACAL + NAD + H2O -> NADH + AC             | EST               |
| AO090009000222               | NADP-dependent aldehyde dehydrogenase      | 1.2.1.5   | ACAL + NADP + H2O -> AC + NADPH           | BLASTP            |
| AO090005000588               | Acetyl-CoA hydrolase                       | 3.1.2.1   | ACCOA + H2O -> COA + AC                   | BLASTP            |
| AO090005000588               | Acetyl-CoA hydrolase                       | 3.1.2.1   | ACCOAm + H2Om -> COAm + ACm               | BLASTP            |

| Gene name                                         | Enzyme name                          | EC number | Biochemical reaction                    | Annotation method |
|---------------------------------------------------|--------------------------------------|-----------|-----------------------------------------|-------------------|
| AO090005000277                                    | Esterase                             | 3.1.2.12  | FGT + H2O <-> RGT + FOR                 | BLASTP            |
| AO090701000046/<br>AO090010000579                 | NAD-dependent formate dehydrogenase  | 1.2.1.2   | FOR + NAD -> CO2 + NADH                 | BLASTP            |
| AO090701000046/<br>AO090010000579                 | NAD-dependent formate dehydrogenase  | 1.2.1.2   | FORm + NADm -> CO2m + NADHm             | BLASTP            |
| AO090005000125                                    | NAD-dependent alcohol dehydrogenase  | 1.1.1.1   | METHOL + NAD <-> FALD + NADH            | BLASTP            |
| AO090012000375                                    | NAD-dependent alcohol dehydrogenase  | 1.1.1.1   | METHOL + NAD <-> FALD + NADH            | BLASTP            |
| AO090009000634                                    | NAD-dependent alcohol dehydrogenase  | 1.1.1.1   | METHOL + NAD <-> FALD + NADH            | BLASTP            |
| AO090038000108                                    | NAD-dependent alcohol dehydrogenase  | 1.1.1.1   | METHOL + NAD <-> FALD + NADH            | BLASTP            |
| AO090003001407                                    | NAD-dependent alcohol dehydrogenase  | 1.1.1.1   | METHOL + NAD <-> FALD + NADH            | BLASTP            |
| AO090023000801                                    | Pyruvate carboxylase                 | 6.4.1.1   | ATP + PYR + HCO3 -> ADP + PI + OA       | BLASTP            |
| AO090701000666                                    | Pyruvate carboxylase                 | 6.4.1.1   | ATPm + PYRm + HCO3m -> ADPm + PIm + OAm | BLASTP            |
| AO090011000876                                    | NADP-dependent malic enzyme          | 1.1.1.40  | MALm + NADPm -> PYRm + CO2m + NADPHm    | BLASTP            |
| AO090038000621                                    | NADP-dependent malic enzyme          | 1.1.1.40  | MAL + NADP -> PYR + CO2 + NADPH         | BLASTP            |
| AO090038000621                                    | NADP-dependent malic enzyme          | 1.1.1.38  | MAL + NAD -> PYR + CO2 + NADH           | BLASTP            |
| AO090003000624                                    | Acetate kinase                       | 2.7.2.1   | ADPm + ACTPm <-> ATPm + ACm             | BLASTP            |
| AO090023000577                                    | D-lactate dehydrogenase              | 1.1.1.28  | PYR + NADH <-> LAC + NAD                | BLASTP            |
| AO090023000871                                    | L-lactate dehydrogenase              | 1.1.1.27  | LLAC + NAD -> PYR + NADH                | BLASTP            |
| AO090102000252                                    | Lactic acid dehydrogenase            | 1.1.2.3   | 2 FERIm + LLACm -> PYRm + 2 FEROm       | BLASTP            |
| AO090003001006                                    | D-Lactate dehydrogenase (cytochrome) | 1.1.2.4   | 2 FERIm + LACm -> PYRm + 2 FEROm        | BLASTP            |
| AO090010000369                                    | D-Lactate dehydrogenase (cytochrome) | 1.1.2.4   | 2 FERIm + LACm -> PYRm + 2 FEROm        | BLASTP            |
| AO090038000632                                    | D-Lactate dehydrogenase (cytochrome) | 1.1.2.4   | 2 FERIm + LACm -> PYRm + 2 FEROm        | BLASTP            |
| AO090020000315                                    | D-Lactate dehydrogenase (cytochrome) | 1.1.2.4   | 2 FERIm + LACm -> PYRm + 2 FEROm        | BLASTP            |
| <b># Pentose and glucuronate interconversions</b> |                                      |           |                                         |                   |
| AO090005000972                                    | UDP-glucose dehydrogenase            | 1.1.1.22  | UDPG + 2 NAD + H2O -> UDPGE + 2 NADH    | BLASTP            |
| AO090020000680                                    | UDP-glucuronosyltransferase          | 2.4.1.17  | UDPGE + H2O -> UDP + GLUCRE             | GFAOP             |
| AO090038000009                                    | Beta-glucuronidase                   | 3.2.1.31  | GLUCRE + H2O -> GLUCN + ETH             | GFAOP             |
| AO090026000127                                    | Alpha-glucuronidase                  | 3.2.1.139 | GLUCRE + H2O -> GLUCN + ETH             | GFAOP             |
| GAP                                               | Glucuronate isomerase                | 5.3.1.12  | GLUCN <-> FRUTN                         | NONE              |
| AO090011000230                                    | D-mannonate oxidoreductase           | 1.1.1.57  | FRUTN + NADH <-> MANOE + NAD            | GFAOP             |
| GAP                                               | Mannonate dehydratase                | 4.2.1.8   | MANOE <-> DEXG + H2O                    | NONE              |

| Gene name                                    | Enzyme name                                 | EC number | Biochemical reaction                           | Annotation method |
|----------------------------------------------|---------------------------------------------|-----------|------------------------------------------------|-------------------|
| AO090011000374                               | 2-deoxy-D-gluconate 3-dehydrogenase         | 1.1.1.125 | DEXG + NAD <-> DEHXG + NADH                    | GFAOP             |
| AO090003000277                               | 2-deoxy-D-gluconate 3-dehydrogenase         | 1.1.1.125 | DEXG + NAD <-> DEHXG + NADH                    | GFAOP             |
| <b># Propanoate and butanoate metabolism</b> |                                             |           |                                                |                   |
| AO090011000917                               | Propanoyl CoA synthase                      | 6.2.1.17  | PROPM + ATPm + COAm -> AMPm + PPIIm + PROPCOAm | BLASTP            |
| GAP                                          | Propionyl-CoA carboxylase                   | 6.4.1.3   | ATP + PROPCOA + HCO3 -> ADP + PI + MMCOA       | NONE              |
| AO090701000665                               | Methylmalonyl-CoA decarboxylase             | 4.1.1.41  | MMCOA -> PROPCOA + CO2                         | BLASTP            |
| GAP                                          | 1-aminocyclopropane-1-carboxylate synthase  | 4.4.1.14  | SAM -> ACPC + 5MTA                             | NONE              |
| AO090701000360                               | 1-aminocyclopropane-1-carboxylate deaminase | 3.5.99.7  | ACPC + H2O -> OBUT + NH3                       | BLASTP            |
| AO090009000568                               | Methylcitrate synthase                      | 2.3.3.5   | PROPCOAp + H2Op + OAp -> 2MCITp + COAp         | BLASTP            |
| AO090010000155                               | Methylcitrate dehydratase                   | 4.2.1.79  | 2MCITp <-> 2MACOp + H2Op                       | GFAOP             |
| GAP                                          | Methylisocitrate dehydratase                | 4.2.1.99  | 2MACOp + H2Op <-> 2MICITp                      | NONE              |
| AO090120000179                               | Methylisocitrate lyase                      | 4.1.3.30  | 2MICITp <-> PYRp + SUCCp                       | GFAOP             |
| AO090001000376                               | Acetoacetyl-CoA synthase                    | 6.2.1.16  | ATP + ACTAC + COA -> AMP + PPI + AACCOA        | BLASTP            |
| AO090005000672                               | Acetoacetyl-CoA synthase                    | 6.2.1.16  | ATP + ACTAC + COA -> AMP + PPI + AACCOA        | BLASTP            |
| AO090005001248                               | Acyl-CoA dehydrogenase                      | 1.3.99.2  | CRONYLCOAm + FADm -> C40COAm + FADH2m          | GFAOP             |
| AO090206000053                               | 3-hydroxybutyryl-CoA dehydrogenase          | 1.1.1.157 | C4HCOAm + NADPm <-> AACCOAm + NADPHm           | BLASTP            |
| <b># Inositol phosphate metabolism</b>       |                                             |           |                                                |                   |
| AO090003001009                               | Phosphatidylinositol phospholipase C        | 4.6.1.13  | PINS -> MYOCYPI + DAGLY                        | BLASTP            |
| AO090701000359                               | Myo-inositol-phosphate synthase             | 5.5.1.4   | G6P -> MI1P                                    | BLASTP            |
| AO090124000088                               | Inositol monophosphatase                    | 3.1.3.25  | MI1P + H2O -> MYOI + PI                        | GFAOP             |
| AO090038000262                               | Inositol monophosphatase                    | 3.1.3.25  | MI1P + H2O -> MYOI + PI                        | GFAOP             |
| AO090206000077                               | Inositol monophosphatase                    | 3.1.3.25  | MI1P + H2O -> MYOI + PI                        | GFAOP             |
| AO090011000613                               | Myo-inositol oxygenase                      | 1.13.99.1 | MYOI + O2 -> GLUCN                             | BLASTP            |
| AO090010000202                               | Phytase                                     | 3.1.3.8   | PYTE -> MYOI + 6 PI                            | BLASTP            |
| AO090023000692                               | Phytase                                     | 3.1.3.8   | PYTE -> MYOI + 6 PI                            | BLASTP            |
| AO090023000448                               | Phytase                                     | 3.1.3.8   | PYTE -> MYOI + 6 PI                            | BLASTP            |
| AO090023000481                               | Phytase                                     | 3.1.3.8   | PYTE -> MYOI + 6 PI                            | BLASTP            |
| AO090023000764                               | Phosphoinositide phosphatase                | 3.1.3.36  | D45PI + H2O -> PINS4P + PI                     | BLASTP            |

| Gene name                                                                  | Enzyme name                             | EC number | Biochemical reaction                     | Annotation method |
|----------------------------------------------------------------------------|-----------------------------------------|-----------|------------------------------------------|-------------------|
| AO090102000272                                                             | Inositol polyphosphate phosphatase      | 3.1.3.56  | TPI + H <sub>2</sub> O -> MYOBISPI + PI  | GFAOP             |
| GAP                                                                        | Inositol-1,4-bisphosphate 1-phosphatase | 3.1.3.57  | MYOBISPI + H <sub>2</sub> O -> MYOI + PI | NONE              |
| AO090011000611                                                             | Myo-inositol 2-dehydrogenase            | 1.1.1.18  | MYOI + NAD -> KEMYOI + NADH              | BLASTP            |
| AO090011000612                                                             | Myo-inositol 2-dehydrogenase            | 1.1.1.18  | MYOI + NAD -> KEMYOI + NADH              | BLASTP            |
| <b># L-Arabinose/Arabitol and D-Xylose/D,L-Xylulose/Xylitol metabolism</b> |                                         |           |                                          |                   |
| AO090012000287                                                             | L-xylulose reductase                    | 1.1.1.10  | LXUL + NADPH <-> XOL + NADP              | BLASTP            |
| AO090020000558                                                             | L-xylulose reductase                    | 1.1.1.10  | LXUL + NADPH <-> XOL + NADP              | BLASTP            |
| AO090103000206                                                             | L-xylulose reductase                    | 1.1.1.10  | LXUL + NADPH <-> XOL + NADP              | BLASTP            |
| AO090020000635                                                             | Xylitol dehydrogenase                   | 1.1.1.9   | XUL + NADH <-> XOL + NAD                 | GFAOP             |
| AO090020000676                                                             | Xylitol dehydrogenase                   | 1.1.1.9   | XUL + NADH <-> XOL + NAD                 | GFAOP             |
| AO090103000393                                                             | Xylitol dehydrogenase                   | 1.1.1.9   | XUL + NADH <-> XOL + NAD                 | GFAOP             |
| AO090003000859                                                             | Xylose reductase                        | 1.1.1.21  | XYL + NADPH <-> XOL + NADP               | GFAOP             |
| AO090023000264                                                             | Xylose reductase                        | 1.1.1.21  | XYL + NADPH <-> XOL + NADP               | GFAOP             |
| AO090009000575                                                             | D-arabinitol 4-dehydrogenase            | 1.1.1.11  | AOL + NAD <-> XUL + NADH                 | BLASTP            |
| AO090005001078                                                             | D-arabinitol 4-dehydrogenase            | 1.1.1.11  | AOL + NAD <-> XUL + NADH                 | BLASTP            |
| AO090023000346                                                             | D-arabinitol 4-dehydrogenase            | 1.1.1.11  | AOL + NAD <-> XUL + NADH                 | BLASTP            |
| AO090009000575                                                             | L-arabinitol 4-dehydrogenase            | 1.1.1.12  | LAOL + NAD <-> LXUL + NADH               | BLASTP            |
| AO090005001078                                                             | L-arabinitol 4-dehydrogenase            | 1.1.1.12  | LAOL + NAD <-> LXUL + NADH               | BLASTP            |
| AO090023000346                                                             | L-arabinitol 4-dehydrogenase            | 1.1.1.12  | LAOL + NAD <-> LXUL + NADH               | BLASTP            |
| AO090012000869                                                             | Aldehyde reductase                      | 1.1.1.21  | ARAB + NADPH -> AOL + NADP               | GFAOP             |
| AO090023000264                                                             | Aldehyde reductase                      | 1.1.1.21  | ARAB + NADPH -> AOL + NADP               | GFAOP             |
| AO090023000394                                                             | Aldehyde reductase                      | 1.1.1.21  | ARAB + NADPH -> AOL + NADP               | GFAOP             |
| AO090020000624                                                             | Aldehyde reductase                      | 1.1.1.21  | ARAB + NADPH -> AOL + NADP               | GFAOP             |
| AO090012000869                                                             | Aldehyde reductase                      | 1.1.1.21  | LARAB + NADPH -> LAOL + NADP             | BLASTP            |
| AO090023000264                                                             | Aldehyde reductase                      | 1.1.1.21  | LARAB + NADPH -> LAOL + NADP             | BLASTP            |
| AO090023000394                                                             | Aldehyde reductase                      | 1.1.1.21  | LARAB + NADPH -> LAOL + NADP             | BLASTP            |
| AO090020000624                                                             | Aldehyde reductase                      | 1.1.1.21  | LARAB + NADPH -> LAOL + NADP             | BLASTP            |
| AO090011000614                                                             | D-Arabinose 1-dehydrogenase (NAD(P))    | 1.1.1.117 | ARAB + NAD -> ARABLAC + NADH             | BLASTP            |
| AO090009000563                                                             | D-Arabinose 1-dehydrogenase (NAD(P))    | 1.1.1.117 | ARAB + NADP -> ARABLAC + NADPH           | BLASTP            |
| AO090020000603                                                             | D-xylulose kinase                       | 2.7.1.17  | ATP + XUL -> ADP + XUL5P                 | BLASTP            |
| AO090012000526                                                             | Formaldehyde transketolase              | 2.2.1.3   | XUL5P + FALD <-> T3P1 + GLYN             | BLASTP            |

| Gene name                                   | Enzyme name                                   | EC number | Biochemical reaction                                                                             | Annotation method |
|---------------------------------------------|-----------------------------------------------|-----------|--------------------------------------------------------------------------------------------------|-------------------|
| AO090023000345                              | Formaldehyde transketolase                    | 2.2.1.3   | XUL5P + FALD <-> T3P1 + GLYN                                                                     | BLASTP            |
| AO090001000322                              | Formaldehyde transketolase                    | 2.2.1.3   | XUL5P + FALD <-> T3P1 + GLYN                                                                     | BLASTP            |
| AO090701000508                              | Formaldehyde dehydrogenase                    | 1.2.1.46  | FALD + NAD + H2O -> FOR + NADH                                                                   | BLASTP            |
| AO090308000002                              | Formaldehyde dehydrogenase                    | 1.2.1.46  | FALD + NAD + H2O -> FOR + NADH                                                                   | BLASTP            |
| AO090020000646                              | D-ribulokinase                                | 2.7.1.47  | ATP + RL -> ADP + RL5P                                                                           | BLASTP            |
| AO090206000019                              | D-ribulokinase                                | 2.7.1.47  | ATP + RL -> ADP + RL5P                                                                           | BLASTP            |
| AO090020000646                              | Ribulokinase                                  | 2.7.1.16  | ATP + LRL -> ADP + LRL5P                                                                         | BLASTP            |
| AO090206000019                              | Ribulokinase                                  | 2.7.1.16  | ATP + LRL -> ADP + LRL5P                                                                         | BLASTP            |
| AO090009000063                              | L-ribulose-5-phosphate 4-epimerase            | 5.1.3.4   | LRL5P <-> XUL5P                                                                                  | GFAOP             |
| AO090026000216                              | L-ribulose-5-phosphate 4-epimerase            | 5.1.3.4   | LRL5P <-> XUL5P                                                                                  | GFAOP             |
| AO090701000461                              | L-ribulose-5-phosphate 4-epimerase            | 5.1.3.4   | LRL5P <-> XUL5P                                                                                  | GFAOP             |
| <b># Gluconic acid/Gluconate metabolism</b> |                                               |           |                                                                                                  |                   |
| GAP                                         | Glucose dehydrogenase                         | 1.1.99.10 | DGLC + FAD <sub>m</sub> -> GLCN15LAC + FADH <sub>2m</sub>                                        | NONE              |
| AO090005000449                              | Glucose oxidase                               | 1.1.3.4   | bDGLC + O <sub>2</sub> <-> GLCN15LAC + H <sub>2</sub> O <sub>2</sub>                             | BLASTP            |
| AO090103000214                              | Glucose oxidase                               | 1.1.3.4   | bDGLC <sub>e</sub> + O <sub>2e</sub> <-> GLCN15LAC <sub>e</sub> + H <sub>2</sub> O <sub>2e</sub> | BLASTP            |
| AO090124000002                              | Gluconolactonase                              | 3.1.1.17  | GLCN15LAC <sub>e</sub> + H <sub>2</sub> O <sub>e</sub> -> GLCNT <sub>e</sub>                     | BLASTP            |
| AO090701000487                              | Gluconolactonase                              | 3.1.1.17  | GLCN15LAC <sub>e</sub> + H <sub>2</sub> O <sub>e</sub> -> GLCNT <sub>e</sub>                     | BLASTP            |
| AO090124000002                              | Gluconolactonase                              | 3.1.1.17  | GLCN15LAC + H <sub>2</sub> O -> GLCNT                                                            | BLASTP            |
| AO090701000487                              | Gluconolactonase                              | 3.1.1.17  | GLCN15LAC + H <sub>2</sub> O -> GLCNT                                                            | BLASTP            |
| GAP                                         | 1,4-lactonase                                 | 3.1.1.25  | GALN14LAC + H <sub>2</sub> O <-> GALNT                                                           | NONE              |
| <b># Galactose/Galactitol metabolism</b>    |                                               |           |                                                                                                  |                   |
| AO090012000869                              | Aldehyde reductase                            | 1.1.1.21  | GLAC + NADPH <-> GALOL + NADP                                                                    | BLASTP            |
| AO090020000624                              | Aldehyde reductase                            | 1.1.1.21  | GLAC + NADPH <-> GALOL + NADP                                                                    | BLASTP            |
| AO090023000264                              | Aldehyde reductase                            | 1.1.1.21  | GLAC + NADPH <-> GALOL + NADP                                                                    | BLASTP            |
| AO090023000394                              | Aldehyde reductase                            | 1.1.1.21  | GLAC + NADPH <-> GALOL + NADP                                                                    | BLASTP            |
| AO090003000570                              | Galactokinase                                 | 2.7.1.6   | ATP + GLAC -> ADP + GAL1P                                                                        | BLASTP            |
| AO090026000490                              | UTP-galactose-1-phosphate uridylyltransferase | 2.7.7.10  | UTP + GAL1P <-> PPI + UDPGAL                                                                     | BLASTP            |
| AO090005001490                              | UDP-glucose 4-epimerase                       | 5.1.3.2   | UDPGAL <-> UDPG                                                                                  | BLASTP            |
| AO090010000463                              | UDP-glucose 4-epimerase                       | 5.1.3.2   | UDPGAL <-> UDPG                                                                                  | BLASTP            |
| AO090003001495                              | UDP-glucose 4-epimerase                       | 5.1.3.2   | UDPGAL <-> UDPG                                                                                  | BLASTP            |
| AO090038000558                              | UDP glucose pyrophosphorylase                 | 2.7.7.9   | G1P + UTP <-> UDPG + PPI                                                                         | BLASTP            |

| Gene name                                                           | Enzyme name                                   | EC number | Biochemical reaction           | Annotation method |
|---------------------------------------------------------------------|-----------------------------------------------|-----------|--------------------------------|-------------------|
| AO090003000746                                                      | Phosphoglucomutase                            | 5.4.2.2   | G6P <-> G1P                    | BLASTP            |
| AO090011000487                                                      | Phosphoglucomutase                            | 5.4.2.2   | G6P <-> G1P                    | BLASTP            |
| AO090001000101                                                      | Phosphoglucomutase                            | 5.4.2.2   | G6P <-> G1P                    | BLASTP            |
| AO090026000490                                                      | UDP-galactose-1-phosphate uridylyltransferase | 2.7.7.12  | UDPG + GAL1P <-> G1P + UDPGAL  | BLASTP            |
| AO090011000063                                                      | Alpha-galactosidase                           | 3.2.1.22  | MELI + H2O -> GLC + GLAC       | GFAOP             |
| AO090010000684                                                      | Alpha-galactosidase                           | 3.2.1.22  | MELI + H2O -> GLC + GLAC       | GFAOP             |
| AO090003001305                                                      | Alpha-galactosidase                           | 3.2.1.22  | MELIe + H2Oe -> GLCe + GLACe   | BLASTP            |
| AO090023000151                                                      | Alpha-galactosidase                           | 3.2.1.22  | MELIe + H2Oe -> GLCe + GLACe   | BLASTP            |
| AO090005000217                                                      | Alpha-galactosidase                           | 3.2.1.22  | MELIe + H2Oe -> GLCe + GLACe   | BLASTP            |
| AO090701000400                                                      | Beta-fructofuranosidase                       | 3.2.1.26  | SUCe + H2Oe -> GLCe + FRUe     | BLASTP            |
| AO090701000400                                                      | Beta-fructofuranosidase                       | 3.2.1.26  | RAFe + H2Oe -> FRUe + MELIe    | BLASTP            |
| AO090308000021                                                      | Galactose oxidase                             | 1.1.3.9   | GLAC + O2 -> GALNT + H2O2      | BLASTP            |
| AO090011000020                                                      | Galactose oxidase                             | 1.1.3.9   | GLAC + O2 -> GALNT + H2O2      | BLASTP            |
| AO090009000065                                                      | Tagatose-bisphosphate aldolase                | 4.1.2.40  | TDP <-> T3P2 + T3P1            | BLASTP            |
| AO090009000324                                                      | Tagatose-bisphosphate aldolase                | 4.1.2.40  | TDP <-> T3P2 + T3P1            | BLASTP            |
| AO090701000462                                                      | Tagatose-bisphosphate aldolase                | 4.1.2.40  | TDP <-> T3P2 + T3P1            | BLASTP            |
| AO090003001390                                                      | Phosphofructokinase                           | 2.7.1.11  | T6P + ATP <-> TDP + ADP        | BLASTP            |
| GAP                                                                 | Tagatose kinase                               | 2.7.1.101 | TGE + ATP <-> T6P + ADP        | NONE              |
| <b># Galactonic acid/Galactonate metabolism</b>                     |                                               |           |                                |                   |
| AO090102000225                                                      | Galactose 1-dehydrogenase                     | 1.1.1.48  | GLAC + NAD -> GALN14LAC + NADH | BLASTP            |
| AO090020000363                                                      | Galactose 1-dehydrogenase                     | 1.1.1.48  | GLAC + NAD -> GALN14LAC + NADH | BLASTP            |
| AO090003000276                                                      | Galatonate dehydratase                        | 4.2.1.6   | GALNT <-> 2D3DGALT + H2O       | BLASTP            |
| AO090001000258                                                      | Galatonate dehydratase                        | 4.2.1.6   | GALNT <-> 2D3DGALT + H2O       | BLASTP            |
| <b># Mannose/Mannitol, Fructose and Sorbose/Sorbitol metabolism</b> |                                               |           |                                |                   |
| AO090001000619                                                      | D-Sorbitol dehydrogenase (acceptor)           | 1.1.99.21 | SOR + NADH -> SOT + NAD        | BLASTP            |
| AO090011000454                                                      | Mannose-6-phosphate isomerase                 | 5.3.1.8   | MAN6P <-> F6P                  | BLASTP            |
| AO090012000554                                                      | Mannose-6-phosphate isomerase                 | 5.3.1.8   | MAN6P <-> F6P                  | BLASTP            |
| AO090023000719                                                      | Mannose-6-phosphate isomerase                 | 5.3.1.8   | MAN6P <-> F6P                  | BLASTP            |
| GAP                                                                 | Mannitol-1-phosphatase                        | 3.1.3.22  | MNT1P + H2O -> MNT + PI        | NONE              |
| AO090001000710                                                      | Hexokinase                                    | 2.7.1.1   | ATP + FRU -> ADP + F6P         | BLASTP            |

| Gene name                                                                                                                        | Enzyme name                                                 | EC number | Biochemical reaction        | Annotation method |
|----------------------------------------------------------------------------------------------------------------------------------|-------------------------------------------------------------|-----------|-----------------------------|-------------------|
| AO090003001508                                                                                                                   | Hexokinase                                                  | 2.7.1.1   | ATP + FRU -> ADP + F6P      | BLASTP            |
| AO090005000003                                                                                                                   | Hexokinase                                                  | 2.7.1.1   | ATP + FRU -> ADP + F6P      | BLASTP            |
| AO090005000083                                                                                                                   | Hexokinase                                                  | 2.7.1.1   | ATP + FRU -> ADP + F6P      | BLASTP            |
| AO090012000259                                                                                                                   | Hexokinase                                                  | 2.7.1.1   | ATP + FRU -> ADP + F6P      | BLASTP            |
| AO090011000576                                                                                                                   | Mannitol-1-phosphate dehydrogenase                          | 1.1.1.17  | MNT1P + NAD <-> F6P + NADH  | BLASTP            |
| AO090011000230                                                                                                                   | Mannitol 2-dehydrogenase                                    | 1.1.1.67  | MNT + NAD <-> FRU + NADH    | GFAOP             |
| AO090012000976                                                                                                                   | 6-phosphofructo-2-kinase                                    | 2.7.1.105 | ATP + F6P -> ADP + F26P     | BLASTP            |
| AO090701000027                                                                                                                   | 6-phosphofructo-2-kinase                                    | 2.7.1.105 | ATP + F6P -> ADP + F26P     | BLASTP            |
| AO090005000444                                                                                                                   | Fructose-2,6-bisphosphatase                                 | 3.1.3.46  | F26P + H2O -> F6P + PI      | BLASTP            |
| AO090003000030                                                                                                                   | Phosphomannomutase                                          | 5.4.2.8   | MAN1P <-> MAN6P             | BLASTP            |
| AO090003001069                                                                                                                   | Mannose-1-phosphate guanylyltransferase                     | 2.7.7.13  | GTP + MAN1P -> PPI + GDPMAN | BLASTP            |
| AO090003000189                                                                                                                   | GDP-mannose pyrophosphorylase                               | 2.7.7.22  | GDP + MAN1P <-> PI + GDPMAN | BLASTP            |
| AO090011000515                                                                                                                   | UDP-glucose:glycoprotein glucosyltransferase                | 2.4.1.-   | GDPMAN -> MANNAN            | BLASTP            |
| AO090038000631                                                                                                                   | Sorbitol dehydrogenase                                      | 1.1.1.14  | SOT + NAD -> FRU + NADH     | GFAOP             |
| AO090020000647                                                                                                                   | Sorbitol dehydrogenase                                      | 1.1.1.14  | SOT + NAD -> FRU + NADH     | GFAOP             |
| AO090701000411                                                                                                                   | Sorbitol dehydrogenase                                      | 1.1.1.14  | SOT + NAD -> FRU + NADH     | GFAOP             |
| AO090011000515                                                                                                                   | UDP-glucose:glycoprotein glucosyltransferase                | 2.4.1.-   | GDPMAN -> 14MNAN            | BLASTP            |
| AO090038000444                                                                                                                   | Endo-1,4-beta-mannosidase                                   | 3.2.1.78  | 14MNAN -> MAN               | BLASTP            |
| AO090010000122                                                                                                                   | Endo-1,4-beta-mannosidase                                   | 3.2.1.78  | 14MNAN -> MAN               | BLASTP            |
| AO090001000710                                                                                                                   | Hexokinase                                                  | 2.7.1.1   | ATP + MAN -> ADP + MAN6P    | BLASTP            |
| AO090003001508                                                                                                                   | Hexokinase                                                  | 2.7.1.1   | ATP + MAN -> ADP + MAN6P    | BLASTP            |
| AO090005000003                                                                                                                   | Hexokinase                                                  | 2.7.1.1   | ATP + MAN -> ADP + MAN6P    | BLASTP            |
| AO090005000083                                                                                                                   | Hexokinase                                                  | 2.7.1.1   | ATP + MAN -> ADP + MAN6P    | BLASTP            |
| AO090012000259                                                                                                                   | Hexokinase                                                  | 2.7.1.1   | ATP + MAN -> ADP + MAN6P    | BLASTP            |
| <b># Disaccharide metabolism (Trehalose, Maltose, Lactose)</b>                                                                   |                                                             |           |                             |                   |
| AO090003000417/<br>AO090026000820/<br>AO090020000035/<br>AO090005001531/<br>AO090005001530/<br>AO090102000159/<br>AO090026000819 | Alpha, alpha -trehalose-phosphate synthase<br>(UDP-forming) | 2.4.1.15  | UDPG + G6P -> UDP + TRE6P   | BLASTP            |



| Gene name                                                                 | Enzyme name                               | EC number | Biochemical reaction          | Annotation method |
|---------------------------------------------------------------------------|-------------------------------------------|-----------|-------------------------------|-------------------|
| AO090020000035                                                            | Trehalose-phosphatase                     | 3.1.3.12  | TRE6P + H2O -> TRE + PI       | BLASTP            |
| AO090009000215                                                            | Trehalase                                 | 3.2.1.28  | TRE + H2O -> 2 DGLC           | BLASTP            |
| AO090120000052                                                            | Trehalase                                 | 3.2.1.28  | TREe + H2Oe -> 2 DGLCe        | BLASTP            |
| AO090103000417                                                            | Trehalose synthase                        | 5.4.99.16 | TRE <-> MLT                   | BLASTP            |
| AO090023000288                                                            | Alpha-glucosidase                         | 3.2.1.20  | MLT + H2O -> 2 GLC            | GFAOP             |
| AO090003001209                                                            | Alpha-glucosidase                         | 3.2.1.20  | MLTe + H2Oe -> 2 GLCe         | BLASTP            |
| AO090038000471                                                            | Alpha-glucosidase                         | 3.2.1.20  | MLTe + H2Oe -> 2 GLCe         | BLASTP            |
| AO090005001084                                                            | Alpha-glucosidase                         | 3.2.1.20  | MLT + H2O -> 2 GLC            | GFAOP             |
| AO090103000129                                                            | Alpha-glucosidase                         | 3.2.1.20  | MLT + H2O -> 2 GLC            | GFAOP             |
| AO090038000234                                                            | Alpha-glucosidase                         | 3.2.1.20  | MLT + H2O -> 2 GLC            | BLASTP            |
| AO090012000445                                                            | Beta-galactosidase                        | 3.2.1.23  | LACTe + H2Oe -> GLCe + GLACe  | BLASTP            |
| AO090701000770                                                            | Beta-galactosidase                        | 3.2.1.23  | LACTe + H2Oe -> GLCe + GLACe  | BLASTP            |
| AO090012000745                                                            | Beta-galactosidase                        | 3.2.1.23  | LACTe + H2Oe -> GLCe + GLACe  | BLASTP            |
| AO090003000042                                                            | Beta-galactosidase                        | 3.2.1.23  | LACTe + H2Oe -> GLCe + GLACe  | BLASTP            |
| AO090120000158                                                            | Beta-galactosidase                        | 3.2.1.23  | LACTe + H2Oe -> GLCe + GLACe  | BLASTP            |
| AO090001000259                                                            | Beta-galactosidase                        | 3.2.1.23  | LACT + H2O -> GLC + GLAC      | BLASTP            |
| AO090012000389                                                            | Beta-galactosidase                        | 3.2.1.23  | LACT + H2O -> GLC + GLAC      | BLASTP            |
| <b># Polysaccharide metabolism (Starch, Cellulose, Chitin, and Xylan)</b> |                                           |           |                               |                   |
| AO090038000595                                                            | UDP-N-acetylglucosamine pyrophosphorylase | 2.7.7.23  | UTP + NAGA1P <-> PPI + UDPNAG | BLASTP            |
| AO090010000463                                                            | UDP-glucose 4-epimerase                   | 5.1.3.7   | UDPNAG <-> UDPNAGA            | BLASTP            |
| AO090005001490                                                            | UDP-glucose 4-epimerase                   | 5.1.3.7   | UDPNAG <-> UDPNAGA            | BLASTP            |
| AO090009000174/<br>AO090009000686                                         | 1,3-beta-glucan synthase                  | 2.4.1.34  | UDPG -> UDP + 13GLUCAN        | BLASTP            |
| AO090005001553                                                            | Endoglucanase                             | 3.2.1.4   | CELLUe -> 13GLUCANe           | BLASTP            |
| AO090011000715                                                            | Endoglucanase                             | 3.2.1.4   | CELLUe -> 13GLUCANe           | BLASTP            |
| AO090001000221                                                            | Endoglucanase                             | 3.2.1.4   | CELLUe -> 13GLUCANe           | BLASTP            |
| AO090003000905                                                            | Endoglucanase                             | 3.2.1.4   | CELLUe -> 13GLUCANe           | BLASTP            |
| AO090026000102                                                            | Endoglucanase                             | 3.2.1.4   | CELLUe -> 13GLUCANe           | BLASTP            |
| AO090005001553                                                            | Endoglucanase                             | 3.2.1.4   | CELLOBe -> 13GLUCANe          | BLASTP            |
| AO090011000715                                                            | Endoglucanase                             | 3.2.1.4   | CELLOBe -> 13GLUCANe          | BLASTP            |



| Gene name      | Enzyme name                       | EC number | Biochemical reaction                       | Annotation method |
|----------------|-----------------------------------|-----------|--------------------------------------------|-------------------|
| AO090001000221 | Endoglucanase                     | 3.2.1.4   | CELLOBe -> 13GLUCANe                       | BLASTP            |
| AO090003000905 | Endoglucanase                     | 3.2.1.4   | CELLOBe -> 13GLUCANe                       | BLASTP            |
| AO090026000102 | Endoglucanase                     | 3.2.1.4   | CELLOBe -> 13GLUCANe                       | BLASTP            |
| AO090012000941 | Cellulose 1,4-beta-cellobiosidase | 3.2.1.91  | CELLUe + H2Oe -> CELLOBe + DGLCe + CELLOTe | BLASTP            |
| AO090038000439 | Cellulose 1,4-beta-cellobiosidase | 3.2.1.91  | CELLUe + H2Oe -> CELLOBe + DGLCe + CELLOTe | BLASTP            |
| AO090001000348 | Cellulose 1,4-beta-cellobiosidase | 3.2.1.91  | CELLUe + H2Oe -> CELLOBe + DGLCe + CELLOTe | BLASTP            |
| AO090010000314 | Cellulose 1,4-beta-cellobiosidase | 3.2.1.91  | CELLUe + H2Oe -> CELLOBe + DGLCe + CELLOTe | BLASTP            |
| AO090003000497 | Beta-glucosidase                  | 3.2.1.21  | CELLOB -> bDGLC                            | BLASTP            |
| AO090010000034 | Beta-glucosidase                  | 3.2.1.21  | CELLOB -> bDGLC                            | BLASTP            |
| AO090011000140 | Beta-glucosidase                  | 3.2.1.21  | CELLOBe -> bDGLCe                          | BLASTP            |
| AO090001000544 | Beta-glucosidase                  | 3.2.1.21  | CELLOB -> bDGLC                            | BLASTP            |
| AO090009000554 | Beta-glucosidase                  | 3.2.1.21  | CELLOB -> bDGLC                            | BLASTP            |
| AO090166000090 | Beta-glucosidase                  | 3.2.1.21  | CELLOB -> bDGLC                            | BLASTP            |
| AO090701000244 | Beta-glucosidase                  | 3.2.1.21  | CELLOB -> bDGLC                            | BLASTP            |
| AO090701000274 | Beta-glucosidase                  | 3.2.1.21  | CELLOB -> bDGLC                            | BLASTP            |
| AO090113000148 | Beta-glucosidase                  | 3.2.1.21  | CELLOB -> bDGLC                            | BLASTP            |
| AO090038000223 | Beta-glucosidase                  | 3.2.1.21  | CELLOB -> bDGLC                            | BLASTP            |
| AO090038000425 | Beta-glucosidase                  | 3.2.1.21  | CELLOB -> bDGLC                            | BLASTP            |
| AO090012000135 | Beta-glucosidase                  | 3.2.1.21  | CELLOBe -> bDGLCe                          | BLASTP            |
| AO090009000356 | Beta-glucosidase                  | 3.2.1.21  | CELLOBe -> bDGLCe                          | BLASTP            |
| AO090003001511 | Beta-glucosidase                  | 3.2.1.21  | CELLOBe -> bDGLCe                          | BLASTP            |
| AO090120000075 | Beta-glucosidase                  | 3.2.1.21  | CELLOBe -> bDGLCe                          | BLASTP            |
| AO090701000841 | Beta-glucosidase                  | 3.2.1.21  | CELLOBe -> bDGLCe                          | BLASTP            |
| AO090102000032 | Cellobiose dehydrogenase          | 1.1.99.18 | CELLOBe <-> CB15LCTe                       | GFAOP             |
| AO090102000058 | Cellobiose dehydrogenase          | 1.1.99.18 | CELLOBe <-> CB15LCTe                       | GFAOP             |
| AO090010000757 | Cellobiose dehydrogenase          | 1.1.99.18 | CELLOB <-> CB15LCT                         | BLASTP            |
| AO090026000220 | Cellobiose dehydrogenase          | 1.1.99.18 | CELLOB <-> CB15LCT                         | BLASTP            |
| AO090113000054 | Cellobiose dehydrogenase          | 1.1.99.18 | CELLOB <-> CB15LCT                         | BLASTP            |
| AO090010000746 | Glucoamylase                      | 3.2.1.3   | GLYCOGENe -> GLCe                          | BLASTP            |

| Gene name      | Enzyme name                           | EC number | Biochemical reaction                 | Annotation method |
|----------------|---------------------------------------|-----------|--------------------------------------|-------------------|
| AO090003000321 | Glucoamylase                          | 3.2.1.3   | GLYCOGENe -> GLCe                    | BLASTP            |
| AO090010000746 | Glucoamylase                          | 3.2.1.3   | STARe -> GLCe                        | BLASTP            |
| AO090003000321 | Glucoamylase                          | 3.2.1.3   | STARe -> GLCe                        | BLASTP            |
| AO090102000361 | Glycogen synthase                     | 2.4.1.11  | UDPG -> UDP + GLYNIN                 | BLASTP            |
| AO090010000483 | 1,4-alpha-glucan branching enzyme     | 2.4.1.18  | GLYNIN -> GLYCOGEN                   | BLASTP            |
| AO090012000601 | Glycogen phosphorylase                | 2.4.1.1   | GLYCOGEN + PI -> G1P + GLYCODEX      | BLASTP            |
| AO090005000884 | Amylo-1,6-glucosidase                 | 3.2.1.33  | GLYCODEX + H2O -> MLTOSE + DGLYCODEX | BLASTP            |
| AO090012000601 | Glycogen phosphorylase                | 2.4.1.1   | MLTOSE + PI -> G1P + MLTIOSE         | BLASTP            |
| AO090023000288 | Alpha-glucosidase                     | 3.2.1.20  | MLTIOSE + H2O -> MLT + GLC           | BLASTP            |
| AO090003001209 | Alpha-glucosidase                     | 3.2.1.20  | MLTIOSE + H2O -> MLT + GLC           | BLASTP            |
| AO090038000471 | Alpha-glucosidase                     | 3.2.1.20  | MLTIOSE + H2O -> MLT + GLC           | BLASTP            |
| AO090005001084 | Alpha-glucosidase                     | 3.2.1.20  | MLTIOSE + H2O -> MLT + GLC           | BLASTP            |
| AO090103000129 | Alpha-glucosidase                     | 3.2.1.20  | MLTIOSE + H2O -> MLT + GLC           | BLASTP            |
| AO090038000234 | Alpha-glucosidase                     | 3.2.1.20  | MLTIOSE + H2O -> MLT + GLC           | BLASTP            |
| AO090005000884 | 4-alpha-glucanotransferase            | 2.4.1.25  | MLT + MLTIOSE -> MLTOSE + bDGLC      | BLASTP            |
| AO090102000139 | Exo-polygalacturonase                 | 3.2.1.67  | PTATEe + H2Oe -> GALUNTe             | BLASTP            |
| GAP            | D-Galacturonate reductase             | 1.1.1.19  | GALUNT + NADPH <-> LGALNT + NADP     | NONE              |
| GAP            | L-Galactonate dehydratase             | 4.2.1.-   | LGALNT -> H2O + TR3DHT               | NONE              |
| GAP            | L-threo-3-deoxy-hexulosonate aldolase | 4.1.2.-   | TR3DHT <-> PYR + LGLYAL              | NONE              |
| GAP            | Glyceraldehyde reductase              | 1.1.1.21  | LGLYAL + NADPH -> GL + NADP          | NONE              |
| AO090103000019 | Beta-N-acetylglucosaminidase          | 3.2.1.52  | CHIB + H2O -> NAG                    | BLASTP            |
| AO090005000639 | Beta-N-acetylglucosaminidase          | 3.2.1.52  | CHIBe + H2Oe -> NAGe                 | BLASTP            |
| AO090023000367 | Chitinase                             | 3.2.1.14  | CHIT + H2O -> CHIB                   | BLASTP            |
| AO090020000207 | Chitinase                             | 3.2.1.14  | CHIT + H2O -> CHIB                   | BLASTP            |
| AO090102000586 | Chitinase                             | 3.2.1.14  | CHIT + H2O -> CHIB                   | BLASTP            |
| AO090020000231 | Chitinase                             | 3.2.1.14  | CHIT + H2O -> CHIB                   | BLASTP            |
| AO090102000563 | Chitinase                             | 3.2.1.14  | CHIT + H2O -> CHIB                   | BLASTP            |
| AO090102000591 | Chitinase                             | 3.2.1.14  | CHIT + H2O -> CHIB                   | BLASTP            |
| AO090003000464 | Chitinase                             | 3.2.1.14  | CHIT + H2O -> CHIB                   | BLASTP            |
| AO090005000815 | Chitinase                             | 3.2.1.14  | CHIT + H2O -> CHIB                   | BLASTP            |
| AO090103000218 | Chitinase                             | 3.2.1.14  | CHIT + H2O -> CHIB                   | BLASTP            |

| Gene name      | Enzyme name                                 | EC number | Biochemical reaction     | Annotation method |
|----------------|---------------------------------------------|-----------|--------------------------|-------------------|
| AO090003000680 | Chitinase                                   | 3.2.1.14  | CHITe + H2Oe -> CHIBe    | BLASTP            |
| AO090012000041 | Chitinase                                   | 3.2.1.14  | CHITe + H2Oe -> CHIBe    | BLASTP            |
| AO090103000180 | Chitinase                                   | 3.2.1.14  | CHITe + H2Oe -> CHIBe    | BLASTP            |
| AO090023000367 | Chitinase                                   | 3.2.1.14  | CHIT + H2O -> NAG        | BLASTP            |
| AO090020000207 | Chitinase                                   | 3.2.1.14  | CHIT + H2O -> NAG        | BLASTP            |
| AO090102000586 | Chitinase                                   | 3.2.1.14  | CHIT + H2O -> NAG        | BLASTP            |
| AO090020000231 | Chitinase                                   | 3.2.1.14  | CHIT + H2O -> NAG        | BLASTP            |
| AO090102000563 | Chitinase                                   | 3.2.1.14  | CHIT + H2O -> NAG        | BLASTP            |
| AO090102000591 | Chitinase                                   | 3.2.1.14  | CHIT + H2O -> NAG        | BLASTP            |
| AO090003000464 | Chitinase                                   | 3.2.1.14  | CHIT + H2O -> NAG        | BLASTP            |
| AO090005000815 | Chitinase                                   | 3.2.1.14  | CHIT + H2O -> NAG        | BLASTP            |
| AO090103000218 | Chitinase                                   | 3.2.1.14  | CHIT + H2O -> NAG        | BLASTP            |
| AO090003000680 | Chitinase                                   | 3.2.1.14  | CHITe + H2Oe -> NAGe     | BLASTP            |
| AO090012000041 | Chitinase                                   | 3.2.1.14  | CHITe + H2Oe -> NAGe     | BLASTP            |
| AO090103000180 | Chitinase                                   | 3.2.1.14  | CHITe + H2Oe -> NAGe     | BLASTP            |
| AO090102000400 | N-acetylglucosamine kinase                  | 2.7.1.59  | NAG -> NAGA6P            | GFAOP             |
| AO090103000023 | N-acetylglucosamine-6-phosphate deacetylase | 3.5.1.25  | NAGA6P+ H2O -> GA6P + AC | BLASTP            |
| AO090103000020 | Glucosamine-6-phosphate deaminase           | 3.5.99.6  | GA6P + H2O -> F6P + NH3  | BLASTP            |
| AO090001000710 | Hexokinase                                  | 2.7.1.1   | ATP + GLCN -> ADP + GA6P | BLASTP            |
| AO090003001508 | Hexokinase                                  | 2.7.1.1   | ATP + GLCN -> ADP + GA6P | BLASTP            |
| AO090005000003 | Hexokinase                                  | 2.7.1.1   | ATP + GLCN -> ADP + GA6P | BLASTP            |
| AO090005000083 | Hexokinase                                  | 2.7.1.1   | ATP + GLCN -> ADP + GA6P | BLASTP            |
| AO090012000259 | Hexokinase                                  | 2.7.1.1   | ATP + GLCN -> ADP + GA6P | BLASTP            |
| AO090005001370 | Chitin synthase                             | 2.4.1.16  | UDPNAG -> UDP + CHIT     | BLASTP            |
| AO090011000449 | Chitin synthase                             | 2.4.1.16  | UDPNAG -> UDP + CHIT     | BLASTP            |
| AO090012000084 | Chitin synthase                             | 2.4.1.16  | UDPNAG -> UDP + CHIT     | BLASTP            |
| AO090206000079 | Chitin synthase                             | 2.4.1.16  | UDPNAG -> UDP + CHIT     | BLASTP            |
| AO090701000589 | Chitin synthase                             | 2.4.1.16  | UDPNAG -> UDP + CHIT     | BLASTP            |
| AO090005001370 | Chitin synthase                             | 2.4.1.16  | UDPNAG -> UDP + CHIT     | BLASTP            |

| Gene name      | Enzyme name               | EC number | Biochemical reaction        | Annotation method |
|----------------|---------------------------|-----------|-----------------------------|-------------------|
| AO090005001371 | Chitin synthase           | 2.4.1.16  | UDPNAG -> UDP + CHIT        | BLASTP            |
| AO090113000128 | Chitin synthase           | 2.4.1.16  | UDPNAG -> UDP + CHIT        | BLASTP            |
| AO090005000579 | Chitin synthase           | 2.4.1.16  | UDPNAG -> UDP + CHIT        | BLASTP            |
| AO090026000212 | Chitin synthase           | 2.4.1.16  | UDPNAG -> UDP + CHIT        | BLASTP            |
| AO090026000321 | Chitin synthase           | 2.4.1.16  | UDPNAG -> UDP + CHIT        | BLASTP            |
| AO090026000323 | Chitin synthase           | 2.4.1.16  | UDPNAG -> UDP + CHIT        | BLASTP            |
| ZY029184       | Chitin synthase           | 2.4.1.16  | UDPNAG -> UDP + CHIT        | EST               |
| AO090023000239 | Chitin deacetylase        | 3.5.1.41  | CHITe + H2Oe -> CHITe + ACe | BLASTP            |
| AO090023000238 | Chitin deacetylase        | 3.5.1.41  | CHIT + H2O -> CHITe + AC    | BLASTP            |
| AO090003001241 | Chitin deacetylase        | 3.5.1.41  | CHIT + H2O -> CHITe + AC    | BLASTP            |
| AO090011000027 | Chitosanase               | 3.2.1.132 | CHITe -> GLCN               | BLASTP            |
| AO090020000697 | Chitosanase               | 3.2.1.132 | CHITe -> GLCN               | BLASTP            |
| AO090113000063 | Chitosanase               | 3.2.1.132 | CHITe -> GLCNe              | BLASTP            |
| AO090003000990 | Exo-beta-1,3-glucanase    | 3.2.1.58  | 13GLUCAN -> GLC             | BLASTP            |
| AO090023000365 | Exo-beta-1,3-glucanase    | 3.2.1.58  | 13GLUCANe -> GLCe           | BLASTP            |
| AO090020000144 | Exo-beta-1,3-glucanase    | 3.2.1.58  | 13GLUCANe -> GLCe           | BLASTP            |
| AO090001000604 | Exo-beta-1,3-glucanase    | 3.2.1.58  | 13GLUCANe -> GLCe           | BLASTP            |
| AO090011000362 | Exo-beta-1,3-glucanase    | 3.2.1.58  | 13GLUCANe -> GLCe           | BLASTP            |
| AO090003001500 | Alpha-1,3-glucan synthase | 2.4.1.183 | UDPG -> UDP + 13GLUCAN      | BLASTP            |
| AO090026000523 | Alpha-1,3-glucan synthase | 2.4.1.183 | UDPG -> UDP + 13GLUCAN      | BLASTP            |
| AO090010000106 | Alpha-1,3-glucan synthase | 2.4.1.183 | UDPG -> UDP + 13GLUCAN      | BLASTP            |
| AO090003001498 | Alpha-amylase             | 3.2.1.1   | STARe -> GLCe               | BLASTP            |
| AO090023000944 | Alpha-amylase             | 3.2.1.1   | STARe -> GLCe               | BLASTP            |
| AO090120000196 | Alpha-amylase             | 3.2.1.1   | STARe -> GLCe               | BLASTP            |
| AO090120000263 | Alpha-amylase             | 3.2.1.1   | STARe -> GLCe               | BLASTP            |
| AO090005001193 | Alpha-amylase             | 3.2.1.1   | STAR -> GLC                 | BLASTP            |
| AO090003001497 | Alpha-amylase             | 3.2.1.1   | STAR -> GLC                 | BLASTP            |
| AO090003001498 | Alpha-amylase             | 3.2.1.1   | GLYCOGENe -> GLCe           | BLASTP            |
| AO090023000944 | Alpha-amylase             | 3.2.1.1   | GLYCOGENe -> GLCe           | BLASTP            |
| AO090120000196 | Alpha-amylase             | 3.2.1.1   | GLYCOGENe -> GLCe           | BLASTP            |
| AO090120000263 | Alpha-amylase             | 3.2.1.1   | GLYCOGENe -> GLCe           | BLASTP            |

| Gene name      | Enzyme name                                    | EC number | Biochemical reaction | Annotation method |
|----------------|------------------------------------------------|-----------|----------------------|-------------------|
| AO090005001193 | Alpha-amylase                                  | 3.2.1.1   | GLYCOGEN -> GLC      | BLASTP            |
| AO090003001497 | Alpha-amylase                                  | 3.2.1.1   | GLYCOGEN -> GLC      | BLASTP            |
| AO090003000476 | Mannosyl-oligosaccharide 1,2-alpha-mannosidase | 3.2.1.113 | MANNAN -> MAN        | BLASTP            |
| AO090009000178 | Mannosyl-oligosaccharide 1,2-alpha-mannosidase | 3.2.1.113 | MANNAN -> MAN        | BLASTP            |
| AO090003000057 | Mannosyl-oligosaccharide 1,2-alpha-mannosidase | 3.2.1.113 | MANNAN -> MAN        | BLASTP            |
| AO090005001458 | Alpha-mannosidase                              | 3.2.1.24  | MANNAN -> MAN        | BLASTP            |
| AO090003001225 | Alpha-mannosidase                              | 3.2.1.24  | MANNAN -> MAN        | BLASTP            |
| AO090001000556 | Beta-mannosidase                               | 3.2.1.25  | MANNAN -> MAN        | BLASTP            |
| AO090005000740 | Beta-mannosidase                               | 3.2.1.25  | MANNAN -> MAN        | BLASTP            |
| AO090010000208 | Beta-mannosidase                               | 3.2.1.25  | MANNANe -> MANe      | BLASTP            |
| AO090023000401 | Endo-polygalacturonase                         | 3.2.1.15  | PTATEe -> GALUNTe    | BLASTP            |
| AO090023000161 | Endo-polygalacturonase                         | 3.2.1.15  | PTATEe -> GALUNTe    | BLASTP            |
| AO090005000186 | Endo-polygalacturonase                         | 3.2.1.15  | PTATEe -> GALUNTe    | BLASTP            |
| AO090023000001 | Alpha-L-arabinofuranosidase                    | 3.2.1.55  | ARABINe -> LARABe    | BLASTP            |
| AO090124000023 | Alpha-L-arabinofuranosidase                    | 3.2.1.55  | ARABINe -> LARABe    | BLASTP            |
| AO090012000298 | Alpha-L-arabinofuranosidase                    | 3.2.1.55  | ARABINe -> LARABe    | BLASTP            |
| AO090020000712 | Alpha-L-arabinofuranosidase                    | 3.2.1.55  | ARABINe -> LARABe    | BLASTP            |
| AO090005000476 | Endo-1,5-alpha-L-arabinanase                   | 3.2.1.99  | ARABINe -> LARABe    | BLASTP            |
| AO090138000055 | Endo-1,5-alpha-L-arabinanase                   | 3.2.1.99  | ARABINe -> LARABe    | BLASTP            |
| AO090701000481 | Endo-1,5-alpha-L-arabinanase                   | 3.2.1.99  | ARABINe -> LARABe    | BLASTP            |
| AO090005000986 | Beta-xylosidase                                | 3.2.1.37  | XYLANe -> XYLe       | GFAOP             |
| AO090103000120 | Beta-xylosidase                                | 3.2.1.37  | XYLANe -> XYLe       | GFAOP             |
| AO090005000337 | Beta-xylosidase                                | 3.2.1.37  | XYLAN -> XYL         | GFAOP             |
| AO090005000698 | Beta-xylosidase                                | 3.2.1.37  | XYLAN -> XYL         | GFAOP             |
| AO090103000326 | Endo-1,4-beta-xylanase                         | 3.2.1.8   | XYLANe -> XYLe       | GFAOP             |
| AO090701000887 | Endo-1,4-beta-xylanase                         | 3.2.1.8   | XYLANe -> XYLe       | GFAOP             |
| AO090001000111 | Endo-1,4-beta-xylanase                         | 3.2.1.8   | XYLANe -> XYLe       | GFAOP             |
| AO090120000026 | Endo-1,4-beta-xylanase                         | 3.2.1.8   | XYLANe -> XYLe       | GFAOP             |
| AO090103000423 | Endo-1,4-beta-xylanase                         | 3.2.1.8   | XYLANe -> XYLe       | GFAOP             |
| AO090001000208 | Endo-1,4-beta-xylanase                         | 3.2.1.8   | XYLANe -> XYLe       | GFAOP             |

| Gene name                                                                                                                                                                                                                                                                                                                                    | Enzyme name                     | EC number | Biochemical reaction                          | Annotation method |
|----------------------------------------------------------------------------------------------------------------------------------------------------------------------------------------------------------------------------------------------------------------------------------------------------------------------------------------------|---------------------------------|-----------|-----------------------------------------------|-------------------|
| <b># 2. Energy metabolism</b>                                                                                                                                                                                                                                                                                                                |                                 |           |                                               |                   |
| <b># Oxidative phosphorylation</b>                                                                                                                                                                                                                                                                                                           |                                 |           |                                               |                   |
| ZY104986                                                                                                                                                                                                                                                                                                                                     | Polyphosphate kinase            | 2.7.4.1   | ATP + 3 PI <-> ADP + 2 PPI                    | EST               |
| AO090005001437                                                                                                                                                                                                                                                                                                                               | Inorganic pyrophosphatase       | 3.6.1.1   | PPI -> 2 PI                                   | BLASTP            |
| AO090003001115/<br>AO090011000782/<br>AO090001000553/<br>AO090026000229/<br>AO090001000661/<br>AO090011000578/<br>AO090003001313/<br>AO090102000645/<br>AO090012000402/<br>AO090011000502/<br>AO090103000199/<br>AO090672000005/<br>AO090001000459/<br>AO090001000300/<br>AO090003000400/<br>ZY006639/<br>ZY081278/<br>ZY083531/<br>ZY087692 | NADH dehydrogenase (ubiquinone) | 1.6.5.3   | NADHm + Qm + 4 H_PO_m -> NADm + QH2m + 4 H_PO | EST, BLASTP       |
| AO090003001115/<br>AO090011000782/<br>AO090001000553/<br>AO090026000229/<br>AO090001000661/<br>AO090011000578/<br>AO090003001313/<br>AO090102000645/<br>AO090012000402/<br>AO090011000502/                                                                                                                                                   | NADH dehydrogenase (ubiquinone) | 1.6.5.3   | NADH + Qm -> QH2m + NAD                       | EST, BLASTP       |

| Gene name                                                                                                                                                                                                                                                                                                                                   | Enzyme name                                 | EC number | Biochemical reaction                                | Annotation method |
|---------------------------------------------------------------------------------------------------------------------------------------------------------------------------------------------------------------------------------------------------------------------------------------------------------------------------------------------|---------------------------------------------|-----------|-----------------------------------------------------|-------------------|
| AO090103000199/<br>AO090672000005/<br>AO090001000459/<br>AO090001000300/<br>AO090003000400/<br>ZY006639/<br>ZY081278/<br>ZY083531/<br>ZY087692                                                                                                                                                                                              | NADH dehydrogenase (FAD-containing subunit) | 1.6.99.3  | NADH + FADm -> NAD + FADH2m                         | EST, BLASTP       |
| AO090003001115/<br>AO090011000782/<br>AO090001000553/<br>AO090026000229/<br>AO090001000661/<br>AO090011000578/<br>AO090003001313/<br>AO090102000645/<br>AO090012000402/<br>AO090011000502/<br>AO090103000199/<br>AO090672000005/<br>AO090001000459/<br>AO090001000300/<br>AO090003000400/<br>AO090001000657/<br>AO090011000358/<br>ZY083011 | NADPH-cytochrome p-450 reductase            | 1.6.2.4   | NADPH + 2 FERIm -> NADP + 2 FEROm                   | BLASTP            |
| AO090011000910                                                                                                                                                                                                                                                                                                                              | NADPH-cytochrome p-450 reductase            | 1.6.2.4   | NADPH + 2 FERIm -> NADP + 2 FEROm                   | BLASTP            |
| AO090005000842/<br>AO090020000403/<br>AO090102000565                                                                                                                                                                                                                                                                                        | H+-exporting ATPase                         | 3.6.3.6   | ATPm + H2Om + 3.87 H_PO_m -> ADPm + PIm + 3.87 H_PO | BLASTP            |

| Gene name                                                                                                     | Enzyme name                                      | EC number | Biochemical reaction                                           | Annotation method |
|---------------------------------------------------------------------------------------------------------------|--------------------------------------------------|-----------|----------------------------------------------------------------|-------------------|
| AO090038000088/<br>AO090005000141                                                                             | H+/K+-exchanging ATPase                          | 3.6.3.10  | ATPm + H2Om + 3.87 H_PO_m + K -> ADPm + PIm + 3.87 H_PO + Km   | BLASTP            |
| AO090011000813/<br>AO090120000088/<br>AO090003001200/<br>AO090701000148                                       | Phospholipid-translocating ATPase                | 3.6.3.1   | ATPm + H2Om + PEm -> ADPm + PIm + PE                           | BLASTP            |
| AO090011000813/<br>AO090120000088/<br>AO090003001200/<br>AO090701000148                                       | Phospholipid-translocating ATPase                | 3.6.3.1   | ATPm + H2Om + PSm -> ADPm + PIm + PS                           | BLASTP            |
| AO090011000813/<br>AO090120000088/<br>AO090003001200/<br>AO090701000148                                       | Phospholipid-translocating ATPase                | 3.6.3.1   | ATPm + H2Om + PGm -> ADPm + PIm + PG                           | BLASTP            |
| AO090011000813/<br>AO090120000088/<br>AO090003001200/<br>AO090701000148                                       | Phospholipid-translocating ATPase                | 3.6.3.1   | ATPm + H2Om + PAm -> ADPm + PIm + PA                           | BLASTP            |
| AO090009000330/<br>AO090012000848                                                                             | Cu2+-exporting ATPase                            | 3.6.3.4   | ATPm + H2Om + 3.87 H_PO_m + Cu -> ADPm + PIm + 3.87 H_PO + Cum | BLASTP            |
| AO090023000590/<br>AO090009000591                                                                             | Na+-exporting ATPase                             | 3.6.3.7   | ATPm + H2Om + 3.87 H_PO_m + Na -> ADPm + PIm + 3.87 H_PO + Nam | BLASTP            |
| AO090001000706/<br>AO090003000051/<br>AO090701000406/<br>AO090038000322/<br>AO090005000799/<br>AO090003000614 | Ca2+-transporting ATPase                         | 3.6.3.8   | ATPm + H2Om + 3.87 H_PO_m + Ca -> ADPm + PIm + 3.87 H_PO + Cam | BLASTP            |
| AO090003000460                                                                                                | NAD(P)H oxidase                                  | 1.6.3.1   | NADPH + O2 -> NADP + H2O2                                      | BLASTP            |
| AO090003000460                                                                                                | NADPH dehydrogenase (Quinone)                    | 1.6.99.6  | NADPH + Qm -> QH2m + NADP                                      | BLASTP            |
| AO090003000545                                                                                                | Electron-transferring-flavoprotein dehydrogenase | 1.5.5.1   | FADH2m + Qm -> FADm + QH2m                                     | BLASTP            |



| Gene name                                                                                                                                                                                                                 | Enzyme name                      | EC number | Biochemical reaction                                     | Annotation method |
|---------------------------------------------------------------------------------------------------------------------------------------------------------------------------------------------------------------------------|----------------------------------|-----------|----------------------------------------------------------|-------------------|
| AO090010000475/<br>AO090102000625/<br>ZY007427                                                                                                                                                                            | Ubiquinol-cytochrome c reductase | 1.10.2.2  | QH2m + 2 FERIm + 4 H_PO_m -> Qm + 2 FEROm +<br>4 H_PO    | EST, BLASTP       |
| AO090010000481/<br>AO090026000651/<br>AO090026000421/<br>ZY007107/<br>ZY007619/<br>ZY029203/<br>ZY029342                                                                                                                  | Cytochrome c oxidase             | 1.9.3.12  | FEROm + 0.5 O2m + 4 H_PO_m -> 2 FERIm + H2Om +<br>4 H_PO | EST, BLASTP       |
| AO090005000617/<br>AO090005000749/<br>AO090005000604/<br>AO090026000372/<br>AO090010000482/<br>AO090701000168/<br>AO090206000115/<br>AO090010000482/<br>AO090003000607/<br>AO090023000599/<br>ZY036719                    | F-type ATPase complex            | 3.6.3.14  | ADPm + PIm + 3.87 H_PO -> ATPm + H2Om + 3.87 H_PO_m      | EST, BLASTP       |
| AO090102000349/<br>AO090038000334/<br>AO090026000283/<br>AO090120000313/<br>AO090120000091/<br>AO090003001090/<br>AO090012000797/<br>AO090026000517/<br>AO090038000579/<br>AO090038000352/<br>AO090012000274/<br>ZY036719 | V-type ATPase complex            | 3.6.3.14  | ADPm + PIm + 3.87 H_PO -> ATPm + H2Om + 3.87 H_PO_m      | EST, BLASTP       |

| Gene name                    | Enzyme name                                     | EC number       | Biochemical reaction                                                                                                                                                                 | Annotation method |
|------------------------------|-------------------------------------------------|-----------------|--------------------------------------------------------------------------------------------------------------------------------------------------------------------------------------|-------------------|
| AO090009000405               | Mitochondrial ADP/ATP carrier proteins          | ATP translocase | ADP + PI + ATPm + H <sub>2</sub> O <sub>m</sub> + H <sub>2</sub> PO <sub>4</sub> <sup>-</sup> -> ADPm + PIm + ATP + H <sub>2</sub> O + H <sub>2</sub> PO <sub>4</sub> <sup>-</sup> m | BLASTP            |
| <b># Sulfur metabolism</b>   |                                                 |                 |                                                                                                                                                                                      |                   |
| AO090038000333               | Adenylylsulfate kinase                          | 2.7.1.25        | APS + ATP -> ADP + PAPS                                                                                                                                                              | BLASTP            |
| AO090020000347               | 3'-phosphoadenosine-5'-phosphosulfate reductase | 1.8.4.8         | PAPS + RTHIO -> OTHIO + H <sub>2</sub> SO <sub>3</sub> + PAP                                                                                                                         | BLASTP            |
| AO090012000271               | Sulfite reductase (NADPH)                       | 1.8.1.2         | H <sub>2</sub> SO <sub>3</sub> + 3 NADPH -> H <sub>2</sub> S + 3 NADP + 3 H <sub>2</sub> O                                                                                           | BLASTP            |
| AO090005001313               | Sulfite reductase (NADPH)                       | 1.8.1.2         | H <sub>2</sub> SO <sub>3</sub> + 3 NADPH -> H <sub>2</sub> S + 3 NADP + 3 H <sub>2</sub> O                                                                                           | BLASTP            |
| AO090001000571               | Sulfite reductase (NADPH)                       | 1.8.1.2         | H <sub>2</sub> SO <sub>3</sub> + 3 NADPH -> H <sub>2</sub> S + 3 NADP + 3 H <sub>2</sub> O                                                                                           | BLASTP            |
| AO090102000277               | Sulfite oxidase                                 | 1.8.3.1         | H <sub>2</sub> SO <sub>3</sub> + O <sub>2</sub> + H <sub>2</sub> O -> SLF + H <sub>2</sub> O <sub>2</sub>                                                                            | BLASTP            |
| AO090020000232               | Sulfite oxidase                                 | 1.8.3.1         | H <sub>2</sub> SO <sub>3</sub> + O <sub>2</sub> + H <sub>2</sub> O -> SLF + H <sub>2</sub> O <sub>2</sub>                                                                            | BLASTP            |
| <b># Nitrogen metabolism</b> |                                                 |                 |                                                                                                                                                                                      |                   |
| AO090012000624               | Nitrite reductase                               | 1.7.1.4         | HNO <sub>2</sub> + 3 NADPH -> NH <sub>4</sub> OH + 3 NADP + H <sub>2</sub> O                                                                                                         | BLASTP            |
| AO090012000626               | Nitrate reductase (NADPH)                       | 1.7.1.3         | HNO <sub>3</sub> + NADPH -> HNO <sub>2</sub> + NADP + H <sub>2</sub> O                                                                                                               | BLASTP            |
| AO090003001472               | Nitrate reductase (NADH)                        | 1.7.1.1         | HNO <sub>3</sub> + NADH -> HNO <sub>2</sub> + NAD + H <sub>2</sub> O                                                                                                                 | BLASTP            |
| AO090003001473               | Nitrate reductase (NADH)                        | 1.7.1.1         | HNO <sub>3</sub> + NADH -> HNO <sub>2</sub> + NAD + H <sub>2</sub> O                                                                                                                 | BLASTP            |
| AO090005001159               | Urea amidolyase                                 | 6.3.4.6         | ATP + UREA + CO <sub>2</sub> + H <sub>2</sub> O -> ADP + PI + UREAC                                                                                                                  | BLASTP            |
| AO090010000596               | Allophanate hydrolase                           | 3.5.1.54        | UREAC -> 2 NH <sub>3</sub> + 2 CO <sub>2</sub>                                                                                                                                       | GFAOP             |
| AO090011000504               | Allantoinase                                    | 3.5.2.5         | ATN <-> ATT                                                                                                                                                                          | BLASTP            |
| AO090005001321               | Allantoicase                                    | 3.5.3.4         | ATTp <-> UGCp + UREAp                                                                                                                                                                | BLASTP            |
| AO090005000694               | Ureidoglycolate hydrolase                       | 4.3.2.3         | UGCp -> GLXp + UREAp                                                                                                                                                                 | BLASTP            |
| AO090003000879               | Urease                                          | 3.5.1.5         | UREA + H <sub>2</sub> O -> CO <sub>2</sub> + 2 NH <sub>3</sub>                                                                                                                       | GFAOP             |
| AO090020000571               | Nitrilase                                       | 3.5.5.1         | NITE -> CARBO + NH <sub>3</sub>                                                                                                                                                      | BLASTP            |
| AO090003000470               | Nitrilase                                       | 3.5.5.1         | NITE -> CARBO + NH <sub>3</sub>                                                                                                                                                      | BLASTP            |
| AO090020000385               | Nitrilase                                       | 3.5.5.1         | NITE -> CARBO + NH <sub>3</sub>                                                                                                                                                      | BLASTP            |
| AO090010000658               | 2-nitropropane dioxygenase                      | 1.13.11.32      | 2 NITROPRO + O <sub>2</sub> -> 2 ACET + 2 HNO <sub>2</sub>                                                                                                                           | BLASTP            |
| AO090011000650               | 2-nitropropane dioxygenase                      | 1.13.11.32      | 2 NITROPRO + O <sub>2</sub> -> 2 ACET + 2 HNO <sub>2</sub>                                                                                                                           | BLASTP            |
| AO090023000783               | 2-nitropropane dioxygenase                      | 1.13.11.32      | 2 NITROPRO + O <sub>2</sub> -> 2 ACET + 2 HNO <sub>2</sub>                                                                                                                           | BLASTP            |
| AO090103000286               | 2-nitropropane dioxygenase                      | 1.13.11.32      | 2 NITROPRO + O <sub>2</sub> -> 2 ACET + 2 HNO <sub>2</sub>                                                                                                                           | BLASTP            |
| AO090701000520               | 2-nitropropane dioxygenase                      | 1.13.11.32      | 2 NITROPRO + O <sub>2</sub> -> 2 ACET + 2 HNO <sub>2</sub>                                                                                                                           | BLASTP            |
| AO090038000173               | 2-nitropropane dioxygenase                      | 1.13.11.32      | 2 NITROPRO + O <sub>2</sub> -> 2 ACET + 2 HNO <sub>2</sub>                                                                                                                           | BLASTP            |

| Gene name      | Enzyme name                   | EC number | Biochemical reaction                                       | Annotation method |
|----------------|-------------------------------|-----------|------------------------------------------------------------|-------------------|
| No_Gene        | Chemical conversion           | No_EC     | NH <sub>3</sub> + H <sub>2</sub> O <-> NH <sub>4</sub> OH  | BLASTP            |
| AO090010000582 | Carbonic anhydrase            | 4.2.1.1   | CO <sub>2</sub> + H <sub>2</sub> O -> H + HCO <sub>3</sub> | BLASTP            |
| AO090102000190 | Cyanate lyase                 | 4.2.1.104 | CYNE + H <sub>2</sub> O -> CABM                            | BLASTP            |
| No_Gene        | Spontaneous conversion        | No_EC     | CABM -> CO <sub>2</sub> + NH <sub>3</sub>                  | BLASTP            |
| AO090010000710 | Methylaspartate ammonia-lyase | 4.3.1.2   | TRMAS -> MESC + NH <sub>3</sub>                            | BLASTP            |
| GAP            | Methylaspartate mutase        | 5.4.99.1  | GLU -> TRMAS                                               | NONE              |
| GAP            | Mesaconate hydratase          | 4.2.1.34  | MESC + H <sub>2</sub> O -> CML                             | NONE              |
| GAP            | Citramalate lyase             | 4.1.3.22  | CML -> AC + PYR                                            | NONE              |

### # 3. Amino acid metabolism

#### # Alanine/aspartate and asparagine metabolism

|                |                                             |          |                                                                                                  |        |
|----------------|---------------------------------------------|----------|--------------------------------------------------------------------------------------------------|--------|
| AO090011000679 | Aspartate transaminase                      | 2.6.1.1  | OAm + GLUm <-> ASPm + AKGm                                                                       | BLASTP |
| AO090003001171 | Aspartate transaminase                      | 2.6.1.1  | OAm + GLUm <-> ASPm + AKGm                                                                       | BLASTP |
| AO090120000135 | Aspartate transaminase                      | 2.6.1.1  | OAm + GLUm <-> ASPm + AKGm                                                                       | BLASTP |
| AO090120000135 | Aspartate transaminase                      | 2.6.1.1  | OA + GLU <-> ASP + AKG                                                                           | BLASTP |
| AO090003000931 | Aspartate transaminase                      | 2.6.1.1  | OA + GLU <-> ASP + AKG                                                                           | BLASTP |
| AO090012000899 | Aspartate transaminase                      | 2.6.1.1  | OA + GLU <-> ASP + AKG                                                                           | BLASTP |
| AO090003000164 | Alanine aminotransferase                    | 2.6.1.2  | PYR + GLU <-> AKG + ALA                                                                          | BLASTP |
| AO090003000164 | Alanine aminotransferase                    | 2.6.1.2  | PYRm + GLUm <-> AKGm + ALAm                                                                      | BLASTP |
| AO090020000619 | Cysteine desulfurase                        | 2.8.1.7  | CYSm + ECYSm -> ALAm + ESULFCYSm                                                                 | GFAOP  |
| AO090026000714 | D-aspartate oxidase                         | 1.4.3.1  | DASP + H <sub>2</sub> O + O <sub>2</sub> -> OA + NH <sub>3</sub> + H <sub>2</sub> O <sub>2</sub> | BLASTP |
| AO090005000816 | Asparaginase                                | 3.5.1.1  | ASN -> ASP + NH <sub>3</sub>                                                                     | BLASTP |
| AO090003000216 | Asparaginase                                | 3.5.1.1  | ASN -> ASP + NH <sub>3</sub>                                                                     | BLASTP |
| AO090023000896 | Asparagine synthase (glutamine-hydrolysing) | 6.3.5.4  | ASP + ATP + GLN -> GLU + ASN + AMP + PPI                                                         | BLASTP |
| AO090103000353 | Asparagine synthase (glutamine-hydrolysing) | 6.3.5.4  | ASP + ATP + GLN -> GLU + ASN + AMP + PPI                                                         | BLASTP |
| AO090120000180 | Asparagine synthase (glutamine-hydrolysing) | 6.3.5.4  | ASP + ATP + GLN -> GLU + ASN + AMP + PPI                                                         | BLASTP |
| AO090009000460 | Asparagine synthetase                       | 6.3.1.1  | ATP + ASP + NH <sub>3</sub> -> AMP + PPI + ASN                                                   | BLASTP |
| AO090020000314 | Aspartate-semialdehyde dehydrogenase        | 1.2.1.11 | BASP + NADPH -> NADP + PI + ASPSA                                                                | BLASTP |
| AO090009000702 | Aspartokinase                               | 2.7.2.4  | ASP + ATP -> ADP + BASP                                                                          | BLASTP |
| AO090026000404 | Carnitine O-acyltransferase                 | 2.3.1.7  | C120COA + CAR <-> C120CAR + COA                                                                  | BLASTP |
| AO090001000295 | Carnitine O-acyltransferase                 | 2.3.1.7  | C120COAm + CARm <-> C120CARm + COAm                                                              | BLASTP |
| AO090026000404 | Carnitine O-acyltransferase                 | 2.3.1.7  | C120COAm + CARm <-> C120CARm + COAm                                                              | BLASTP |

| Gene name                                | Enzyme name                        | EC number | Biochemical reaction                       | Annotation method |
|------------------------------------------|------------------------------------|-----------|--------------------------------------------|-------------------|
| AO090026000404                           | Carnitine O-acyltransferase        | 2.3.1.7   | C140COA + CAR <-> C140CAR + COA            | BLASTP            |
| AO090001000295                           | Carnitine O-acyltransferase        | 2.3.1.7   | C140COAm + CARm <-> C140CARm + COAm        | BLASTP            |
| AO090026000404                           | Carnitine O-acyltransferase        | 2.3.1.7   | C140COAm + CARm <-> C140CARm + COAm        | BLASTP            |
| AO090026000404                           | Carnitine O-acyltransferase        | 2.3.1.7   | C160COA + CAR <-> C160CAR + COA            | BLASTP            |
| AO090001000295                           | Carnitine O-acyltransferase        | 2.3.1.7   | C160COAm + CARm <-> C160CARm + COAm        | BLASTP            |
| AO090026000404                           | Carnitine O-acyltransferase        | 2.3.1.7   | C160COAm + CARm <-> C160CARm + COAm        | BLASTP            |
| AO090026000404                           | Carnitine O-acyltransferase        | 2.3.1.7   | C180COA + CAR <-> C180CAR + COA            | BLASTP            |
| AO090001000295                           | Carnitine O-acyltransferase        | 2.3.1.7   | C180COAm + CARm <-> C180CARm + COAm        | BLASTP            |
| AO090026000404                           | Carnitine O-acyltransferase        | 2.3.1.7   | C180COAm + CARm <-> C180CARm + COAm        | BLASTP            |
| AO090010000640                           | L-amino-acid oxidase               | 1.4.3.2   | ASP + H2O + O2 -> OA + NH3 + H2O2          | BLASTP            |
| AO090010000405                           | L-amino-acid oxidase               | 1.4.3.2   | ASP + H2O + O2 -> OA + NH3 + H2O2          | BLASTP            |
| AO090103000001                           | Alanyl-tRNA synthetase             | 6.1.1.7   | ATP + ALA + TRNA -> AMP + PPI + LAlaTRNA   | BLASTP            |
| AO090005000838                           | Aspartyl-tRNA synthetase           | 6.1.1.12  | ATP + ASP + TRNA -> AMP + PPI + ASPTRNA    | BLASTP            |
| AO090005000838                           | Aspartyl-tRNA synthetase           | 6.1.1.12  | ATPm + ASPm + TRNA -> AMPm + PPI + ASPTRNA | BLASTP            |
| AO090026000603                           | Aspartyl-tRNA synthetase           | 6.1.1.12  | ATP + ASP + TRNA -> AMP + PPI + ASPTRNA    | BLASTP            |
| AO090023000726                           | Aspartyl-tRNA synthetase           | 6.1.1.12  | ATP + ASP + TRNA -> AMP + PPI + ASPTRNA    | BLASTP            |
| AO090005001286                           | Asparaginyl-tRNA synthetase        | 6.1.1.22  | ATPm + ASNm + TRNA -> AMPm + PPI + ASNTRNA | BLASTP            |
| AO090001000680                           | Asparaginyl-tRNA synthetase        | 6.1.1.22  | ATP + ASN + TRNA -> AMP + PPI + ASNTRNA    | BLASTP            |
| ZY110993                                 | Alanine racemase                   | 5.1.1.1   | DALA <-> ALA                               | EST               |
| <b># Arginine and proline metabolism</b> |                                    |           |                                            |                   |
| AO090102000577                           | S-adenosylmethionine decarboxylase | 4.1.1.50  | SAM <-> DSAM + CO2                         | BLASTP            |
| AO090012000528                           | Spermidine synthase                | 2.5.1.16  | PTRSC + DSAM -> SPRMD + 5MTA               | BLASTP            |
| AO090012000528                           | Spermine synthase                  | 2.5.1.22  | DSAM + SPRMD -> 5MTA + SPRM                | BLASTP            |
| AO090003001350                           | Deoxyhypusine synthase             | 1.5.99.6  | SPRMD + Qm -> DAPRP + QH2m                 | BLASTP            |
| AO090701000729                           | N-acetylglutamate synthase         | 2.3.1.1   | GLUm + ACCOAm -> COAm + NAGLUm             | BLASTP            |
| AO090026000498                           | Acetylglutamate kinase             | 2.7.2.8   | NAGLUm + ATPm -> ADPm + NAGLUPm            | BLASTP            |
| AO090026000149                           | Acetylglutamate kinase             | 2.7.2.8   | NAGLUm + ATPm -> ADPm + NAGLUPm            | BLASTP            |
| ZY111420                                 | Acetylglutamate kinase             | 2.7.2.8   | NAGLUm + ATPm -> ADPm + NAGLUPm            | EST               |
| ZY086694                                 | Acetylglutamate kinase             | 2.7.2.8   | NAGLUm + ATPm -> ADPm + NAGLUPm            | EST               |

| Gene name                                            | Enzyme name                                      | EC number | Biochemical reaction                      | Annotation method |
|------------------------------------------------------|--------------------------------------------------|-----------|-------------------------------------------|-------------------|
| Chr 4: SC012<br>(1076984-1077358)                    | N-acetyl- $\gamma$ -glutamyl-phosphate reductase | 1.2.1.38  | NAGLUPm + NADPHm -> NADPm + PIm + NAGLUSm | GFAOP             |
| AO090026000394                                       | Acetylmithine aminotransferase                   | 2.6.1.11  | NAGLUSm + GLUm -> AKGm + NAORNm           | BLASTP            |
| AO090005001109                                       | Acetylmithine deacetylase                        | 3.5.1.16  | NAORN + H2O -> AC + ORN                   | GFAOP             |
| AO090005001108                                       | Acetylmithine deacetylase                        | 3.5.1.16  | NAORN + H2O -> AC + ORN                   | GFAOP             |
| AO090003000058                                       | Acetylmithine deacetylase                        | 3.5.1.16  | NAORN + H2O -> AC + ORN                   | GFAOP             |
| AO090023000856                                       | Ornithine carbamoyltransferase                   | 2.1.3.3   | ORNm + CAPm -> CITRm + PIm                | BLASTP            |
| AO090023000395                                       | Argininosuccinate synthase                       | 6.3.4.5   | CITR + ASP + ATP <-> AMP + PPI + ARGSUCC  | BLASTP            |
| AO090020000418                                       | Argininosuccinate lyase                          | 4.3.2.1   | ARGSUCC <-> FUM + ARG                     | BLASTP            |
| AO090003000697                                       | Arginase                                         | 3.5.3.1   | ARG -> ORN + UREA                         | BLASTP            |
| AO090011000557                                       | Arginase                                         | 3.5.3.1   | ARG -> ORN + UREA                         | BLASTP            |
| GAP                                                  | Arginine decarboxylase                           | 4.1.1.19  | ARG -> AGMT + CO2                         | NONE              |
| AO090001000694/<br>AO090120000455/<br>AO090701000422 | Agmatinase                                       | 3.5.3.11  | AGMT + H2O -> PTRSC + UREA                | BLASTP            |
| AO090011000935                                       | Glutamate 5-kinase                               | 2.7.2.11  | GLU + ATP -> ADP + GLUP                   | BLASTP            |
| AO090011000955                                       | Gamma-glutamyl phosphate reductase               | 1.2.1.41  | GLUP + NADPH -> NADP + PI + GLUGSAL       | BLASTP            |
| No_Gene                                              | Spontaneous conversion                           | No_EC     | GLUGSALm <-> P5Cm + H2Om                  | NONE              |
| No_Gene                                              | Spontaneous conversion                           | No_EC     | GLUGSAL <-> P5C + H2O                     | NONE              |
| AO090001000550                                       | Proline dehydrogenase                            | 1.5.99.8  | PROm + FADm -> P5Cm + FADH2m              | BLASTP            |
| AO090003000761                                       | Proline hydroxylase                              | 1.14.11.2 | PRO + AKG + O2 -> HPRO + SUCC + CO2       | BLASTP            |
| AO090001000549                                       | Delta-1-Pyrroline-5-carboxylate dehydrogenase    | 1.5.1.12  | HPROm + NADm -> PHCm + NADHm              | BLASTP            |
| AO090206000121                                       | Delta-1-Pyrroline-5-carboxylate dehydrogenase    | 1.5.1.12  | HPROm + NADm -> PHCm + NADHm              | BLASTP            |
| AO090005000037                                       | Delta-1-Pyrroline-5-carboxylate dehydrogenase    | 1.5.1.12  | HPROm + NADm -> PHCm + NADHm              | BLASTP            |
| AO090012000606                                       | Delta-1-Pyrroline-5-carboxylate dehydrogenase    | 1.5.1.12  | HPROm + NADm -> PHCm + NADHm              | BLASTP            |
| AO090001000549                                       | Delta-1-Pyrroline-5-carboxylate dehydrogenase    | 1.5.1.12  | GLUGSALm + NADPm -> NADPHm + GLUm         | BLASTP            |
| AO090206000121                                       | Delta-1-Pyrroline-5-carboxylate dehydrogenase    | 1.5.1.12  | GLUGSALm + NADPm -> NADPHm + GLUm         | BLASTP            |
| AO090005000037                                       | Delta-1-Pyrroline-5-carboxylate dehydrogenase    | 1.5.1.12  | GLUGSALm + NADPm -> NADPHm + GLUm         | BLASTP            |
| AO090012000606                                       | Delta-1-Pyrroline-5-carboxylate dehydrogenase    | 1.5.1.12  | GLUGSALm + NADPm -> NADPHm + GLUm         | BLASTP            |
| AO090012000119                                       | Pyrroline-5-carboxylate reductase                | 1.5.1.2   | P5C + NADPH -> PRO + NADP                 | BLASTP            |

| Gene name      | Enzyme name                       | EC number  | Biochemical reaction                     | Annotation method |
|----------------|-----------------------------------|------------|------------------------------------------|-------------------|
| AO09012000046  | Pyrroline-5-carboxylate reductase | 1.5.1.2    | P5C + NADPH -> PRO + NADP                | BLASTP            |
| AO090005000035 | Pyrroline-5-carboxylate reductase | 1.5.1.2    | P5C + NADPH -> PRO + NADP                | BLASTP            |
| AO090206000124 | Pyrroline-5-carboxylate reductase | 1.5.1.2    | P5C + NADPH -> PRO + NADP                | BLASTP            |
| AO090012000119 | Pyrroline-5-carboxylate reductase | 1.5.1.2    | PHC + NADPH -> HPRO + NADP               | BLASTP            |
| AO09012000046  | Pyrroline-5-carboxylate reductase | 1.5.1.2    | PHC + NADPH -> HPRO + NADP               | BLASTP            |
| AO090005000035 | Pyrroline-5-carboxylate reductase | 1.5.1.2    | PHC + NADPH -> HPRO + NADP               | BLASTP            |
| AO090206000124 | Pyrroline-5-carboxylate reductase | 1.5.1.2    | PHC + NADPH -> HPRO + NADP               | BLASTP            |
| AO090012000119 | Pyrroline-5-carboxylate reductase | 1.5.1.2    | PHC + NADH -> HPRO + NAD                 | BLASTP            |
| AO09012000046  | Pyrroline-5-carboxylate reductase | 1.5.1.2    | PHC + NADH -> HPRO + NAD                 | BLASTP            |
| AO090005000035 | Pyrroline-5-carboxylate reductase | 1.5.1.2    | PHC + NADH -> HPRO + NAD                 | BLASTP            |
| AO090206000124 | Pyrroline-5-carboxylate reductase | 1.5.1.2    | PHC + NADH -> HPRO + NAD                 | BLASTP            |
| AO090010000012 | Proline racemase                  | 5.1.1.4    | PRO -> DPRO                              | BLASTP            |
| AO090010000067 | Proline racemase                  | 5.1.1.4    | PRO -> DPRO                              | BLASTP            |
| AO090103000370 | Proline racemase                  | 5.1.1.4    | PRO -> DPRO                              | BLASTP            |
| AO090701000729 | Glutamate N-acetyltransferase     | 2.3.1.35   | NAORNm + GLUm -> ORNm + NAGLUm           | NONE              |
| AO090023000546 | Ornithine aminotransferase        | 2.6.1.13   | ORN + AKG -> GLUGSAL + GLU               | BLASTP            |
| AO090023000628 | Ornithine aminotransferase        | 2.6.1.13   | ORN + AKG -> GLUGSAL + GLU               | BLASTP            |
| AO090023000771 | Ornithine decarboxylase           | 4.1.1.17   | ORN -> PTRSC + CO2                       | BLASTP            |
| AO090038000189 | Ornithine decarboxylase           | 4.1.1.17   | ORN -> PTRSC + CO2                       | BLASTP            |
| AO090026000097 | Ornithine decarboxylase           | 4.1.1.17   | ORNm -> PTRSCm + CO2m                    | GFAOP             |
| AO090026000380 | Ornithine decarboxylase           | 4.1.1.17   | ORN -> PTRSC + CO2                       | BLASTP            |
| AO090701000513 | Ornithine decarboxylase           | 4.1.1.17   | ORNm -> PTRSCm + CO2m                    | GFAOP             |
| AO090138000170 | Nitric-oxide synthase             | 1.14.13.39 | ARG + NADPH + H + O2 -> CITR + NO + NADP | BLASTP            |
| AO090026000140 | Arginyl-tRNA synthetase           | 6.1.1.19   | ATP + ARG + TRNA -> AMP + PPI + ALTRNA   | BLASTP            |
| AO090012000200 | Prolyl-tRNA synthetase            | 6.1.1.15   | ATP + PRO + TRNA -> AMP + PPI + LPROTRNA | BLASTP            |
| AO090038000342 | Prolyl-tRNA synthetase            | 6.1.1.15   | ATP + PRO + TRNA -> AMP + PPI + LPROTRNA | BLASTP            |

| Gene name                                   | Enzyme name                                     | EC number  | Biochemical reaction                     | Annotation method |
|---------------------------------------------|-------------------------------------------------|------------|------------------------------------------|-------------------|
| <b># Cysteine metabolism</b>                |                                                 |            |                                          |                   |
| AO090120000210                              | Homoserine O-acetyltransferase                  | 2.3.1.30   | SER + ACCOA -> COA + ASER                | BLASTP            |
| AO090701000235                              | Homoserine O-acetyltransferase                  | 2.3.1.30   | SER + ACCOA -> COA + ASER                | BLASTP            |
| AO090020000347                              | 3'-phosphoadenosine-5'-phosphosulfate reductase | 1.8.4.8    | PAPS + RTHIO -> OTHIO + H2SO3 + PAP      | BLASTP            |
| AO090005000626                              | Cysteine synthase                               | 2.5.1.47   | ASERm + H2Sm -> ACm + CYSm               | BLASTP            |
| AO090102000276                              | Cysteine synthase                               | 2.5.1.47   | ASERm + H2Sm -> ACm + CYSm               | BLASTP            |
| AO090011000336                              | Cysteine synthase                               | 2.5.1.47   | ASER + H2S -> AC + CYS                   | BLASTP            |
| AO090001000584                              | 3'(2',5')-bisphosphate nucleotidase             | 3.1.3.7    | PAP -> AMP + PI                          | GFAOP             |
| AO090206000077                              | 3'(2',5')-bisphosphate nucleotidase             | 3.1.3.7    | PAP -> AMP + PI                          | GFAOP             |
| AO090011000904                              | 3'(2',5')-bisphosphate nucleotidase             | 3.1.3.7    | PAP -> AMP + PI                          | GFAOP             |
| AO090011000009                              | Cysteine dioxygenase                            | 1.13.11.20 | CYS + O2 -> 3SULALA                      | GFAOP             |
| AO090020000659                              | Cysteine dioxygenase                            | 1.13.11.20 | CYS + O2 -> 3SULALA                      | GFAOP             |
| AO090009000384                              | Cysteine dioxygenase                            | 1.13.11.20 | CYS + O2 -> 3SULALA                      | GFAOP             |
| AO090005000162                              | Sulfhydryl oxidase                              | 1.8.3.2    | 2 CYS + O2 -> CYST + H2O                 | BLASTP            |
| AO090005000642                              | sulfate adenyltransferase (ADP)                 | 2.7.7.5    | ADP + SLF <-> PI + APS                   | BLASTP            |
| AO090020000349                              | ATP sulphurylase                                | 2.7.7.4    | SLF + ATP -> PPI + APS                   | BLASTP            |
| AO090009000342                              | L-serine dehydratase                            | 4.3.1.17   | SER -> PYR + NH3                         | BLASTP            |
| AO090023000790                              | L-serine dehydratase                            | 4.3.1.17   | SER -> PYR + NH3                         | BLASTP            |
| AO090023000163                              | Cysteinyl-tRNA synthetase                       | 6.1.1.16   | ATP + CYS + TRNA -> AMP + PPI + LCysTRNA | BLASTP            |
| <b># Glutamate and glutamine metabolism</b> |                                                 |            |                                          |                   |
| AO090103000342                              | Glutamate decarboxylase                         | 4.1.1.15   | GLU -> GABA + CO2                        | BLASTP            |
| AO090005000539                              | Glutamate decarboxylase                         | 4.1.1.15   | GLU -> GABA + CO2                        | BLASTP            |
| AO090003000666                              | Glutamate decarboxylase                         | 4.1.1.15   | GLU -> GABA + CO2                        | BLASTP            |
| AO090005000704                              | Glutamate decarboxylase                         | 4.1.1.15   | GLU -> GABA + CO2                        | BLASTP            |
| AO090009000135                              | Succinate-semialdehyde dehydrogenase            | 1.2.1.16   | SUCCSAL + NAD + H2O -> SUCC + NADH       | BLASTP            |
| AO090023000754                              | Succinate-semialdehyde dehydrogenase            | 1.2.1.16   | SUCCSAL + NAD + H2O -> SUCC + NADH       | BLASTP            |
| AO090005001383                              | Succinate-semialdehyde dehydrogenase            | 1.2.1.16   | SUCCSAL + NAD + H2O -> SUCC + NADH       | BLASTP            |
| AO090020000216                              | Succinate-semialdehyde dehydrogenase            | 1.2.1.16   | SUCCSAL + NAD + H2O -> SUCC + NADH       | BLASTP            |
| AO090009000135                              | Succinate-semialdehyde dehydrogenase            | 1.2.1.16   | SUCCSAL + NADP -> SUCC + NADPH           | BLASTP            |
| AO090023000754                              | Succinate-semialdehyde dehydrogenase            | 1.2.1.16   | SUCCSAL + NADP -> SUCC + NADPH           | BLASTP            |
| AO090005001383                              | Succinate-semialdehyde dehydrogenase            | 1.2.1.16   | SUCCSAL + NADP -> SUCC + NADPH           | BLASTP            |



| Gene name      | Enzyme name                                       | EC number | Biochemical reaction                                                               | Annotation method |
|----------------|---------------------------------------------------|-----------|------------------------------------------------------------------------------------|-------------------|
| AO09002000216  | Succinate-semialdehyde dehydrogenase              | 1.2.1.16  | SUCCSAL + NADP -> SUCC + NADPH                                                     | BLASTP            |
| AO090012000988 | NADPH-dependent glutamate synthase                | 1.4.1.13  | AKG + GLN + NADPH -> NADP + 2 GLU                                                  | BLASTP            |
| AO090001000717 | NAD-dependent glutamate dehydrogenase             | 1.4.1.2   | GLU + NAD <-> AKG + NH3 + NADH                                                     | BLASTP            |
| AO090001000717 | NAD-dependent glutamate dehydrogenase             | 1.4.1.2   | GLUm + NADm <-> AKGm + NH3m + NADHm                                                | BLASTP            |
| AO090023000923 | Glutamate dehydrogenase                           | 1.4.1.4   | GLU + NADP + H2O <-> AKG + NH3 + NADPH                                             | BLASTP            |
| AO090023000579 | Glutamate dehydrogenase                           | 1.4.1.4   | GLU + NADP + H2O <-> AKG + NH3 + NADPH                                             | BLASTP            |
| AO090120000132 | Glucosamine-phosphate N-acetyltransferase         | 2.3.1.4   | ACCOA + GA6P <-> COA + NAGA6P                                                      | GFAOP             |
| AO090023000785 | Glucosamine-phosphate N-acetyltransferase         | 2.3.1.4   | ACCOA + GA6P <-> COA + NAGA6P                                                      | GFAOP             |
| AO090001000429 | N-acetylglucosamine-phosphate mutase              | 5.4.2.3   | NAGA6P <-> NAGA1P                                                                  | BLASTP            |
| AO090701000206 | 4-aminobutyrate aminotransferase                  | 2.6.1.19  | GABAm + AKGm -> SUCCSALm + GLUm                                                    | BLASTP            |
| AO090009000269 | Glutamine synthetase                              | 6.3.1.2   | GLU + NH3 + ATP -> GLN + ADP + PI                                                  | BLASTP            |
| AO090009000558 | Glutamine synthetase                              | 6.3.1.2   | GLU + NH3 + ATP -> GLN + ADP + PI                                                  | BLASTP            |
| AO090026000090 | Glutamine synthetase                              | 6.3.1.2   | GLU + NH3 + ATP -> GLN + ADP + PI                                                  | BLASTP            |
| AO090011000308 | Glutamine synthetase                              | 6.3.1.2   | GLU + NH3 + ATP -> GLN + ADP + PI                                                  | BLASTP            |
| AO090020000289 | Glutaminase                                       | 3.5.1.2   | GLN -> GLU + NH3                                                                   | BLASTP            |
| AO090003000638 | Glutaminase                                       | 3.5.1.2   | GLN -> GLU + NH3                                                                   | BLASTP            |
| AO090001000625 | Glutaminase                                       | 3.5.1.2   | GLN -> GLU + NH3                                                                   | BLASTP            |
| AO090001000626 | Glutaminase                                       | 3.5.1.2   | GLN -> GLU + NH3                                                                   | BLASTP            |
| AO090003000003 | Glucosamine-fructose-6-phosphate aminotransferase | 2.6.1.16  | GLN + F6P -> GLU + GA6P                                                            | BLASTP            |
| AO090003001475 | Glucosamine-fructose-6-phosphate aminotransferase | 2.6.1.16  | GLN + F6P -> GLU + GA6P                                                            | BLASTP            |
| AO090102000234 | Glutamyl-tRNA synthetase                          | 6.1.1.17  | ATPm + GLUm + TRNA <sub>m</sub> -> AMPm + PPI <sub>m</sub> + LGLUTRNA <sub>m</sub> | BLASTP            |
| AO090102000566 | Glutamyl-tRNA synthetase                          | 6.1.1.17  | ATP + GLU + TRNA -> AMP + PPI + LGLUTRNA                                           | BLASTP            |
| AO090701000597 | Glutaminyl-tRNA synthetase                        | 6.1.1.18  | ATP + GLN + TRNA -> AMP + PPI + LGLNTRNA                                           | BLASTP            |
| AO090003000698 | Glutaminyl-tRNA synthetase                        | 6.1.1.18  | ATPm + GLNm + TRNA <sub>m</sub> -> AMPm + PPI <sub>m</sub> + LGLNTRNA <sub>m</sub> | BLASTP            |



| Gene name                                         | Enzyme name                         | EC number | Biochemical reaction                                | Annotation method |
|---------------------------------------------------|-------------------------------------|-----------|-----------------------------------------------------|-------------------|
| <b># Glycine, serine and threonine metabolism</b> |                                     |           |                                                     |                   |
| AO090020000670                                    | Phosphoglycerate dehydrogenase      | 1.1.1.95  | 3PG + NAD -> NADH + PHP                             | BLASTP            |
| AO090009000711                                    | Phosphoglycerate dehydrogenase      | 1.1.1.95  | 3PG + NAD -> NADH + PHP                             | BLASTP            |
| AO090020000668                                    | Phosphoglycerate dehydrogenase      | 1.1.1.95  | 3PG + NAD -> NADH + PHP                             | BLASTP            |
| AO090001000641                                    | Phosphoglycerate dehydrogenase      | 1.1.1.95  | 3PG + NAD -> NADH + PHP                             | BLASTP            |
| ZY083916                                          | Phosphoglycerate dehydrogenase      | 1.1.1.95  | 3PG + NAD -> NADH + PHP                             | EST               |
| ZY007726                                          | Phosphoglycerate dehydrogenase      | 1.1.1.95  | 3PG + NAD -> NADH + PHP                             | EST               |
| AO090023000099                                    | Phosphoserine aminotransferase      | 2.6.1.52  | PHP + GLU -> AKG + 3PSER                            | GFAOP             |
| AO090009000301                                    | Phosphoserine phosphatase           | 3.1.3.3   | 3PSER -> PI + SER                                   | BLASTP            |
| AO090020000345                                    | Phosphoserine phosphatase           | 3.1.3.3   | 3PSER -> PI + SER                                   | BLASTP            |
| AO090308000017                                    | Phosphoserine phosphatase           | 3.1.3.3   | 3PSER -> PI + SER                                   | BLASTP            |
| AO090012000926                                    | Alanine-glyoxylate aminotransferase | 2.6.1.44  | ALAm + GLXm <-> PYRm + GLYm                         | BLASTP            |
| AO090308000018                                    | Alanine-glyoxylate aminotransferase | 2.6.1.44  | ALA + GLX <-> PYR + GLY                             | GFAOP             |
| AO090020000641                                    | Alanine-glyoxylate aminotransferase | 2.6.1.44  | ALA + GLX <-> PYR + GLY                             | GFAOP             |
| AO090003000721                                    | Homoserine dehydrogenase            | 1.1.1.3   | ASPSA + NADPH -> NADP + HSER                        | BLASTP            |
| AO090009000136                                    | Homoserine dehydrogenase            | 1.1.1.3   | ASPSA + NADPH -> NADP + HSER                        | BLASTP            |
| AO090003000721                                    | Homoserine dehydrogenase            | 1.1.1.3   | ASPSA + NADH -> NAD + HSER                          | BLASTP            |
| AO090009000136                                    | Homoserine dehydrogenase            | 1.1.1.3   | ASPSA + NADH -> NAD + HSER                          | BLASTP            |
| AO090009000682                                    | Homoserine kinase                   | 2.7.1.39  | HSER + ATP -> ADP + PHSER                           | BLASTP            |
| AO090038000224                                    | Threonine synthase                  | 4.2.3.1   | PHSER + H2O -> PI + THR                             | BLASTP            |
| AO090005000497                                    | Threonine aldolase                  | 4.1.2.5   | THR -> GLY + ACAL                                   | BLASTP            |
| AO090012000408                                    | Threonine aldolase                  | 4.1.2.5   | THR -> GLY + ACAL                                   | BLASTP            |
| AO090011000351                                    | Glycine dehydrogenase               | 1.4.4.2   | GLYm + LIPOm <-> SAPm + CO2m                        | BLASTP            |
| AO090038000338                                    | Aminomethyltransferase              | 2.1.2.10  | GLYm + THFm + NADm -> METTHFm + NADHm + CO2m + NH3m | BLASTP            |
| AO090038000338                                    | Aminomethyltransferase              | 2.1.2.10  | GLY + THF + NAD -> METTHF + NADH + CO2 + NH3        | BLASTP            |
| AO090012000211                                    | Threonine dehydrogenase             | 1.1.1.103 | THR + NAD -> AMOXOBU + NADH                         | BLASTP            |
| AO090023000523                                    | Threonine dehydrogenase             | 1.1.1.103 | THR + NAD -> AMOXOBU + NADH                         | BLASTP            |

| Gene name                         | Enzyme name                              | EC number | Biochemical reaction                             | Annotation method |
|-----------------------------------|------------------------------------------|-----------|--------------------------------------------------|-------------------|
| No_Gene                           | Spontaneous conversion                   | No_EC     | AMOXOBU -> AMAC + CO2                            | BLASTP            |
| AO090003000775                    | Amine oxidase                            | 1.4.3.4   | AMACm + H2Om + O2m -> MTHGXLm + NH3m + H2O2m     | BLASTP            |
| AO090113000186                    | Amine oxidase                            | 1.4.3.4   | AMACm + H2Om + O2m -> MTHGXLm + NH3m + H2O2m     | BLASTP            |
| AO090103000118                    | Amine oxidase                            | 1.4.3.4   | AMACm + H2Om + O2m -> MTHGXLm + NH3m + H2O2m     | BLASTP            |
| AO090023000744                    | Amine oxidase                            | 1.4.3.4   | AMACm + H2Om + O2m -> MTHGXLm + NH3m + H2O2m     | BLASTP            |
| AO090166000103                    | Amine oxidase                            | 1.4.3.4   | AMACm + H2Om + O2m -> MTHGXLm + NH3m + H2O2m     | BLASTP            |
| AO090011000247                    | Amine oxidase                            | 1.4.3.4   | AMACm + H2Om + O2m -> MTHGXLm + NH3m + H2O2m     | BLASTP            |
| AO090009000288                    | Amine oxidase                            | 1.4.3.4   | AMACm + H2Om + O2m -> MTHGXLm + NH3m + H2O2m     | BLASTP            |
| AO090103000401                    | Copper amine oxidase                     | 1.4.3.6   | AMAC + H2O + O2 -> MTHGXL + NH3 + H2O2           | BLASTP            |
| AO090003000356                    | Copper amine oxidase                     | 1.4.3.6   | AMAC + H2O + O2 -> MTHGXL + NH3 + H2O2           | BLASTP            |
| AO090005000103                    | Copper amine oxidase                     | 1.4.3.6   | AMAC + H2O + O2 -> MTHGXL + NH3 + H2O2           | BLASTP            |
| AO090701000307                    | Copper amine oxidase                     | 1.4.3.6   | AMAC + H2O + O2 -> MTHGXL + NH3 + H2O2           | BLASTP            |
| AO090138000079                    | Copper amine oxidase                     | 1.4.3.6   | AMAC + H2O + O2 -> MTHGXL + NH3 + H2O2           | BLASTP            |
| AO090701000490                    | Copper amine oxidase                     | 1.4.3.6   | AMAC + H2O + O2 -> MTHGXL + NH3 + H2O2           | BLASTP            |
| AO090011000229                    | Copper amine oxidase                     | 1.4.3.6   | AMAC + H2O + O2 -> MTHGXL + NH3 + H2O2           | BLASTP            |
| AO090120000309                    | Choline dehydrogenase                    | 1.1.99.1  | CHO + FADm -> BETALD + FADH2m                    | BLASTP            |
| AO090103000021                    | Betaine aldehyde dehydrogenase           | 1.2.1.8   | BETALD + NAD + H2O -> GLYBET + NADH              | BLASTP            |
| AO090701000172                    | Betaine aldehyde dehydrogenase           | 1.2.1.8   | BETALD + NAD + H2O -> GLYBET + NADH              | BLASTP            |
| GAP                               | Betaine—homocysteine S-methyltransferase | 2.1.1.5   | GLYBET + HCYS -> DIMEGLY + MET                   | NONE              |
| AO090023000142                    | N,N-dimethylglycine oxidase              | 1.5.99.2  | DIMEGLYm + FADm + H2Om -> SARCm + FALDm + FADH2m | BLASTP            |
| AO090038000193/<br>AO090003000547 | Sarcosine oxidase                        | 1.5.3.1   | SARC + H2O + O2 -> GLY + FALD + H2O2             | BLASTP            |

| Gene name                                                               | Enzyme name                             | EC number | Biochemical reaction                            | Annotation method |
|-------------------------------------------------------------------------|-----------------------------------------|-----------|-------------------------------------------------|-------------------|
| AO090011000931                                                          | Cystathionine beta-synthase             | 4.2.1.22  | SER + HCYS -> LLCT                              | BLASTP            |
| AO090038000174                                                          | Threonine dehydratase                   | 4.3.1.19  | THR -> OBUT + NH3                               | GFAOP             |
| AO090023000756                                                          | Threonine dehydratase                   | 4.3.1.19  | THRm -> OBUTm + NH3m                            | BLASTP            |
| AO090005000706                                                          | Seryl-tRNA synthetase                   | 6.1.1.11  | ATP + SER + TRNA -> AMP + PPI + LSERTRNA        | BLASTP            |
| AO090009000712                                                          | Seryl-tRNA synthetase                   | 6.1.1.11  | ATP + SER + TRNA -> AMP + PPI + LSERTRNA        | BLASTP            |
| AO090009000672                                                          | Glycyl-tRNA synthetase                  | 6.1.1.14  | ATP + GLY + TRNA -> AMP + PPI + GLYTRNA         | BLASTP            |
| AO090005001088                                                          | Threonyl tRNA synthetase                | 6.1.1.3   | ATPm + THRm + TRNAm -> AMPm + PPIIm + LTHETRNAm | BLASTP            |
| AO090009000201                                                          | Threonyl tRNA synthetase                | 6.1.1.3   | ATP + THR + TRNA -> AMP + PPI + LTHETRNA        | BLASTP            |
| ZY140875                                                                | Selenocysteine synthase                 | 2.9.1.1   | LSERTRNA + SNPI -> LSECTRNA + H2O + PI          | EST               |
| <b># Histidine metabolism</b>                                           |                                         |           |                                                 |                   |
| AO090001000740                                                          | Glutamine amidotransferase:cyclase      | 2.4.2.-   | PRLP + GLN -> GLU + AICAR + DIMGP               | BLASTP            |
| AO090005000719/<br>AO090120000326/<br>AO090001000559/<br>AO090005000352 | HNRNP arginine N-methyltransferase      | 2.1.1.-   | SAM + HIS -> SAH + MHIS                         | BLASTP            |
| AO090005000694                                                          | Ureidoglycolate hydrolase               | 3.5.3.19  | UGC <-> GLX + 2 NH3 + CO2                       | BLASTP            |
| AO090009000641                                                          | 5-proFAR isomerase                      | 5.3.1.16  | PRFP -> PRLP                                    | BLASTP            |
| AO090005000146                                                          | Histidinol dehydrogenase                | 3.6.1.31  | PRBATP -> PPI + PRBAMP                          | BLASTP            |
| AO090005000146                                                          | Histidinol dehydrogenase                | 3.5.4.19  | PRBAMP -> PRFP                                  | BLASTP            |
| AO090701000070                                                          | Imidazoleglycerol-phosphate dehydratase | 4.2.1.19  | DIMGP -> IMACP                                  | BLASTP            |
| AO090012000450                                                          | Histidinol-phosphate aminotransferase   | 2.6.1.9   | IMACP + GLU -> AKG + HISOLP                     | BLASTP            |
| AO090206000105                                                          | Histidinol-phosphatase                  | 3.1.3.15  | HISOLP -> PI + HISOL                            | BLASTP            |
| AO090010000720                                                          | Histidinol-phosphatase                  | 3.1.3.15  | HISOLP -> PI + HISOL                            | BLASTP            |
| AO090005000146                                                          | Histidinol dehydrogenase                | 1.1.1.23  | HISOL + 2 NAD -> HIS + 2 NADH                   | BLASTP            |
| AO090005000135                                                          | ATP phosphoribosyltransferase           | 2.4.2.17  | PRPP + ATP -> PPI + PRBATP                      | BLASTP            |
| GAP                                                                     | Histidine ammonia-lyase                 | 4.3.1.3   | HIS -> NH3 + UROCA                              | NONE              |
| GAP                                                                     | Urocanate hydratase                     | 4.2.1.49  | UROCA + H2O -> IMIPRO                           | NONE              |
| AO090001000184                                                          | Imidazolonepropionase                   | 3.5.2.7   | IMIPRO + H2O -> FORGLU                          | GFAOP             |
| AO090003000932                                                          | Imidazolonepropionase                   | 3.5.2.7   | IMIPRO + H2O -> FORGLU                          | GFAOP             |
| GAP                                                                     | Formimidoylglutamase                    | 3.5.3.8   | FORGLU + H2O -> GLU + FORMIE                    | NONE              |

| Gene name                                                                                                     | Enzyme name                                | EC number | Biochemical reaction                   | Annotation method |
|---------------------------------------------------------------------------------------------------------------|--------------------------------------------|-----------|----------------------------------------|-------------------|
| AO090009000295                                                                                                | Histidyl-tRNA synthetase                   | 6.1.1.21  | ATP + HIS + TRNA -> AMP + PPI + HHTRNA | BLASTP            |
| <b># Valine, leucine and isoleucine metabolism (Branched-chain amino acids)</b>                               |                                            |           |                                        |                   |
| AO090023000977/<br>AO090011000598/<br>AO090005000936/<br>AO090011000044/<br>AO090011000598/<br>AO090023000123 | Branched chain amino acid aminotransferase | 2.6.1.42  | AKGm + ILEm <-> OMVALm + GLUm          | BLASTP            |
| AO090023000977/<br>AO090011000598/<br>AO090005000936/<br>AO090011000044/<br>AO090011000598/<br>AO090023000123 | Branched chain amino acid aminotransferase | 2.6.1.42  | AKGm + VALm <-> OIVALm + GLUm          | BLASTP            |
| AO090023000977/<br>AO090011000598/<br>AO090005000936/<br>AO090011000044/<br>AO090011000598/<br>AO090023000123 | Branched chain amino acid aminotransferase | 2.6.1.42  | AKGm + LEUm <-> OICAPm + GLUm          | BLASTP            |
| AO090023000854/<br>AO090003000571/<br>AO090166000076/<br>ZY098280                                             | Acetolactate synthase                      | 2.2.1.6   | OBUTm + PYRm -> ABUTm + CO2m           | EST, GFAOP        |
| AO090023000854/<br>AO090003000571/<br>AO090166000076/<br>ZY098280                                             | Acetolactate synthase                      | 2.2.1.6   | 2 PYRm -> CO2m + ACLACm                | EST, GFAOP        |

| Gene name                         | Enzyme name                            | EC number                     | Biochemical reaction                             | Annotation method |
|-----------------------------------|----------------------------------------|-------------------------------|--------------------------------------------------|-------------------|
| AO090701000557                    | Ketol-acid reductoisomerase            | 1.1.1.86                      | ACLACm + NADPHm -> NADPm + DHVALm                | BLASTP            |
| AO090701000557                    | Ketol-acid reductoisomerase            | 1.1.1.86                      | ABUTm + NADPHm -> NADPm + DHMVAm                 | BLASTP            |
| AO090010000053                    | Dihydroxy-acid dehydratase             | 4.2.1.9                       | DHVALm -> OIVALm                                 | GFAOP             |
| AO090102000231                    | Dihydroxy-acid dehydratase             | 4.2.1.9                       | DHVALm -> OIVALm                                 | GFAOP             |
| AO090009000414                    | Dihydroxy-acid dehydratase             | 4.2.1.9                       | DHVALm -> OIVALm                                 | GFAOP             |
| AO090012000890                    | Dihydroxy-acid dehydratase             | 4.2.1.9                       | DHVALm -> OIVALm                                 | GFAOP             |
| AO090023000127                    | Dihydroxy-acid dehydratase             | 4.2.1.9                       | DHVALm -> OIVALm                                 | GFAOP             |
| AO090010000053                    | Dihydroxy-acid dehydratase             | 4.2.1.9                       | DHMVAm -> OMVALm                                 | GFAOP             |
| AO090102000231                    | Dihydroxy-acid dehydratase             | 4.2.1.9                       | DHMVAm -> OMVALm                                 | GFAOP             |
| AO090009000414                    | Dihydroxy-acid dehydratase             | 4.2.1.9                       | DHMVAm -> OMVALm                                 | GFAOP             |
| AO090012000890                    | Dihydroxy-acid dehydratase             | 4.2.1.9                       | DHMVAm -> OMVALm                                 | GFAOP             |
| AO090023000127                    | Dihydroxy-acid dehydratase             | 4.2.1.9                       | DHMVAm -> OMVALm                                 | GFAOP             |
| AO090005001230                    | 2-isopropylmalate synthase             | 2.3.3.13                      | ACCOAm + OIVALm -> COAm + IPPMALm                | BLASTP            |
| AO090026000524                    | 3-isopropylmalate dehydratase          | 4.2.1.33                      | CBHCAP <-> IPPMAL                                | BLASTP            |
| AO090026000524                    | 3-isopropylmalate dehydratase          | 4.2.1.33                      | PPMAL <-> IPPMAL                                 | BLASTP            |
| AO090005001122                    | 3-isopropylmalate dehydrogenase        | 1.1.1.85                      | IPPMALm + NADm -> NADHm + OICAPm + CO2m          | BLASTP            |
| AO090103000328                    | 3-isopropylmalate dehydrogenase        | 1.1.1.85                      | IPPMALm + NADm -> NADHm + OICAPm + CO2m          | BLASTP            |
| AO090001000555                    | 2-oxoisovalerate dehydrogenase complex | 1.2.4.4/1.8.1.4/<br>2.3.1.168 | OIVAL + NAD + COA -> ISOBUCOA + CO2 +<br>NADH    | BLASTP            |
| AO090001000555                    | 2-oxoisovalerate dehydrogenase complex | 1.2.4.4/1.8.1.4/<br>2.3.1.168 | OMVAL + NAD + COA -> METBUCOA + CO2 +<br>NADH    | BLASTP            |
| AO090001000555                    | 2-oxoisovalerate dehydrogenase complex | 1.2.4.4/1.8.1.4/<br>2.3.1.168 | OICAP + NAD + COA -> ISOVACOA + CO2 +<br>NADH    | BLASTP            |
| AO090020000493                    | Isovaleryl-CoA dehydrogenase           | 1.3.99.10                     | ISOVACOAm + FADm -> MCRCOAm + FADH2m             | BLASTP            |
| AO090020000495/<br>AO090020000492 | Methylcrotonoyl-CoA carboxylase        | 6.4.1.4                       | ATPm + MCRCOAm + HCO3m -> ADPm + PIm +<br>MGCOAm | BLASTP            |

| Gene name                                                                                  | Enzyme name                                       | EC number | Biochemical reaction                             | Annotation method |
|--------------------------------------------------------------------------------------------|---------------------------------------------------|-----------|--------------------------------------------------|-------------------|
| AO090003000703                                                                             | Methylglutaconyl-CoA hydratase                    | 4.2.1.18  | H2Om + MGCOAm <-> H3MCOAm                        | BLASTP            |
| AO090026000392                                                                             | 3-hydroxymethyl-3-methylglutaryl-Coenzyme A lyase | 4.1.3.4   | H3MCOAm + COAm -> ACTACm + ACCOAm                | GFAOP             |
| AO090038000541                                                                             | 3-hydroxymethyl-3-methylglutaryl-Coenzyme A lyase | 4.1.3.4   | H3MCOAm + COAm -> ACTACm + ACCOAm                | GFAOP             |
| AO090005001248                                                                             | Acyl-CoA dehydrogenase                            | 1.3.99.2  | ISOBUCOAm + FADm -> MCRCOAm + FADH2m             | BLASTP            |
| AO090011000575                                                                             | Enoyl-CoA hydratase                               | 4.2.1.17  | MCRCOAm + H2Om -> HYISOCOAm                      | BLASTP            |
| AO090120000413                                                                             | 3-hydroxyisobutyryl-CoA hydrolase                 | 3.1.2.4   | HYISOCOAm + H2Om -> HYISORATEm + COAm            | BLASTP            |
| AO090023000518                                                                             | 3-hydroxyisobutyrate dehydrogenase                | 1.1.1.31  | HYISORATEm + NADm <-> MMSHYm + NADHm             | BLASTP            |
| AO090009000314                                                                             | Methylmalonate-semialdehyde dehydrogenase         | 1.2.1.27  | MMSHYm + COAm + NADm -> PROPCOAm + CO2m + NADHm  | BLASTP            |
| AO090005001248                                                                             | Acyl-CoA dehydrogenase                            | 1.3.99.2  | METBUCOA + FADm -> TGLCOA + FADH2m               | BLASTP            |
| AO090011000575                                                                             | Enoyl-CoA hydratase                               | 4.2.1.17  | TGLCOA + H2O -> METBYCOA                         | GFAOP             |
| AO090001000629/<br>AO090026000443/<br>AO090009000113/<br>AO090026000411/<br>AO090103000436 | 3-hydroxyacyl-CoA dehydrogenase                   | 1.1.1.35  | METBYCOA + NAD <-> MCECOA + NADH                 | BLASTP            |
| AO090005000090                                                                             | 3-ketoacyl-CoA thiolase                           | 2.3.1.16  | MCECOA + COA -> ACCOA + PROPCOA                  | BLASTP            |
| AO090003001121                                                                             | 3-ketoacyl-CoA thiolase                           | 2.3.1.16  | MCECOA + COA -> ACCOA + PROPCOA                  | BLASTP            |
| AO090026000515                                                                             | 3-ketoacyl-CoA thiolase                           | 2.3.1.16  | MCECOA + COA -> ACCOA + PROPCOA                  | BLASTP            |
| AO090012000715                                                                             | 3-ketoacyl-CoA thiolase                           | 2.3.1.16  | MCECOA + COA -> ACCOA + PROPCOA                  | BLASTP            |
| AO090012000505                                                                             | Isoleucyl-tRNA synthetase                         | 6.1.1.5   | ATP + ILE + TRNA -> AMP + PPI + LILEUTRNA        | BLASTP            |
| AO090010000218                                                                             | Isoleucyl-tRNA synthetase                         | 6.1.1.5   | ATPm + ILEm + TRNAm -> AMPm + PPIIm + LILEUTRNAm | BLASTP            |
| AO090005000667                                                                             | Valyl-tRNA synthetase                             | 6.1.1.9   | ATP + VAL + TRNA -> AMP + PPI + LValTRNA         | BLASTP            |
| AO090003000376                                                                             | Leucyl-tRNA synthetase                            | 6.1.1.4   | ATP + LEU + TRNA -> AMP + PPI + LLeuTRNA         | BLASTP            |
| AO090701000047                                                                             | Leucyl-tRNA synthetase                            | 6.1.1.4   | ATP + LEU + TRNA -> AMP + PPI + LLeuTRNA         | BLASTP            |

| Gene name                      | Enzyme name                                            | EC number | Biochemical reaction                          | Annotation method |
|--------------------------------|--------------------------------------------------------|-----------|-----------------------------------------------|-------------------|
| <b># Lysine metabolism</b>     |                                                        |           |                                               |                   |
| AO090003001165                 | Homocitrate synthase                                   | 2.3.3.14  | ACCOA + H2O + AKG -> HCIT + COA               | BLASTP            |
| AO090124000027                 | Homocitrate synthase                                   | 2.3.3.14  | ACCOA + H2O + AKG -> HCIT + COA               | BLASTP            |
| AO090701000175                 | Methylcitrate dehydratase                              | 4.2.1.79  | HCIT <-> HACN                                 | BLASTP            |
| AO090701000175                 | Methylcitrate dehydratase                              | 4.2.1.79  | HCITm <-> HACNm                               | BLASTP            |
| AO090010000161                 | Methylcitrate dehydratase                              | 4.2.1.79  | HCIT <-> HACN                                 | BLASTP            |
| AO090701000041                 | Homoaconitase                                          | 4.2.1.36  | HACNm <-> HICITm                              | BLASTP            |
| AO090003001097                 | Alpha-aminoadipate reductase                           | 1.2.1.31  | AMA + NADPH + ATP -> AMASA + NADP + AMP + PPI | BLASTP            |
| AO090003001086                 | Saccharopine dehydrogenase (NADP, L-glutamate-forming) | 1.5.1.10  | GLU + AMASA + NADPH <-> SACP + NADP           | BLASTP            |
| AO090005001561                 | Homoisocitrate dehydrogenase                           | 1.1.1.87  | HICIT + NAD <-> AKA + CO2 + NADH              | BLASTP            |
| AO090026000563                 | 2-aminoadipate transaminase                            | 2.6.1.39  | AKA + GLU <-> AMA + AKG                       | GFAOP             |
| AO090011000361                 | 2-aminoadipate transaminase                            | 2.6.1.39  | AKA + GLU <-> AMA + AKG                       | GFAOP             |
| AO090003000728                 | Saccharopine dehydrogenase (NAD+, L-lysine forming)    | 1.5.1.7   | SACP + NAD <-> LYS + AKG + NADH               | GFAOP             |
| AO090003000729                 | Saccharopine dehydrogenase (NAD+, L-lysine forming)    | 1.5.1.7   | SACP + NAD <-> LYS + AKG + NADH               | GFAOP             |
| AO090001000233                 | Saccharopine dehydrogenase (NAD+, L-lysine forming)    | 1.5.1.7   | SACP + NAD <-> LYS + AKG + NADH               | GFAOP             |
| AO090003001442                 | Dihydrodipicolinate synthase                           | 4.2.1.52  | ASPSA + PYR -> DIDIPC + 2 H2O                 | BLASTP            |
| AO090003000186                 | Lysyl-tRNA synthetase                                  | 6.1.1.6   | ATP + LYS + TRNA -> AMP + PPI + LLTRNA        | BLASTP            |
| AO090003000867                 | Lysyl-tRNA synthetase                                  | 6.1.1.6   | ATP + LYS + TRNA -> AMP + PPI + LLTRNA        | BLASTP            |
| <b># Methionine metabolism</b> |                                                        |           |                                               |                   |
| AO090020000019                 | Cystathionine gamma-synthase                           | 2.5.1.48  | PHSER + CYS -> LLCT + SUCC                    | BLASTP            |
| AO090003001113                 | Cystathionine gamma-synthase                           | 2.5.1.48  | PHSER + CYS -> LLCT + SUCC                    | BLASTP            |
| AO090038000528                 | Cystathionine beta-lyase                               | 4.4.1.8   | LLCT + H2O -> HCYS + PYR + NH3                | BLASTP            |
| AO090012000886                 | Cystathionine beta-lyase                               | 4.4.1.8   | LLCT + H2O -> HCYS + PYR + NH3                | BLASTP            |
| AO090023000150                 | Cystathionine beta-lyase                               | 4.4.1.8   | LLCT + H2O -> HCYS + PYR + NH3                | BLASTP            |
| AO090120000144                 | Cystathionine beta-lyase                               | 4.4.1.8   | LLCT + H2O -> HCYS + PYR + NH3                | BLASTP            |

| Gene name                                                                           | Enzyme name                                                                | EC number | Biochemical reaction                     | Annotation method |
|-------------------------------------------------------------------------------------|----------------------------------------------------------------------------|-----------|------------------------------------------|-------------------|
| AO090023000837                                                                      | 5-methyltetrahydropteroyltriglutamate—<br>homocysteine S-methyltransferase | 2.1.1.14  | HCYS + MTHPTGLU -> THPTGLU + MET         | BLASTP            |
| AO090003000768                                                                      | 5-methyltetrahydropteroyltriglutamate—<br>homocysteine S-methyltransferase | 2.1.1.14  | HCYS + MTHPTGLU -> THPTGLU + MET         | BLASTP            |
| AO090003000768                                                                      | Methionine synthase                                                        | 2.1.1.13  | HCYS + MTHF -> THF + MET                 | BLASTP            |
| AO090023000837                                                                      | Methionine synthase                                                        | 2.1.1.13  | HCYS + MTHF -> THF + MET                 | BLASTP            |
| AO090038000357                                                                      | S-adenosylmethionine synthetase                                            | 2.5.1.6   | MET + ATP -> PPI + PI + SAM              | BLASTP            |
| AO090701000299                                                                      | S-adenosylmethionine synthetase                                            | 2.5.1.6   | MET + ATP -> PPI + PI + SAM              | BLASTP            |
| AO090038000417                                                                      | Adenosylhomocysteinase                                                     | 3.3.1.1   | SAH -> HCYS + ADN                        | BLASTP            |
| AO090005001181                                                                      | Homoserine O-acetyltransferase                                             | 2.3.1.31  | ACCOA + HSER <-> COA + OAHSER            | BLASTP            |
| AO090120000210                                                                      | Homoserine O-acetyltransferase                                             | 2.3.1.31  | ACCOA + HSER <-> COA + OAHSER            | BLASTP            |
| AO090701000235                                                                      | Homoserine O-acetyltransferase                                             | 2.3.1.31  | ACCOA + HSER <-> COA + OAHSER            | BLASTP            |
| AO090005000626                                                                      | Cysteine synthase                                                          | 2.5.1.47  | ASERm + H2Sm -> ACm + CYSm               | BLASTP            |
| AO090102000276                                                                      | Cysteine synthase                                                          | 2.5.1.47  | ASERm + H2Sm -> ACm + CYSm               | BLASTP            |
| AO090011000336                                                                      | Cysteine synthase                                                          | 2.5.1.47  | ASER + H2S -> AC + CYS                   | BLASTP            |
| AO090102000630                                                                      | O-acetylhomoserine (thiol)-lyase                                           | 2.5.1.49  | OAHSER + H2S -> HCYS + AC                | BLASTP            |
| AO090020000019                                                                      | Cystathionine gamma-synthase                                               | 2.5.1.48  | CYS + OSLHSER -> SUCC + LLCT             | BLASTP            |
| AO090003001113                                                                      | Cystathionine gamma-synthase                                               | 2.5.1.48  | CYS + OSLHSER -> SUCC + LLCT             | BLASTP            |
| AO090012000475                                                                      | Diphthine synthase                                                         | 2.1.1.98  | SAM + CALH -> SAH + DPTH                 | BLASTP            |
| AO090103000051                                                                      | Cystathionine gamma-lyase                                                  | 4.4.1.1   | LLCT -> CYS + NH3 + OBUT                 | BLASTP            |
| AO090011000323                                                                      | Cystathionine gamma-lyase                                                  | 4.4.1.1   | LLCT -> CYS + NH3 + OBUT                 | BLASTP            |
| AO090010000103                                                                      | Homocysteine S-methyltransferase                                           | 2.1.1.10  | SAM + HCYS -> SAH + MET                  | GFAOP             |
| AO090001000546                                                                      | S-methyl-5'-thioadenosine phosphorylase                                    | 2.4.2.28  | 5MTA + PI -> 5THR1P + AD                 | BLASTP            |
| AO090023000789                                                                      | Methionyl-tRNA synthetase                                                  | 6.1.1.10  | ATP + MET + TRNA -> AMP + PPI + LMETTRNA | BLASTP            |
| <b># Phenylalanine, tyrosine and tryptophan biosynthesis (Aromatic amino acids)</b> |                                                                            |           |                                          |                   |
| AO090005000886                                                                      | Phospho-2-dehydro-3-deoxyheptonate aldolase                                | 2.5.1.54  | E4P + PEP -> PI + 3DDAH7P                | BLASTP            |
| AO090005000086                                                                      | Phospho-2-dehydro-3-deoxyheptonate aldolase                                | 2.5.1.54  | E4P + PEP -> PI + 3DDAH7P                | BLASTP            |
| AO090001000214                                                                      | Phospho-2-dehydro-3-deoxyheptonate aldolase                                | 2.5.1.54  | E4P + PEP -> PI + 3DDAH7P                | BLASTP            |
| AO090023000682                                                                      | Phospho-2-dehydro-3-deoxyheptonate aldolase                                | 2.5.1.54  | E4P + PEP -> PI + 3DDAH7P                | BLASTP            |



| Gene name                                            | Enzyme name                                  | EC number  | Biochemical reaction                 | Annotation method |
|------------------------------------------------------|----------------------------------------------|------------|--------------------------------------|-------------------|
| AO090012000502                                       | 3-dehydroquinate synthase                    | 4.2.3.4    | 3DDAH7P -> DQT + PI                  | BLASTP            |
| AO090038000261                                       | 3-dehydroquinate dehydratase                 | 4.2.1.10   | DQT -> DHSK                          | BLASTP            |
| AO090012000502                                       | 3-dehydroquinate dehydratase                 | 4.2.1.10   | DQT -> DHSK                          | BLASTP            |
| AO090012000502                                       | Shikimate dehydrogenase                      | 1.1.1.25   | DHSK + NADPH -> SME + NADP           | BLASTP            |
| AO090038000263                                       | Quinate dehydrogenase                        | 1.1.1.24   | QT + NAD <-> DQT + NADH              | BLASTP            |
| AO090012000502                                       | Shikimate kinase                             | 2.7.1.71   | SME + ATP -> ADP + SME3P             | BLASTP            |
| AO090012000502                                       | 3-phosphoshikimate 1-carboxyvinyltransferase | 2.5.1.19   | SME3P + PEP -> 3PSME + PI            | BLASTP            |
| AO090003000081                                       | Chorismate synthase                          | 4.2.3.5    | 3PSME -> PI + CHOR                   | BLASTP            |
| AO090003000371/<br>AO090012000581/<br>AO090026000117 | Anthranilate synthase                        | 4.1.3.27   | CHOR + GLN -> GLU + PYR + AN         | GFAOP             |
| AO090003001011                                       | Anthranilate phosphoribosyltransferase       | 2.4.2.18   | AN + PRPP -> PPI + NPRAN             | BLASTP            |
| AO090012000581                                       | Phosphoribosylanthranilate isomerase         | 5.3.1.24   | NPRAN -> CPAD5P                      | GFAOP             |
| AO090012000581                                       | Indoleglycerol phosphate synthase            | 4.1.1.48   | CPAD5P -> CO2 + IGP                  | GFAOP             |
| AO090005001315/<br>AO090023000874/<br>AO090026000284 | Tryptophan synthetase                        | 4.2.1.20   | IGP + SER -> T3P1 + TRP              | BLASTP            |
| AO090020000618                                       | Tryptophan 2,3-dioxygenase                   | 1.13.11.11 | TRP + O2 -> FKYN                     | BLASTP            |
| AO090003001248                                       | Tryptophan 2,3-dioxygenase                   | 1.13.11.11 | TRP + O2 -> FKYN                     | BLASTP            |
| AO090038000057                                       | Aromatic-L-amino-acid decarboxylase          | 4.1.1.28   | TRP -> TRPM + CO2                    | GFAOP             |
| AO090038000010                                       | Aromatic-L-amino-acid decarboxylase          | 4.1.1.28   | TRP -> TRPM + CO2                    | GFAOP             |
| ZY093903                                             | Aromatic-L-amino-acid decarboxylase          | 4.1.1.28   | TRP -> TRPM + CO2                    | EST               |
| ZY087560                                             | Aromatic-L-amino-acid decarboxylase          | 4.1.1.28   | TRP -> TRPM + CO2                    | EST               |
| AO090011000472                                       | Formamidase                                  | 3.5.1.9    | FKYN -> FOR + KYN                    | BLASTP            |
| AO090011000602                                       | Kynureninase                                 | 3.7.1.3    | KYN -> ALA + AN                      | BLASTP            |
| AO090003001247                                       | Kynureninase                                 | 3.7.1.3    | KYN -> ALA + AN                      | BLASTP            |
| AO090005001567                                       | Kynurenine 3-monooxygenase                   | 1.14.13.9  | KYNm + NADPHm + O2m -> HKYNm + NADPm | BLASTP            |
| AO090003001247                                       | Kynureninase                                 | 3.7.1.3    | HKYN -> HAN + ALA                    | BLASTP            |
| AO090011000602                                       | Kynureninase                                 | 3.7.1.3    | HKYN -> HAN + ALA                    | BLASTP            |
| AO090023000314                                       | 3-Hydroxyanthranilate 3,4-dioxygenase        | 1.13.11.6  | HAN + O2 -> CMUSA                    | BLASTP            |

| Gene name      | Enzyme name                                            | EC number  | Biochemical reaction              | Annotation method |
|----------------|--------------------------------------------------------|------------|-----------------------------------|-------------------|
| AO090120000370 | 2-amino-3-carboxymuconate-6-semialdehyde decarboxylase | 4.1.1.45   | CMUSA -> CO2 + AM6SA              | BLASTP            |
| AO090005000682 | 2-amino-3-carboxymuconate-6-semialdehyde decarboxylase | 4.1.1.45   | CMUSA -> CO2 + AM6SA              | BLASTP            |
| AO090102000067 | 2-amino-3-carboxymuconate-6-semialdehyde decarboxylase | 4.1.1.45   | CMUSA -> CO2 + AM6SA              | BLASTP            |
| GAP            | 2-Aminomuconate-reductase                              | 1.5.1.-    | AMUCO + NADPH -> AKA + NADP + NH3 | NONE              |
| AO090120000438 | Chorismate mutase                                      | 5.4.99.5   | CHOR -> PHEN                      | BLASTP            |
| AO090011000595 | Prephenate dehydrogenase                               | 1.3.1.12   | PHEN + NAD -> 4HPP + CO2 + NADH   | BLASTP            |
| AO090011000595 | Prephenate dehydrogenase                               | 1.3.1.13   | PHEN + NADP -> 4HPP + CO2 + NADPH | BLASTP            |
| AO090009000693 | Prephenate dehydratase                                 | 4.2.1.51   | PHEN -> CO2 + PHPYR               | BLASTP            |
| AO090026000245 | Aromatic-amino-acid transaminase                       | 2.6.1.57   | PHPYR + GLU <-> AKG + PHE         | BLASTP            |
| AO090020000444 | Aromatic-amino-acid transaminase                       | 2.6.1.57   | PHPYR + GLU <-> AKG + PHE         | BLASTP            |
| AO090102000498 | Aromatic-amino-acid transaminase                       | 2.6.1.57   | PHPYR + GLU <-> AKG + PHE         | BLASTP            |
| AO090120000135 | Aspartate transaminase                                 | 2.6.1.1    | 4HPP + GLU <-> AKG + TYR          | BLASTP            |
| GAP            | Aminomuconate-semialdehyde dehydrogenase               | 1.2.1.32   | AM6SA + NAD -> AMUCO + NADH       | NONE              |
| AO090003000208 | 4-hydroxyphenylpyruvate dioxygenase                    | 1.13.11.27 | 4HPP + O2 -> HOMOGEN + CO2        | BLASTP            |
| AO090038000266 | 4-hydroxyphenylpyruvate dioxygenase                    | 1.13.11.27 | 4HPP + O2 -> HOMOGEN + CO2        | BLASTP            |
| AO090103000429 | 4-hydroxyphenylpyruvate dioxygenase                    | 1.13.11.27 | 4HPP + O2 -> HOMOGEN + CO2        | BLASTP            |
| AO090001000548 | 4-hydroxyphenylpyruvate dioxygenase                    | 1.13.11.27 | 4HPP + O2 -> HOMOGEN + CO2        | BLASTP            |
| AO090103000492 | 4-hydroxyphenylpyruvate dioxygenase                    | 1.13.11.27 | 4HPP + O2 -> HOMOGEN + CO2        | BLASTP            |
| AO090003000210 | Homogentisate 1,2-dioxygenase                          | 1.13.11.5  | HOMOGEN + O2 -> MACAC             | BLASTP            |
| AO090012000156 | Homogentisate 1,2-dioxygenase                          | 1.13.11.5  | HOMOGEN + O2 -> MACAC             | BLASTP            |
| AO090003000212 | Maleylacetoacetate isomerase                           | 5.2.1.2    | MACAC -> FUACAC                   | BLASTP            |
| AO090003000211 | Fumarylacetoacetate hydrolase                          | 3.7.1.2    | FUACAC -> FUM + ACTAC             | BLASTP            |
| AO090701000601 | Phenylalanine ammonia-lyase                            | 4.3.1.5    | PHE -> CINNAM + NH3               | GFAOP             |
| AO090011000788 | Phenylalanine ammonia-lyase                            | 4.3.1.5    | PHE -> CINNAM + NH3               | GFAOP             |
| AO090026000586 | Phenylalanine ammonia-lyase                            | 4.3.1.5    | PHE -> CINNAM + NH3               | GFAOP             |
| AO090005000532 | Phenylalanine ammonia-lyase                            | 4.3.1.5    | PHE -> CINNAM + NH3               | GFAOP             |
| AO090010000722 | Peroxidase                                             | 1.11.1.7   | PHEm + H2O2m -> PADm + 2 H2Om     | BLASTP            |

| Gene name      | Enzyme name                  | EC number | Biochemical reaction                         | Annotation method |
|----------------|------------------------------|-----------|----------------------------------------------|-------------------|
| AO090038000171 | Acetamidase                  | 3.5.1.4   | PAD -> PAC + NH3                             | BLASTP            |
| AO090003000129 | Acetamidase                  | 3.5.1.4   | PAD -> PAC + NH3                             | BLASTP            |
| AO090701000035 | Acetamidase                  | 3.5.1.4   | PAD -> PAC + NH3                             | BLASTP            |
| AO090038000537 | Acetamidase                  | 3.5.1.4   | PAD -> PAC + NH3                             | BLASTP            |
| AO090038000171 | Acetamidase                  | 3.5.1.4   | IAD -> IAC + NH3                             | BLASTP            |
| AO090003000129 | Acetamidase                  | 3.5.1.4   | IAD -> IAC + NH3                             | BLASTP            |
| AO090701000035 | Acetamidase                  | 3.5.1.4   | IAD -> IAC + NH3                             | BLASTP            |
| AO090038000537 | Acetamidase                  | 3.5.1.4   | IAD -> IAC + NH3                             | BLASTP            |
| AO090012000770 | Diamine transaminase         | 2.6.1.29  | SPRMD + ACCOA -> ASPERMD + COA               | BLASTP            |
| AO090009000545 | Polyamine oxidase            | 1.5.3.11  | ASPERMD + O2 -> APRUT + APROA + H2O2         | BLASTP            |
| AO090010000340 | Polyamine oxidase            | 1.5.3.11  | ASPERMD + O2 -> APRUT + APROA + H2O2         | BLASTP            |
| AO090009000545 | Polyamine oxidase            | 1.5.3.11  | APRUT + O2 -> GABAL + APROA + H2O2           | BLASTP            |
| AO090010000340 | Polyamine oxidase            | 1.5.3.11  | APRUT + O2 -> GABAL + APROA + H2O2           | BLASTP            |
| AO090003001103 | Kynurenine aminotransferase  | 2.6.1.7   | KYN + AKG -> APEBU + GLU                     | BLASTP            |
| AO090026000525 | Aryl-alcohol dehydrogenase   | 1.1.1.90  | PHACAL + NADH <-> PHEETHAL + NAD             | BLASTP            |
| AO090113000193 | Aryl-alcohol dehydrogenase   | 1.1.1.90  | PHACALm + NADHm <-> PHEETHALm + NADm         | BLASTP            |
| AO090138000198 | Aryl-alcohol dehydrogenase   | 1.1.1.90  | PHACALm + NADHm <-> PHEETHALm + NADm         | BLASTP            |
| AO090011000472 | Formamidase                  | 3.5.1.49  | FORMIE + H2O -> FOR + NH3                    | BLASTP            |
| AO090003000380 | Catalase                     | 1.11.1.6  | 2 H2O2p -> 2 H2Op + O2p                      | GFAOP             |
| AO090011000540 | Catalase                     | 1.11.1.6  | 2 H2O2p -> 2 H2Op + O2p                      | GFAOP             |
| AO090020000389 | Catalase                     | 1.11.1.6  | 2 H2O2p -> 2 H2Op + O2p                      | GFAOP             |
| AO090113000153 | Catalase                     | 1.11.1.6  | 2 H2O2p -> 2 H2Op + O2p                      | GFAOP             |
| AO090113000153 | Catalase                     | 1.11.1.6  | 2 H2O2m -> 2 H2Om + O2m                      | BLASTP            |
| AO090010000722 | Catalase                     | 1.11.1.6  | 2 H2O2m -> 2 H2Om + O2m                      | BLASTP            |
| AO090120000068 | Catalase                     | 1.11.1.6  | 2 H2O2 -> 2 H2O + O2                         | BLASTP            |
| AO090701000158 | Catalase                     | 1.11.1.6  | 2 H2O2 -> 2 H2O + O2                         | BLASTP            |
| AO090120000068 | Catalase                     | 1.11.1.6  | 2 H2O2e -> 2 H2Oe + O2e                      | BLASTP            |
| AO090701000158 | Catalase                     | 1.11.1.6  | 2 H2O2e -> 2 H2Oe + O2e                      | BLASTP            |
| AO090003001055 | 2-oxoglutarate dehydrogenase | 1.2.4.2   | AKA -> GLTCOA + CO2                          | BLASTP            |
| AO090020000074 | Glutaryl-CoA dehydrogenase   | 1.3.99.7  | GLTCOAm + FADm -> CRONYLCOAm + CO2m + FADH2m | BLASTP            |

| Gene name                                            | Enzyme name                            | EC number | Biochemical reaction                                                            | Annotation method |
|------------------------------------------------------|----------------------------------------|-----------|---------------------------------------------------------------------------------|-------------------|
| AO09012400024                                        | Tyrosyl-tRNA synthetase                | 6.1.1.1   | ATP + TYR + TRNA -> AMP + PPI+ LTyrTRNA                                         | BLASTP            |
| AO090023000727                                       | Tyrosyl-tRNA synthetase                | 6.1.1.1   | ATPm + TYRm + TRNAm -> AMPm + PPIIm+ LTyrTRNA <sub>m</sub>                      | BLASTP            |
| AO090012000399                                       | Tryptophan-tRNA synthetase             | 6.1.1.2   | ATP + TRP + TRNA -> AMP + PPI + TRPTRNA                                         | BLASTP            |
| AO090009000378/<br>AO090026000265/<br>AO090120000226 | Phenylalanyl-tRNA synthetase           | 6.1.1.20  | ATP + PHE + TRNA -> AMP + PPI + LPheTRNA                                        | BLASTP            |
| <b># Beta-alanine metabolism</b>                     |                                        |           |                                                                                 |                   |
| AO090001000162                                       | NAD-dependent aldehyde dehydrogenase   | 1.2.1.3   | GABAL + NAD -> GABA + NADH                                                      | BLASTP            |
| AO090023000467                                       | NAD-dependent aldehyde dehydrogenase   | 1.2.1.3   | GABAL + NAD -> GABA + NADH                                                      | BLASTP            |
| AO090009000417                                       | NAD-dependent aldehyde dehydrogenase   | 1.2.1.3   | GABAL <sub>m</sub> + NAD <sub>m</sub> -> GABA <sub>m</sub> + NADH <sub>m</sub>  | BLASTP            |
| AO090009000417                                       | NAD-dependent aldehyde dehydrogenase   | 1.2.1.3   | GABAL + NAD -> GABA + NADH                                                      | BLASTP            |
| ZY087055                                             | NAD-dependent aldehyde dehydrogenase   | 1.2.1.3   | GABAL + NAD -> GABA + NADH                                                      | EST               |
| AO090001000162                                       | NAD-dependent aldehyde dehydrogenase   | 1.2.1.3   | LACAL + NAD <-> LLAC + NADH                                                     | BLASTP            |
| AO090023000467                                       | NAD-dependent aldehyde dehydrogenase   | 1.2.1.3   | LACAL + NAD <-> LLAC + NADH                                                     | BLASTP            |
| AO090009000417                                       | NAD-dependent aldehyde dehydrogenase   | 1.2.1.3   | LACAL <sub>m</sub> + NAD <sub>m</sub> <-> LLAC <sub>m</sub> + NADH <sub>m</sub> | BLASTP            |
| AO090009000417                                       | NAD-dependent aldehyde dehydrogenase   | 1.2.1.3   | LACAL + NAD <-> LLAC + NADH                                                     | BLASTP            |
| ZY087055                                             | NAD-dependent aldehyde dehydrogenase   | 1.2.1.3   | LACAL + NAD <-> LLAC + NADH                                                     | EST               |
| GAP                                                  | Dihydropyrimidine dehydrogenase (NADP) | 1.3.1.2   | URA + NADPH -> DIHURA + NADP                                                    | NONE              |
| AO090009000580                                       | Dihydropyrimidinase                    | 3.5.2.2   | DIHURA + H2O -> UREIPRO                                                         | GFAOP             |
| AO090026000066                                       | Dihydropyrimidinase                    | 3.5.2.2   | DIHURA + H2O -> UREIPRO                                                         | GFAOP             |
| AO090003000384                                       | Beta-alanine synthase                  | 3.5.1.6   | UREIPRO -> bALA + NH3 + CO2                                                     | GFAOP             |
| <b># Cyanoamino acid metabolism</b>                  |                                        |           |                                                                                 |                   |
| AO090020000571                                       | Nitrilase                              | 3.5.5.1   | ACYBUT -> GLU + NH3                                                             | BLASTP            |
| AO090003000470                                       | Nitrilase                              | 3.5.5.1   | ACYBUT -> GLU + NH3                                                             | BLASTP            |
| AO090020000385                                       | Nitrilase                              | 3.5.5.1   | ACYBUT -> GLU + NH3                                                             | BLASTP            |
| AO090020000571                                       | Nitrilase                              | 3.5.5.1   | APROP -> ALA + NH3                                                              | BLASTP            |
| AO090003000470                                       | Nitrilase                              | 3.5.5.1   | APROP -> ALA + NH3                                                              | BLASTP            |
| AO090020000385                                       | Nitrilase                              | 3.5.5.1   | APROP -> ALA + NH3                                                              | BLASTP            |

| Gene name                                   | Enzyme name                                       | EC number  | Biochemical reaction                         | Annotation method |
|---------------------------------------------|---------------------------------------------------|------------|----------------------------------------------|-------------------|
| <b># Taurine and hypotaurine metabolism</b> |                                                   |            |                                              |                   |
| No_Gene                                     | Spontaneous conversion                            | No_EC      | 3SULALA -> CYSE                              | BLASTP            |
| AO090103000342                              | Glutamate decarboxylase                           | 4.1.1.15   | CYSE -> TARE + CO2                           | BLASTP            |
| AO090005000539                              | Glutamate decarboxylase                           | 4.1.1.15   | CYSE -> TARE + CO2                           | BLASTP            |
| AO090003000666                              | Glutamate decarboxylase                           | 4.1.1.15   | CYSE -> TARE + CO2                           | BLASTP            |
| AO090005000704                              | Glutamate decarboxylase                           | 4.1.1.15   | CYSE -> TARE + CO2                           | BLASTP            |
| AO090009000076                              | Alpha-ketoglutarate-dependent taurine dioxygenase | 1.14.11.17 | TARE + AKG + O2 -> H2S + AMIACE + SUCC + CO2 | BLASTP            |
| AO090003000525                              | Alpha-ketoglutarate-dependent taurine dioxygenase | 1.14.11.17 | TARE + AKG + O2 -> H2S + AMIACE + SUCC + CO2 | BLASTP            |
| AO090023000531                              | Alpha-ketoglutarate-dependent taurine dioxygenase | 1.14.11.17 | TARE + AKG + O2 -> H2S + AMIACE + SUCC + CO2 | BLASTP            |
| AO090005001496                              | Alpha-ketoglutarate-dependent taurine dioxygenase | 1.14.11.17 | TARE + AKG + O2 -> H2S + AMIACE + SUCC + CO2 | BLASTP            |
| <b># Glutathione biosynthesis</b>           |                                                   |            |                                              |                   |
| AO090012000764                              | Gamma-Glutamylcysteine synthetase                 | 6.3.2.2    | CYS + GLU + ATP -> GC + PI + ADP             | BLASTP            |
| AO090701000193                              | Glutathione synthetase                            | 6.3.2.3    | GLY + GC + ATP -> RGT + PI + ADP             | GFAOP             |
| AO090138000051                              | Glutathione synthetase                            | 6.3.2.3    | GLY + GC + ATP -> RGT + PI + ADP             | GFAOP             |
| AO090005000169                              | Gamma-glutamyltranspeptidase                      | 2.3.2.2    | RGT + ALA -> CGLY + ALAGLY                   | BLASTP            |
| AO090009000211                              | Gamma-glutamyltranspeptidase                      | 2.3.2.2    | RGT + ALA -> CGLY + ALAGLY                   | BLASTP            |
| AO090023000537                              | Gamma-glutamyltranspeptidase                      | 2.3.2.2    | RGT + ALA -> CGLY + ALAGLY                   | BLASTP            |
| AO090113000029                              | Gamma-glutamyltranspeptidase                      | 2.3.2.2    | RGT + ALA -> CGLY + ALAGLY                   | BLASTP            |
| GAP                                         | Gamma-glutamylcyclotransferase                    | 2.3.2.4    | ALAGLY -> 5OXOPRO + ALA                      | NONE              |
| GAP                                         | Cysteinylglycinase aminopeptidase                 | 3.4.11.2   | CGLY + H2O -> GLY + CYS                      | NONE              |
| AO090103000443                              | 5-oxo-L-prolinase                                 | 3.5.2.9    | ATP + 5OXOPRO + 2 H2O -> ADP + PI + GLU      | BLASTP            |
| AO090103000420                              | 5-oxo-L-prolinase                                 | 3.5.2.9    | ATP + 5OXOPRO + 2 H2O -> ADP + PI + GLU      | BLASTP            |
| AO090005000015                              | 5-oxo-L-prolinase                                 | 3.5.2.9    | ATP + 5OXOPRO + 2 H2O -> ADP + PI + GLU      | BLASTP            |
| AO090005000956                              | 5-oxo-L-prolinase                                 | 3.5.2.9    | ATP + 5OXOPRO + 2 H2O -> ADP + PI + GLU      | BLASTP            |
| AO090005000739                              | Glutathione peroxidase                            | 1.11.1.9   | 2 RGT + H2O2 -> OGT + 2 H2O                  | BLASTP            |
| AO090005001092                              | Glutathione reductase                             | 1.6.4.2    | NADPH + OGT -> NADP + RGT                    | BLASTP            |
| AO090003000631                              | Glutathione S-transferase                         | 2.5.1.18   | RX + RGT -> HX + OGT                         | BLASTP            |
| AO090005000973                              | Glutathione S-transferase                         | 2.5.1.18   | RX + RGT -> HX + OGT                         | BLASTP            |
| AO090103000149                              | Glutathione S-transferase                         | 2.5.1.18   | RX + RGT -> HX + OGT                         | BLASTP            |
| AO090103000485                              | Glutathione S-transferase                         | 2.5.1.18   | RX + RGT -> HX + OGT                         | BLASTP            |

| Gene name      | Enzyme name                     | EC number | Biochemical reaction        | Annotation method |
|----------------|---------------------------------|-----------|-----------------------------|-------------------|
| AO090102000005 | Glutathione S-transferase       | 2.5.1.18  | RX + RGT -> HX + OGT        | BLASTP            |
| AO090003001039 | Glutathione S-transferase       | 2.5.1.18  | RX + RGT -> HX + OGT        | BLASTP            |
| AO090103000134 | Glutathione S-transferase       | 2.5.1.18  | RX + RGT -> HX + OGT        | BLASTP            |
| AO090102000478 | Glutathione S-transferase       | 2.5.1.18  | RX + RGT -> HX + OGT        | BLASTP            |
| AO090012000378 | Glutathione S-transferase       | 2.5.1.18  | RX + RGT -> HX + OGT        | BLASTP            |
| AO090012000112 | Glutathione S-transferase       | 2.5.1.18  | RX + RGT -> HX + OGT        | BLASTP            |
| AO090023000353 | Glutathione S-transferase       | 2.5.1.18  | RX + RGT -> HX + OGT        | BLASTP            |
| ZY087096       | Glutathione S-transferase       | 2.5.1.18  | RX + RGT -> HX + OGT        | EST               |
| AO090005001092 | Glutathione-disulfide reductase | 1.8.1.7   | NADPH + OGT -> NADP + 2 RGT | BLASTP            |

#### # 4. Nucleotide metabolism

##### # Purine Metabolism

|                |                                                           |          |                                           |        |
|----------------|-----------------------------------------------------------|----------|-------------------------------------------|--------|
| AO090003001133 | Ribose-phosphate pyrophosphokinase                        | 2.7.6.1  | R5P + ATP <-> PRPP + AMP                  | BLASTP |
| AO090005000432 | Ribose-phosphate pyrophosphokinase                        | 2.7.6.1  | R5P + ATP <-> PRPP + AMP                  | BLASTP |
| AO090012000798 | Ribose-phosphate pyrophosphokinase                        | 2.7.6.1  | R5P + ATP <-> PRPP + AMP                  | BLASTP |
| AO090001000512 | Adenylate cyclase                                         | 4.6.1.1  | ATP -> cAMP + PPI                         | BLASTP |
| AO090009000333 | Phosphoribosyl-aminoimidazole carboxylase                 | 4.1.1.21 | CAIR <-> AIR + CO2                        | BLASTP |
| AO090020000395 | Phosphoribosylaminoimidazole-succinocarboxamide synthase  | 6.3.2.6  | CAIR + ATP + ASP <-> ADP + PI + SAICAR    | BLASTP |
| AO090026000450 | Adenylosuccinate lyase                                    | 4.3.2.2  | SAICAR <-> FUM + AICAR                    | BLASTP |
| AO090103000467 | Adenylosuccinate lyase                                    | 4.3.2.2  | SAICAR <-> FUM + AICAR                    | BLASTP |
| AO090701000066 | Phosphoribosylformylglycinamidine cyclo-ligase            | 6.3.3.1  | FGAM + ATP -> ADP + PI + AIR              | BLASTP |
| AO090102000389 | Phosphoribosylformylglycinamidine synthase                | 6.3.5.3  | FGAR + ATP + GLN -> GLU + ADP + PI + FGAM | BLASTP |
| AO090011000545 | 5-phosphoribosylglycinamide formyltransferase             | 2.1.2.2  | GAR + FTHF -> THF + FGAR                  | GFAOP  |
| AO090701000066 | Phosphoribosylamine--glycine ligase                       | 6.3.4.13 | PRAM + ATP + GLY <-> ADP + PI + GAR       | BLASTP |
| AO090701000173 | Amidophosphoribosyltransferase                            | 2.4.2.14 | PRPP + GLN -> PPI + GLU + PRAM            | BLASTP |
| AO090023000806 | Phosphoribosylaminoimidazolecarboxamide formyltransferase | 2.1.2.3  | AICAR + FTHF <-> THF + PRFICA             | BLASTP |
| AO090023000806 | IMP cyclohydrolase                                        | 3.5.4.10 | PRFICA <-> IMP                            | BLASTP |

| Gene name      | Enzyme name                              | EC number | Biochemical reaction                     | Annotation method |
|----------------|------------------------------------------|-----------|------------------------------------------|-------------------|
| AO090005001150 | Adenylosuccinate synthetase              | 6.3.4.4   | IMP + GTP + ASP -> GDP + PI + ASUC       | BLASTP            |
| AO090023000395 | Argininosuccinate synthase               | 6.3.4.4   | IMP + GTP + ASP -> GDP + PI + ASUC       | BLASTP            |
| AO090026000450 | Adenylosuccinate lyase                   | 4.3.2.2   | ASUC <-> FUM + AMP                       | BLASTP            |
| AO090103000467 | Adenylosuccinate lyase                   | 4.3.2.2   | ASUC <-> FUM + AMP                       | BLASTP            |
| AO090026000141 | GMP synthase                             | 6.3.5.2   | XMP + ATP + GLN -> GLU + AMP + PPI + GMP | BLASTP            |
| AO090011000307 | GMP synthase                             | 6.3.5.2   | XMP + ATP + GLN -> GLU + AMP + PPI + GMP | BLASTP            |
| AO090005001643 | Guanylate kinase                         | 2.7.4.8   | GMP + ATP <-> GDP + ADP                  | BLASTP            |
| AO090005001643 | Guanylate kinase                         | 2.7.4.8   | DGMP + ATP <-> DGDP + ADP                | BLASTP            |
| AO090005001643 | Guanylate kinase                         | 2.7.4.8   | GMP + DATP <-> GDP + DADP                | BLASTP            |
| AO090010000778 | Adenosine monophosphate deaminase        | 3.5.4.6   | AMP + H2O -> IMP + NH3                   | BLASTP            |
| AO090003000819 | 3'5'-cyclic nucleotide phosphodiesterase | 3.1.4.17  | cAMP -> AMP                              | BLASTP            |
| AO090003000820 | 3'5'-cyclic nucleotide phosphodiesterase | 3.1.4.17  | cAMP -> AMP                              | BLASTP            |
| AO090005001243 | 3'5'-cyclic nucleotide phosphodiesterase | 3.1.4.17  | cAMP -> AMP                              | BLASTP            |
| AO090003000819 | 3'5'-cyclic nucleotide phosphodiesterase | 3.1.4.17  | cdAMP -> DAMP                            | BLASTP            |
| AO090003000820 | 3'5'-cyclic nucleotide phosphodiesterase | 3.1.4.17  | cdAMP -> DAMP                            | BLASTP            |
| AO090005001243 | 3'5'-cyclic nucleotide phosphodiesterase | 3.1.4.17  | cdAMP -> DAMP                            | BLASTP            |
| AO090003000819 | 3'5'-cyclic nucleotide phosphodiesterase | 3.1.4.17  | cIMP -> IMP                              | BLASTP            |
| AO090003000820 | 3'5'-cyclic nucleotide phosphodiesterase | 3.1.4.17  | cIMP -> IMP                              | BLASTP            |
| AO090005001243 | 3'5'-cyclic nucleotide phosphodiesterase | 3.1.4.17  | cIMP -> IMP                              | BLASTP            |
| AO090003000819 | 3'5'-cyclic nucleotide phosphodiesterase | 3.1.4.17  | cGMP -> GMP                              | BLASTP            |
| AO090003000820 | 3'5'-cyclic nucleotide phosphodiesterase | 3.1.4.17  | cGMP -> GMP                              | BLASTP            |
| AO090005001243 | 3'5'-cyclic nucleotide phosphodiesterase | 3.1.4.17  | cGMP -> GMP                              | BLASTP            |
| AO090003000819 | 3'5'-cyclic nucleotide phosphodiesterase | 3.1.4.17  | cCMP -> CMP                              | BLASTP            |
| AO090003000820 | 3'5'-cyclic nucleotide phosphodiesterase | 3.1.4.17  | cCMP -> CMP                              | BLASTP            |
| AO090005001243 | 3'5'-cyclic nucleotide phosphodiesterase | 3.1.4.17  | cCMP -> CMP                              | BLASTP            |
| AO090701000748 | ADP-ribose diphosphatase                 | 3.6.1.13  | ADPRIB + H2O -> AMP + R5P                | BLASTP            |
| AO090138000061 | ADP-ribose diphosphatase                 | 3.6.1.13  | ADPRIB + H2O -> AMP + R5P                | BLASTP            |
| AO090010000228 | Inosine triphosphate pyrophosphatase     | 3.6.1.19  | ITP + H2O -> IMP + PPI                   | BLASTP            |
| AO090010000228 | Inosine triphosphate pyrophosphatase     | 3.6.1.19  | GTP + H2O -> GMP + PPI                   | GFAOP             |
| AO090010000228 | Inosine triphosphate pyrophosphatase     | 3.6.1.19  | DGTP + H2O -> DGMP + PPI                 | BLASTP            |



| Gene name                         | Enzyme name                                        | EC number | Biochemical reaction                   | Annotation method |
|-----------------------------------|----------------------------------------------------|-----------|----------------------------------------|-------------------|
| AO090011000350                    | Guanine deaminase                                  | 3.5.4.3   | GN + H2O -> XAN + NH3                  | BLASTP            |
| AO090023000256                    | Guanine deaminase                                  | 3.5.4.3   | GN + H2O -> XAN + NH3                  | BLASTP            |
| GAP                               | GTP diphosphokinase                                | 2.7.6.5   | ATP+ GTP -> AMP + pppGpp               | NONE              |
| AO090102000550                    | Exopolyphosphatase                                 | 3.6.1.11  | pppGpp + H2O <-> ppGpp + PI            | BLASTP            |
| GAP                               | Guanosine-3',5'-bis(diphosphate) 3'-diphosphatase  | 3.1.7.2   | ppGpp + H2O <-> GDP + PPI              | NONE              |
| AO090003001099                    | Xanthine dehydrogenase                             | 1.17.1.4  | XANp + NADp + H2Op -> URATEp + NADHp   | BLASTP            |
| AO090003001099                    | Xanthine oxidase                                   | 1.17.3.2  | XANp + H2Op + O2p -> URATEp + H2O2p    | BLASTP            |
| AO090011000588                    | Urate oxidase                                      | 1.7.3.3   | URATEp + O2p + H2Op -> HIURTEp + H2O2p | BLASTP            |
| No_Gene                           | Hydroxyisourate hydrolase (Spontaneous conversion) | 3.5.2.17  | HIURTE + H2O -> ATN + CO2              | BLASTP            |
| AO090001000480                    | IMP dehydrogenase                                  | 1.1.1.205 | IMP + NAD -> NADH + XMP                | BLASTP            |
| AO090001000481                    | IMP dehydrogenase                                  | 1.1.1.205 | IMP + NAD -> NADH + XMP                | BLASTP            |
| AO090120000224                    | IMP dehydrogenase                                  | 1.1.1.205 | IMP + NAD -> NADH + XMP                | BLASTP            |
| <b># Pyrimidine metabolism</b>    |                                                    |           |                                        |                   |
| AO090023000483/<br>AO090011000630 | Aspartate-carbamoyltransferase                     | 2.1.3.2   | CAP + ASP -> CAASP + PI                | BLASTP            |
| AO090005001052                    | Dihydroorotase                                     | 3.5.2.3   | CAASP <-> DOROA                        | GFAOP             |
| AO090026000542                    | Dihydroorotate oxidase                             | 1.3.3.1   | DOROAm + O2m <-> H2O2m + OROAm         | BLASTP            |
| AO090026000521                    | Orotate phosphoribosyltransferase                  | 2.4.2.10  | OROA + PRPP <-> PPI + OMP              | BLASTP            |
| AO090011000868                    | Orotidine 5'-phosphate decarboxylase               | 4.1.1.23  | OMP -> CO2 + UMP                       | BLASTP            |
| AO090026000815                    | Uridylate kinase                                   | 2.7.4.22  | ATP + UMP <-> ADP + UDP                | BLASTP            |
| AO090009000714                    | Uracil phosphoribosyltransferase                   | 2.4.2.9   | URA + PRPP -> UMP + PPI                | BLASTP            |
| AO090102000246                    | Uracil phosphoribosyltransferase                   | 2.4.2.9   | URA + PRPP -> UMP + PPI                | BLASTP            |
| AO090009000714                    | Cytosine deaminase                                 | 3.5.4.1   | CYTS + H2O -> URA + NH3                | BLASTP            |
| AO090003000802                    | Cytosine deaminase                                 | 3.5.4.1   | CYTS + H2O -> URA + NH3                | BLASTP            |
| AO090001000654                    | Uridine kinase                                     | 2.7.1.48  | URI + GTP <-> UMP + GDP                | BLASTP            |
| AO090001000654                    | Uridine kinase                                     | 2.7.1.48  | CYTD + GTP -> GDP + CMP                | BLASTP            |
| AO090001000654                    | Uridine kinase                                     | 2.7.1.48  | URI + ATP -> ADP + UMP                 | BLASTP            |
| GAP                               | Thymidine phosphorylase                            | 2.4.2.4   | DU + PI <-> URA + DR1P                 | NONE              |



| Gene name                                            | Enzyme name                                          | EC number | Biochemical reaction                               | Annotation method |
|------------------------------------------------------|------------------------------------------------------|-----------|----------------------------------------------------|-------------------|
| GAP                                                  | Thymidine phosphorylase                              | 2.4.2.4   | DT + PI <-> THY + DR1P                             | NONE              |
| AO090026000800                                       | Cytidine deaminase                                   | 3.5.4.5   | CYTD + H2O -> URI + NH3                            | BLASTP            |
| AO090026000800                                       | Cytidine deaminase                                   | 3.5.4.5   | DC -> NH3 + DU                                     | GFAOP             |
| ZY007112                                             | Cytidine deaminase                                   | 3.5.4.5   | CYTD + H2O -> URI + NH3                            | EST               |
| ZY007112                                             | Cytidine deaminase                                   | 3.5.4.5   | DC -> NH3 + DU                                     | EST               |
| AO090009000289                                       | Thioredoxin reductase                                | 1.8.1.9   | OTHIO + NADPH -> NADP + RTHIO                      | BLASTP            |
| AO090009000289                                       | Thioredoxin reductase                                | 1.8.1.9   | OTHIOm + NADPHm -> NADPm + RTHIOm                  | BLASTP            |
| AO090005000780                                       | dUTPase                                              | 3.6.1.23  | DUTP + H2O -> PPI + DUMP                           | BLASTP            |
| AO090206000066                                       | Thymidylate synthase                                 | 2.1.1.45  | DUMP + METTHF -> DHF + DTMP                        | BLASTP            |
| AO090026000606                                       | CTP synthase                                         | 6.3.4.2   | UTP + GLN + ATP -> GLU + CTP + ADP + PI            | BLASTP            |
| AO090026000606                                       | CTP synthase                                         | 6.3.4.2   | ATP + UTP + NH3 -> ADP + PI + CTP                  | BLASTP            |
| AO090009000691                                       | Pseudouridylate synthase                             | 4.2.1.70  | URA + R5P <-> PURI5P                               | BLASTP            |
| AO090120000348                                       | Pseudouridylate synthase                             | 4.2.1.70  | URA + R5P <-> PURI5P                               | BLASTP            |
| AO090011000855                                       | Pseudouridylate synthase                             | 4.2.1.70  | URA + R5P <-> PURI5P                               | BLASTP            |
| AO090001000741                                       | Deoxycytidylate deaminase                            | 3.5.4.12  | DCMP + H2O -> DUMP + NH3                           | BLASTP            |
| AO090001000742                                       | Deoxycytidylate deaminase                            | 3.5.4.12  | DCMP + H2O -> DUMP + NH3                           | BLASTP            |
| AO090009000391                                       | Uridine nucleosidase                                 | 3.2.2.3   | URI + H2O -> URA + RIB                             | GFAOP             |
| AO090023000483                                       | Carbamoyl-phosphate synthase (glutamine-hydrolysing) | 6.3.5.5   | GLN + 2 ATP + CO2 -> GLU + CAP + 2 ADP + PI        | BLASTP            |
| AO090701000214/<br>AO090010000199/<br>AO090011000630 | Carbamoyl-phosphate synthase (glutamine-hydrolysing) | 6.3.5.5   | GLNm + 2 ATPm + CO2m -> GLUm + CAPm + 2 ADPm + PIm | BLASTP            |
| AO090010000228                                       | Inosine triphosphate pyrophosphatase                 | 3.6.1.19  | UTP + H2O -> UMP + PPI                             | BLASTP            |
| AO090010000228                                       | Inosine triphosphate pyrophosphatase                 | 3.6.1.19  | DUTP + H2O -> DUMP + PPI                           | BLASTP            |
| AO090206000067                                       | Queuine tRNA-ribosyltransferase                      | 2.1.1.45  | DUMPm + METTHFm -> DHFm + DTMPm                    | BLASTP            |
| <b># Nucleotide salvage pathway</b>                  |                                                      |           |                                                    |                   |
| AO090038000610                                       | Adenine phosphoribosyltransferase                    | 2.4.2.7   | AD + PRPP -> PPI + AMP                             | BLASTP            |
| AO090011000781                                       | Adenosine deaminase                                  | 3.5.4.4   | ADN -> INS + NH3                                   | BLASTP            |
| AO090012000559                                       | Adenosine deaminase                                  | 3.5.4.4   | ADN -> INS + NH3                                   | BLASTP            |

| Gene name      | Enzyme name                                | EC number | Biochemical reaction         | Annotation method |
|----------------|--------------------------------------------|-----------|------------------------------|-------------------|
| AO090012000959 | Adenosine deaminase                        | 3.5.4.4   | ADN -> INS + NH <sub>3</sub> | BLASTP            |
| AO090001000546 | Purine-nucleoside phosphorylase            | 2.4.2.1   | DIN + PI <-> HYXN + DR1P     | GFAOP             |
| AO090001000546 | Purine-nucleoside phosphorylase            | 2.4.2.1   | DA + PI <-> AD + DR1P        | GFAOP             |
| AO090001000546 | Purine-nucleoside phosphorylase            | 2.4.2.1   | DG + PI <-> GN + DR1P        | GFAOP             |
| AO090001000546 | Purine-nucleoside phosphorylase            | 2.4.2.1   | HYXN + R1P <-> INS + PI      | GFAOP             |
| AO090001000546 | Purine-nucleoside phosphorylase            | 2.4.2.1   | AD + R1P <-> PI + ADN        | GFAOP             |
| AO090001000546 | Purine-nucleoside phosphorylase            | 2.4.2.1   | XAN + R1P <-> PI + XTSINE    | GFAOP             |
| AO090001000546 | Purine-nucleoside phosphorylase            | 2.4.2.1   | GSN + PI <-> GN + R1P        | GFAOP             |
| AO090206000037 | Xanthine-guanine phosphoribosyltransferase | 2.4.2.22  | XAN + PRPP -> XMP + PPI      | BLASTP            |
| AO090038000241 | Purine nucleosidase                        | 3.2.2.1   | GSN -> GN + RIB              | BLASTP            |
| AO090038000241 | Purine nucleosidase                        | 3.2.2.1   | ADN -> AD + RIB              | BLASTP            |
| AO090009000617 | Adenosine kinase                           | 2.7.1.20  | ADN + ATP -> AMP + ADP       | BLASTP            |
| AO090012001004 | Adenylate kinase                           | 2.7.4.3   | ATP + AMP <-> 2 ADP          | BLASTP            |
| AO090012001004 | Adenylate kinase                           | 2.7.4.3   | GTP + AMP <-> ADP + GDP      | BLASTP            |
| AO090012001004 | Adenylate kinase                           | 2.7.4.3   | ITP + AMP <-> ADP + IDP      | BLASTP            |
| AO090005000758 | Adenylate kinase                           | 2.7.4.3   | ATPm + AMPm <-> 2 ADPm       | BLASTP            |
| AO090005000758 | Adenylate kinase                           | 2.7.4.3   | GTPm + AMPm <-> ADPm + GDPm  | BLASTP            |
| AO090005000758 | Adenylate kinase                           | 2.7.4.3   | ITPm + AMPm <-> ADPm + IDPm  | BLASTP            |
| AO090102000558 | Nucleoside diphosphate kinase              | 2.7.4.6   | UDP + ATP <-> UTP + ADP      | GFAOP             |
| AO090102000558 | Nucleoside diphosphate kinase              | 2.7.4.6   | CDP + ATP <-> CTP + ADP      | GFAOP             |
| AO090102000558 | Nucleoside diphosphate kinase              | 2.7.4.6   | DGDP + ATP <-> DGTP + ADP    | GFAOP             |
| AO090102000558 | Nucleoside diphosphate kinase              | 2.7.4.6   | DUDP + ATP <-> DUTP + ADP    | GFAOP             |
| AO090102000558 | Nucleoside diphosphate kinase              | 2.7.4.6   | DCDP + ATP <-> DCTP + ADP    | GFAOP             |
| AO090102000558 | Nucleoside diphosphate kinase              | 2.7.4.6   | DTDP + ATP <-> DTTP + ADP    | GFAOP             |
| AO090102000558 | Nucleoside diphosphate kinase              | 2.7.4.6   | DADP + ATP <-> DATP + ADP    | GFAOP             |
| AO090102000558 | Nucleoside diphosphate kinase              | 2.7.4.6   | GDP + ATP <-> GTP + ADP      | GFAOP             |
| AO090102000558 | Nucleoside diphosphate kinase              | 2.7.4.6   | IDP + ATP <-> ITP + ADP      | GFAOP             |
| AO090012001004 | Deoxy-adenylate kinase                     | 2.7.4.11  | DAMP + ATP <-> DADP + ADP    | GFAOP             |
| AO090005000758 | Deoxy-adenylate kinase                     | 2.7.4.11  | DAMP + ATP <-> DADP + ADP    | GFAOP             |

| Gene name      | Enzyme name                                | EC number | Biochemical reaction        | Annotation method |
|----------------|--------------------------------------------|-----------|-----------------------------|-------------------|
| AO090012001004 | Adenylate kinase                           | 2.7.4.3   | ATP + AMP <-> 2 ADP         | BLASTP            |
| AO090005000758 | Adenylate kinase                           | 2.7.4.3   | ATP + AMP <-> 2 ADP         | BLASTP            |
| AO090011000781 | Adenosine deaminase                        | 3.5.4.2   | AD -> NH3 + HYXN            | BLASTP            |
| AO090009000617 | Adenosine kinase                           | 2.7.1.73  | INS + ATP -> IMP + ADP      | GFAOP             |
| AO090009000617 | Adenosine kinase                           | 2.7.1.73  | GSN + ATP -> GMP + ADP      | GFAOP             |
| AO090206000037 | Xanthine-guanine phosphoribosyltransferase | 2.4.2.8   | HYXN + PRPP -> PPI + IMP    | BLASTP            |
| AO090206000037 | Xanthine-guanine phosphoribosyltransferase | 2.4.2.8   | GN + PRPP -> PPI + GMP      | BLASTP            |
| GAP            | Pyrimidine-5'-nucleotide nucleosidase      | 3.2.2.10  | CMP -> CYTS + R5P           | NONE              |
| AO090103000444 | 5'-nucleotidase                            | 3.1.3.5   | DUMP -> DU + PI             | BLASTP            |
| AO090103000444 | 5'-nucleotidase                            | 3.1.3.5   | DTMP -> DT + PI             | BLASTP            |
| AO090103000444 | 5'-nucleotidase                            | 3.1.3.5   | DAMP -> DA + PI             | BLASTP            |
| AO090103000444 | 5'-nucleotidase                            | 3.1.3.5   | DGMP -> DG + PI             | BLASTP            |
| AO090103000444 | 5'-nucleotidase                            | 3.1.3.5   | DCMP -> DC + PI             | BLASTP            |
| AO090103000444 | 5'-nucleotidase                            | 3.1.3.5   | CMP -> CYTD + PI            | BLASTP            |
| AO090103000444 | 5'-nucleotidase                            | 3.1.3.5   | AMP -> PI + ADN             | BLASTP            |
| AO090103000444 | 5'-nucleotidase                            | 3.1.3.5   | GMP -> PI + GSN             | BLASTP            |
| AO090103000444 | 5'-nucleotidase                            | 3.1.3.5   | IMP -> PI + INS             | BLASTP            |
| AO090103000444 | 5'-nucleotidase                            | 3.1.3.5   | XMP -> PI + XTSINE          | BLASTP            |
| AO090103000444 | 5'-nucleotidase                            | 3.1.3.5   | UMP -> PI + URI             | BLASTP            |
| AO090023000916 | Ribonucleoside-diphosphate reductase       | 1.17.4.1  | ADP + RTHIO -> DADP + OTHIO | BLASTP            |
| AO090023000916 | Ribonucleoside-diphosphate reductase       | 1.17.4.1  | GDP + RTHIO -> DGDP + OTHIO | BLASTP            |
| AO090023000916 | Ribonucleoside-diphosphate reductase       | 1.17.4.1  | CDP + RTHIO -> DCDP + OTHIO | BLASTP            |
| AO090023000916 | Ribonucleoside-diphosphate reductase       | 1.17.4.1  | UDP + RTHIO -> DUDP + OTHIO | BLASTP            |
| AO090120000352 | Ribonucleoside-triphosphate reductase      | 1.17.4.2  | ATP + RTHIO -> DATP + OTHIO | BLASTP            |
| AO090120000352 | Ribonucleoside-triphosphate reductase      | 1.17.4.2  | GTP + RTHIO -> DGTP + OTHIO | BLASTP            |
| AO090120000352 | Ribonucleoside-triphosphate reductase      | 1.17.4.2  | CTP + RTHIO -> DCTP + OTHIO | BLASTP            |
| AO090120000352 | Ribonucleoside-triphosphate reductase      | 1.17.4.2  | UTP + RTHIO -> DUTP + OTHIO | BLASTP            |
| AO090001000329 | Nucleoside diphosphatase                   | 3.6.1.6   | UDP + H2O -> UMP + PI       | BLASTP            |
| AO090026000750 | Nucleoside diphosphatase                   | 3.6.1.6   | UDP + H2O -> UMP + PI       | BLASTP            |
| AO090001000329 | Nucleoside diphosphatase                   | 3.6.1.6   | GDP + H2O -> GMP + PI       | BLASTP            |
| AO090026000750 | Nucleoside diphosphatase                   | 3.6.1.6   | GDP + H2O -> GMP + PI       | BLASTP            |

| Gene name                                                                                                     | Enzyme name                                         | EC number | Biochemical reaction                 | Annotation method |
|---------------------------------------------------------------------------------------------------------------|-----------------------------------------------------|-----------|--------------------------------------|-------------------|
| AO090102000555                                                                                                | Thymidylate kinase                                  | 2.7.4.9   | DTMP + ATP <-> ADP + DTDP            | BLASTP            |
| AO090026000815                                                                                                | Uridylate kinase                                    | 2.7.4.14  | DCMP + ATP <-> ADP + DCDP            | BLASTP            |
| AO090026000815                                                                                                | Uridylate kinase                                    | 2.7.4.14  | CMP + ATP <-> ADP + CDP              | BLASTP            |
| AO090026000815                                                                                                | Uridylate kinase                                    | 2.7.4.14  | UMP + ATP <-> ADP + UDP              | BLASTP            |
| <b># 5. Lipid metabolism</b>                                                                                  |                                                     |           |                                      |                   |
| <b># Fatty acid biosynthesis</b>                                                                              |                                                     |           |                                      |                   |
| AO090124000084                                                                                                | Acetyl coenzyme A-acyl-carrier-protein transacylase | 2.3.1.38  | ACCOA + ACP -> ACACP + COA           | BLASTP            |
| AO090011000040                                                                                                | Acetyl coenzyme A-acyl-carrier-protein transacylase | 2.3.1.38  | ACCOA + ACP -> ACACP + COA           | BLASTP            |
| AO090011000838/<br>ZY098176                                                                                   | Acetyl-CoA carboxylase                              | 6.4.1.2   | CBCCP + ACCOA <-> BCCP + MALCOA      | EST, GFAOP        |
| AO090672000003                                                                                                | Malonyl CoA-acyl carrier protein transacylase       | 2.3.1.39  | MALCOA + ACP <-> MALACP + COA        | GFAOP             |
| AO090124000084                                                                                                | Malonyl CoA-acyl carrier protein transacylase       | 2.3.1.39  | MALCOA + ACP <-> MALACP + COA        | GFAOP             |
| AO090011000040                                                                                                | Malonyl CoA-acyl carrier protein transacylase       | 2.3.1.39  | MALCOA + ACP <-> MALACP + COA        | GFAOP             |
| AO090011000838                                                                                                | Biotin carboxylase                                  | 6.3.4.14  | ATP + BCCP + CO2 -> ADP + PI + CBCCP | BLASTP            |
| AO090001000695                                                                                                | 3-oxoacyl-[acyl-carrier-protein] synthase I         | 2.3.1.41  | ACACP + MALACP -> AACACP + CO2 + ACP | BLASTP            |
| AO090023000924/<br>AO090023000082/<br>AO090003000520/<br>AO090005000145/<br>AO090010000429/<br>AO090011000370 | 3-oxoacyl-[acyl-carrier-protein] reductase          | 1.1.1.100 | AACACP + NADPH <-> C4HACP + NADP     | BLASTP            |
| AO090124000084                                                                                                | Crotonoyl-[acyl-carrier-protein] hydratase          | 4.2.1.58  | C4HACP <-> C4DACP + H2O              | BLASTP            |
| AO090011000040                                                                                                | Crotonoyl-[acyl-carrier-protein] hydratase          | 4.2.1.58  | C4HACP <-> C4DACP + H2O              | BLASTP            |
| AO090124000084                                                                                                | Enoyl-[acyl-carrier-protein] reductase (NADH)       | 1.3.1.9   | C4DACP + NADPH <-> C40ACP + NADP     | BLASTP            |
| AO090011000040                                                                                                | Enoyl-[acyl-carrier-protein] reductase (NADH)       | 1.3.1.9   | C4DACP + NADPH <-> C40ACP + NADP     | BLASTP            |

| Gene name                                                                                                                                           | Enzyme name                                                                                    | EC number             | Biochemical reaction                                                      | Annotation method |
|-----------------------------------------------------------------------------------------------------------------------------------------------------|------------------------------------------------------------------------------------------------|-----------------------|---------------------------------------------------------------------------|-------------------|
| AO090010000107/<br>AO090010000171/<br>AO090026000012/<br>AO090124000083/<br>AO090010000156/<br>AO090011000040/<br>AO090124000084/<br>AO090011000046 | Fatty-acid synthase                                                                            | 2.3.1.85              | ACACP + MALACP + 2 NADPH -> C40ACP + ACP +<br>2 NADP + H2O + CO2          | BLASTP            |
| AO090001000695<br>AO090023000924/<br>AO090023000082/<br>AO090003000520/<br>AO090005000145/<br>AO090010000429/<br>AO090011000370                     | 3-oxoacyl-[acyl-carrier-protein] synthase I<br>3-oxoacyl-[acyl-carrier-protein] reductase      | 2.3.1.41<br>1.1.1.100 | C40ACP + MALACP -> C6OACP + CO2 + ACP<br>C6OACP + NADPH <-> C6HACP + NADP | BLASTP<br>BLASTP  |
| AO090124000084<br>AO090011000040                                                                                                                    | Crotonoyl-[acyl-carrier-protein] hydratase<br>Crotonoyl-[acyl-carrier-protein] hydratase       | 4.2.1.58<br>4.2.1.58  | C6HACP <-> C6DACP + H2O<br>C6HACP <-> C6DACP + H2O                        | BLASTP<br>BLASTP  |
| AO090124000084<br>AO090011000040                                                                                                                    | Enoyl-[acyl-carrier-protein] reductase (NADH)<br>Enoyl-[acyl-carrier-protein] reductase (NADH) | 1.3.1.9<br>1.3.1.9    | C6DACP + NADPH <-> C6OACP + NADP<br>C6DACP + NADPH <-> C6OACP + NADP      | BLASTP<br>BLASTP  |
| AO090010000107/<br>AO090010000171/<br>AO090026000012/<br>AO090124000083/<br>AO090010000156/<br>AO090011000040/<br>AO090124000084/<br>AO090011000046 | Fatty-acid synthase                                                                            | 2.3.1.85              | C40ACP + MALACP + 2 NADPH -> C60ACP + ACP +<br>2 NADP + H2O + CO2         | BLASTP            |

| Gene name                                                                                                                                           | Enzyme name                                          | EC number | Biochemical reaction                                           | Annotation method |
|-----------------------------------------------------------------------------------------------------------------------------------------------------|------------------------------------------------------|-----------|----------------------------------------------------------------|-------------------|
| AO090001000695                                                                                                                                      | 3-oxoacyl-[acyl-carrier-protein] synthase I          | 2.3.1.41  | C60ACP + MALACP -> C80ACP + CO2 + ACP                          | BLASTP            |
| AO090023000924/<br>AO090023000082/<br>AO090003000520/<br>AO090005000145/<br>AO090010000429/<br>AO090011000370                                       | 3-oxoacyl-[acyl-carrier-protein] reductase           | 1.1.1.100 | C80ACP + NADPH <-> C8HACP + NADP                               | BLASTP            |
| AO090124000084                                                                                                                                      | Crotonoyl-[acyl-carrier-protein] hydratase           | 4.2.1.58  | C8HACP <-> C8DACP + H2O                                        | BLASTP            |
| AO090011000040                                                                                                                                      | Crotonoyl-[acyl-carrier-protein] hydratase           | 4.2.1.58  | C8HACP <-> C8DACP + H2O                                        | BLASTP            |
| AO090124000084                                                                                                                                      | Enoyl-[acyl-carrier-protein] reductase (NADH)        | 1.3.1.9   | C8DACP + NADPH <-> C80ACP + NADP                               | BLASTP            |
| AO090011000040                                                                                                                                      | Enoyl-[acyl-carrier-protein] reductase (NADH)        | 1.3.1.9   | C8DACP + NADPH <-> C80ACP + NADP                               | BLASTP            |
| AO090010000107/<br>AO090010000171/<br>AO090026000012/<br>AO090124000083/<br>AO090010000156/<br>AO090011000040/<br>AO090124000084/<br>AO090011000046 | Fatty-acid synthase                                  | 2.3.1.85  | C60ACP + MALACP + 2 NADPH -> C80ACP + ACP + 2 NADP + H2O + CO2 | BLASTP            |
| AO090001000695                                                                                                                                      | 3-oxoacyl-[acyl-carrier-protein] synthase I          | 2.3.1.41  | C80ACP + MALACP -> C100ACP + CO2 + ACP                         | BLASTP            |
| AO090023000924/<br>AO090023000082/<br>AO090003000520/<br>AO090005000145/<br>AO090010000429/<br>AO090011000370                                       | 3-oxoacyl-[acyl-carrier-protein] reductase           | 1.1.1.100 | C100ACP + NADPH <-> C10HACP + NADP                             | BLASTP            |
| AO090124000084                                                                                                                                      | 3-hydroxydecanoyl-[acyl-carrier-protein] dehydratase | 4.2.1.60  | C10HACP <-> C10DACP + H2O                                      | BLASTP            |
| AO090011000040                                                                                                                                      | 3-hydroxydecanoyl-[acyl-carrier-protein] dehydratase | 4.2.1.60  | C10HACP <-> C10DACP + H2O                                      | BLASTP            |
| AO090124000084                                                                                                                                      | Enoyl-[acyl-carrier-protein] reductase (NADH)        | 1.3.1.9   | C10DACP + NADPH <-> C100ACP + NADP                             | BLASTP            |
| AO090011000040                                                                                                                                      | Enoyl-[acyl-carrier-protein] reductase (NADH)        | 1.3.1.9   | C10DACP + NADPH <-> C100ACP + NADP                             | BLASTP            |

| Gene name                                                                                                                                           | Enzyme name                                                                                    | EC number             | Biochemical reaction                                                          | Annotation method |
|-----------------------------------------------------------------------------------------------------------------------------------------------------|------------------------------------------------------------------------------------------------|-----------------------|-------------------------------------------------------------------------------|-------------------|
| AO090010000107/<br>AO090010000171/<br>AO090026000012/<br>AO090124000083/<br>AO090010000156/<br>AO090011000040/<br>AO090124000084/<br>AO090011000046 | Fatty-acid synthase                                                                            | 2.3.1.85              | C80ACP + MALACP + 2 NADPH -> C100ACP + ACP +<br>2 NADP + H2O + CO2            | BLASTP            |
| AO090001000695<br>AO090023000924/<br>AO090023000082/<br>AO090003000520/<br>AO090005000145/<br>AO090010000429/<br>AO090011000370                     | 3-oxoacyl-[acyl-carrier-protein] synthase I<br>3-oxoacyl-[acyl-carrier-protein] reductase      | 2.3.1.41<br>1.1.1.100 | C100ACP + MALACP -> C12OACP + CO2 + ACP<br>C12OACP + NADPH <-> C12HACP + NADP | BLASTP<br>BLASTP  |
| AO090124000084                                                                                                                                      | 3-hydroxypalmitoyl-[acyl-carrier-protein]<br>dehydratase                                       | 4.2.1.61              | C12HACP <-> C12DACP + H2O                                                     | BLASTP            |
| AO090011000040                                                                                                                                      | 3-hydroxypalmitoyl-[acyl-carrier-protein]<br>dehydratase                                       | 4.2.1.61              | C12HACP <-> C12DACP + H2O                                                     | BLASTP            |
| AO090124000084<br>AO090011000040                                                                                                                    | Enoyl-[acyl-carrier-protein] reductase (NADH)<br>Enoyl-[acyl-carrier-protein] reductase (NADH) | 1.3.1.9<br>1.3.1.9    | C12DACP + NADPH <-> C12OACP + NADP<br>C12DACP + NADPH <-> C12OACP + NADP      | BLASTP<br>BLASTP  |
| AO090010000107/<br>AO090010000171/<br>AO090026000012/<br>AO090124000083/<br>AO090010000156/<br>AO090011000040/<br>AO090124000084/<br>AO090011000046 | Fatty-acid synthase                                                                            | 2.3.1.85              | C100ACP + MALACP + 2 NADPH -> C120ACP + ACP +<br>2 NADP + H2O + CO2           | BLASTP            |
| AO090001000695                                                                                                                                      | 3-oxoacyl-[acyl-carrier-protein] synthase I                                                    | 2.3.1.41              | C120ACP + MALACP -> C14OACP + CO2 + ACP                                       | BLASTP            |

| Gene name                                                                                                                                           | Enzyme name                                           | EC number | Biochemical reaction                                             | Annotation method |
|-----------------------------------------------------------------------------------------------------------------------------------------------------|-------------------------------------------------------|-----------|------------------------------------------------------------------|-------------------|
| AO090023000924/<br>AO090023000082/<br>AO090003000520/<br>AO090005000145/<br>AO090010000429/<br>AO090011000370                                       | 3-oxoacyl-[acyl-carrier-protein] reductase            | 1.1.1.100 | C14OACP + NADPH <-> C14HACP + NADP                               | BLASTP            |
| AO090124000084                                                                                                                                      | 3-hydroxypalmitoyl-[acyl-carrier-protein] dehydratase | 4.2.1.61  | C14HACP <-> C14DACP + H2O                                        | BLASTP            |
| AO090011000040                                                                                                                                      | 3-hydroxypalmitoyl-[acyl-carrier-protein] dehydratase | 4.2.1.61  | C14HACP <-> C14DACP + H2O                                        | BLASTP            |
| AO090124000084                                                                                                                                      | Enoyl-[acyl-carrier-protein] reductase (NADH)         | 1.3.1.9   | C14DACP + NADPH <-> C14OACP + NADP                               | BLASTP            |
| AO090011000040                                                                                                                                      | Enoyl-[acyl-carrier-protein] reductase (NADH)         | 1.3.1.9   | C14DACP + NADPH <-> C14OACP + NADP                               | BLASTP            |
| AO090010000107/<br>AO090010000171/<br>AO090026000012/<br>AO090124000083/<br>AO090010000156/<br>AO090011000040/<br>AO090124000084/<br>AO090011000046 | Fatty-acid synthase                                   | 2.3.1.85  | C12OACP + MALACP + 2 NADPH -> C14OACP + ACP + 2 NADP + H2O + CO2 | BLASTP            |
| AO090001000695                                                                                                                                      | 3-oxoacyl-[acyl-carrier-protein] synthase I           | 2.3.1.41  | C14OACP + MALACP -> C16OACP + CO2 + ACP                          | BLASTP            |
| AO090023000924/<br>AO090023000082/<br>AO090003000520/<br>AO090005000145/<br>AO090010000429/<br>AO090011000370                                       | 3-oxoacyl-[acyl-carrier-protein] reductase            | 1.1.1.100 | C16OACP + NADPH <-> C16HACP + NADP                               | BLASTP            |
| AO090124000084                                                                                                                                      | 3-hydroxypalmitoyl-[acyl-carrier-protein] dehydratase | 4.2.1.61  | C16HACP <-> C16DACP + H2O                                        | BLASTP            |
| AO090011000040                                                                                                                                      | 3-hydroxypalmitoyl-[acyl-carrier-protein] dehydratase | 4.2.1.61  | C16HACP <-> C16DACP + H2O                                        | BLASTP            |
| AO090124000084                                                                                                                                      | Enoyl-[acyl-carrier-protein] reductase (NADH)         | 1.3.1.9   | C16DACP + NADPH <-> C16OACP + NADP                               | BLASTP            |
| AO090011000040                                                                                                                                      | Enoyl-[acyl-carrier-protein] reductase (NADH)         | 1.3.1.9   | C16DACP + NADPH <-> C16OACP + NADP                               | BLASTP            |



| Gene name                                                                                                                                                                               | Enzyme name                                                                                                           | EC number                           | Biochemical reaction                                                                                                                            | Annotation method          |
|-----------------------------------------------------------------------------------------------------------------------------------------------------------------------------------------|-----------------------------------------------------------------------------------------------------------------------|-------------------------------------|-------------------------------------------------------------------------------------------------------------------------------------------------|----------------------------|
| AO090010000107/<br>AO090010000171/<br>AO090026000012/<br>AO090124000083/<br>AO090010000156/<br>AO090011000040/<br>AO090124000084/<br>AO090011000046                                     | Fatty-acid synthase                                                                                                   | 2.3.1.85                            | C140ACP + MALACP + 2 NADPH -> C160ACP + ACP +<br>2 NADP + H2O + CO2                                                                             | BLASTP                     |
| AO090001000695<br>AO090023000924/<br>AO090023000082/<br>AO090003000520/<br>AO090005000145/<br>AO090010000429/<br>AO090011000370                                                         | 3-oxoacyl-[acyl-carrier-protein] synthase II<br>3-oxoacyl-[acyl-carrier-protein] reductase                            | 2.3.1.179<br>1.1.1.100              | C160ACP + MALACP -> C180ACP + CO2 + ACP<br>C180ACP + NADPH <-> C18HACP + NADP                                                                   | BLASTP<br>BLASTP           |
| AO090124000084<br>AO090011000040                                                                                                                                                        | 3-hydroxypalmitoyl-[acyl-carrier-protein]<br>dehydratase<br>3-hydroxypalmitoyl-[acyl-carrier-protein]<br>dehydratase  | 4.2.1.61<br>4.2.1.61                | C18HACP <-> C18DACP + H2O<br>C18HACP <-> C18DACP + H2O                                                                                          | BLASTP<br>BLASTP           |
| AO090124000084<br>AO090011000040<br>AO090010000107/<br>AO090010000171/<br>AO090026000012/<br>AO090124000083/<br>AO090010000156/<br>AO090011000040/<br>AO090124000084/<br>AO090011000046 | Enoyl-[acyl-carrier-protein] reductase (NADH)<br>Enoyl-[acyl-carrier-protein] reductase (NADH)<br>Fatty-acid synthase | 1.3.1.9<br>1.3.1.9<br>2.3.1.85      | C18DACP + NADPH <-> C180ACP + NADP<br>C18DACP + NADPH <-> C180ACP + NADP<br>C160ACP + MALACP + 2 NADPH -> C180ACP + ACP<br>+ 2 NADP + H2O + CO2 | BLASTP<br>BLASTP<br>BLASTP |
| AO090005000456<br>AO090102000339<br>AO090026000799                                                                                                                                      | Stearoyl-CoA 9-desaturase<br>Stearoyl-CoA 9-desaturase<br>Stearoyl-CoA 9-desaturase                                   | 1.14.19.1<br>1.14.19.1<br>1.14.19.1 | C180ACP + NADH + O2 -> C181ACP + NAD + 2 H2O<br>C180ACP + NADH + O2 -> C181ACP + NAD + 2 H2O<br>C180ACP + NADH + O2 -> C181ACP + NAD + 2 H2O    | BLASTP<br>BLASTP<br>BLASTP |

| Gene name      | Enzyme name                           | EC number | Biochemical reaction                         | Annotation method |
|----------------|---------------------------------------|-----------|----------------------------------------------|-------------------|
| AO090103000283 | Stearoyl-CoA 9-desaturase             | 1.14.19.1 | C180ACP + NADH + O2 -> C181ACP + NAD + 2 H2O | BLASTP            |
| AO090001000224 | Oleate delta-12 desaturase            | 1.14.19.3 | C181ACP + NADH + O2 -> C182ACP + NAD + 2 H2O | BLASTP            |
| AO090010000714 | Oleate delta-12 desaturase            | 1.14.19.3 | C181ACP + NADH + O2 -> C182ACP + NAD + 2 H2O | BLASTP            |
| GAP            | Stearoyl-CoA 15-desaturase            | 1.14.19.- | C182ACP + NADH + O2 -> C183ACP + NAD + 2 H2O | NONE              |
| AO090005000456 | Stearoyl-CoA 9-desaturase             | 1.14.19.1 | C160ACP + NADH + O2 -> C161ACP + NAD + 2 H2O | BLASTP            |
| AO090102000339 | Stearoyl-CoA 9-desaturase             | 1.14.19.1 | C160ACP + NADH + O2 -> C161ACP + NAD + 2 H2O | BLASTP            |
| AO090026000799 | Stearoyl-CoA 9-desaturase             | 1.14.19.1 | C160ACP + NADH + O2 -> C161ACP + NAD + 2 H2O | BLASTP            |
| AO090103000283 | Stearoyl-CoA 9-desaturase             | 1.14.19.1 | C160ACP + NADH + O2 -> C161ACP + NAD + 2 H2O | BLASTP            |
| AO090001000224 | Oleate delta-12 desaturase            | 1.14.19.3 | C161ACP + NADH + O2 -> C162ACP + NAD + 2 H2O | BLASTP            |
| AO090010000714 | Oleate delta-12 desaturase            | 1.14.19.3 | C161ACP + NADH + O2 -> C162ACP + NAD + 2 H2O | BLASTP            |
| AO090124000084 | Acyl-[acyl-carrier-protein] hydrolase | 3.1.2.14  | C40ACP + H2O -> C40 + ACP                    | BLASTP            |
| AO090011000040 | Acyl-[acyl-carrier-protein] hydrolase | 3.1.2.14  | C40ACP + H2O -> C40 + ACP                    | BLASTP            |
| AO090124000084 | Acyl-[acyl-carrier-protein] hydrolase | 3.1.2.14  | C60ACP + H2O -> C60 + ACP                    | BLASTP            |
| AO090011000040 | Acyl-[acyl-carrier-protein] hydrolase | 3.1.2.14  | C60ACP + H2O -> C60 + ACP                    | BLASTP            |
| AO090124000084 | Acyl-[acyl-carrier-protein] hydrolase | 3.1.2.14  | C80ACP + H2O -> C80 + ACP                    | BLASTP            |
| AO090011000040 | Acyl-[acyl-carrier-protein] hydrolase | 3.1.2.14  | C80ACP + H2O -> C80 + ACP                    | BLASTP            |
| AO090124000084 | Acyl-[acyl-carrier-protein] hydrolase | 3.1.2.14  | C100ACP + H2O -> C100 + ACP                  | BLASTP            |
| AO090011000040 | Acyl-[acyl-carrier-protein] hydrolase | 3.1.2.14  | C100ACP + H2O -> C100 + ACP                  | BLASTP            |
| AO090124000084 | Acyl-[acyl-carrier-protein] hydrolase | 3.1.2.14  | C120ACP + H2O -> C120 + ACP                  | BLASTP            |
| AO090011000040 | Acyl-[acyl-carrier-protein] hydrolase | 3.1.2.14  | C120ACP + H2O -> C120 + ACP                  | BLASTP            |
| AO090124000084 | Acyl-[acyl-carrier-protein] hydrolase | 3.1.2.14  | C140ACP + H2O -> C140 + ACP                  | BLASTP            |
| AO090011000040 | Acyl-[acyl-carrier-protein] hydrolase | 3.1.2.14  | C140ACP + H2O -> C140 + ACP                  | BLASTP            |
| AO090124000084 | Acyl-[acyl-carrier-protein] hydrolase | 3.1.2.14  | C160ACP + H2O -> C160 + ACP                  | BLASTP            |
| AO090011000040 | Acyl-[acyl-carrier-protein] hydrolase | 3.1.2.14  | C160ACP + H2O -> C160 + ACP                  | BLASTP            |
| AO090124000084 | Acyl-[acyl-carrier-protein] hydrolase | 3.1.2.14  | C161ACP + H2O -> C161 + ACP                  | BLASTP            |
| AO090011000040 | Acyl-[acyl-carrier-protein] hydrolase | 3.1.2.14  | C161ACP + H2O -> C161 + ACP                  | BLASTP            |
| AO090124000084 | Acyl-[acyl-carrier-protein] hydrolase | 3.1.2.14  | C162ACP + H2O -> C162 + ACP                  | BLASTP            |
| AO090011000040 | Acyl-[acyl-carrier-protein] hydrolase | 3.1.2.14  | C162ACP + H2O -> C162 + ACP                  | BLASTP            |
| AO090124000084 | Acyl-[acyl-carrier-protein] hydrolase | 3.1.2.14  | C180ACP + H2O -> C180 + ACP                  | BLASTP            |
| AO090011000040 | Acyl-[acyl-carrier-protein] hydrolase | 3.1.2.14  | C180ACP + H2O -> C180 + ACP                  | BLASTP            |

| Gene name                      | Enzyme name                           | EC number | Biochemical reaction                          | Annotation method |
|--------------------------------|---------------------------------------|-----------|-----------------------------------------------|-------------------|
| AO090124000084                 | Acyl-[acyl-carrier-protein] hydrolase | 3.1.2.14  | C181ACP + H2O -> C181 + ACP                   | BLASTP            |
| AO090011000040                 | Acyl-[acyl-carrier-protein] hydrolase | 3.1.2.14  | C181ACP + H2O -> C181 + ACP                   | BLASTP            |
| AO090124000084                 | Acyl-[acyl-carrier-protein] hydrolase | 3.1.2.14  | C182ACP + H2O -> C182 + ACP                   | BLASTP            |
| AO090011000040                 | Acyl-[acyl-carrier-protein] hydrolase | 3.1.2.14  | C182ACP + H2O -> C182 + ACP                   | BLASTP            |
| AO090124000084                 | Acyl-[acyl-carrier-protein] hydrolase | 3.1.2.14  | C183ACP + H2O -> C183 + ACP                   | BLASTP            |
| AO090011000040                 | Acyl-[acyl-carrier-protein] hydrolase | 3.1.2.14  | C183ACP + H2O -> C183 + ACP                   | BLASTP            |
| <b># Fatty acid metabolism</b> |                                       |           |                                               |                   |
| AO090102000633                 | Long-chain-fatty-acid-CoA ligase      | 6.2.1.3   | C40 + COA + ATP -> C40COA + H2O + PPI + AMP   | BLASTP            |
| AO090102000634                 | Long-chain-fatty-acid-CoA ligase      | 6.2.1.3   | C40 + COA + ATP -> C40COA + H2O + PPI + AMP   | BLASTP            |
| AO090011000642                 | Long-chain-fatty-acid-CoA ligase      | 6.2.1.3   | C40 + COA + ATP -> C40COA + H2O + PPI + AMP   | BLASTP            |
| AO090023000529                 | Long-chain-fatty-acid-CoA ligase      | 6.2.1.3   | C40 + COA + ATP -> C40COA + H2O + PPI + AMP   | BLASTP            |
| AO090038000487                 | Long-chain-fatty-acid-CoA ligase      | 6.2.1.3   | C40 + COA + ATP -> C40COA + H2O + PPI + AMP   | BLASTP            |
| AO090102000633                 | Long-chain-fatty-acid-CoA ligase      | 6.2.1.3   | C60 + COA + ATP -> C60COA + H2O + PPI + AMP   | BLASTP            |
| AO090102000634                 | Long-chain-fatty-acid-CoA ligase      | 6.2.1.3   | C60 + COA + ATP -> C60COA + H2O + PPI + AMP   | BLASTP            |
| AO090011000642                 | Long-chain-fatty-acid-CoA ligase      | 6.2.1.3   | C60 + COA + ATP -> C60COA + H2O + PPI + AMP   | BLASTP            |
| AO090023000529                 | Long-chain-fatty-acid-CoA ligase      | 6.2.1.3   | C60 + COA + ATP -> C60COA + H2O + PPI + AMP   | BLASTP            |
| AO090038000487                 | Long-chain-fatty-acid-CoA ligase      | 6.2.1.3   | C60 + COA + ATP -> C60COA + H2O + PPI + AMP   | BLASTP            |
| AO090102000633                 | Long-chain-fatty-acid-CoA ligase      | 6.2.1.3   | C80 + COA + ATP -> C80COA + H2O + PPI + AMP   | BLASTP            |
| AO090102000634                 | Long-chain-fatty-acid-CoA ligase      | 6.2.1.3   | C80 + COA + ATP -> C80COA + H2O + PPI + AMP   | BLASTP            |
| AO090011000642                 | Long-chain-fatty-acid-CoA ligase      | 6.2.1.3   | C80 + COA + ATP -> C80COA + H2O + PPI + AMP   | BLASTP            |
| AO090023000529                 | Long-chain-fatty-acid-CoA ligase      | 6.2.1.3   | C80 + COA + ATP -> C80COA + H2O + PPI + AMP   | BLASTP            |
| AO090038000487                 | Long-chain-fatty-acid-CoA ligase      | 6.2.1.3   | C80 + COA + ATP -> C80COA + H2O + PPI + AMP   | BLASTP            |
| AO090102000633                 | Long-chain-fatty-acid-CoA ligase      | 6.2.1.3   | C100 + COA + ATP -> C100COA + H2O + PPI + AMP | BLASTP            |
| AO090102000634                 | Long-chain-fatty-acid-CoA ligase      | 6.2.1.3   | C100 + COA + ATP -> C100COA + H2O + PPI + AMP | BLASTP            |
| AO090011000642                 | Long-chain-fatty-acid-CoA ligase      | 6.2.1.3   | C100 + COA + ATP -> C100COA + H2O + PPI + AMP | BLASTP            |
| AO090023000529                 | Long-chain-fatty-acid-CoA ligase      | 6.2.1.3   | C100 + COA + ATP -> C100COA + H2O + PPI + AMP | BLASTP            |
| AO090038000487                 | Long-chain-fatty-acid-CoA ligase      | 6.2.1.3   | C100 + COA + ATP -> C100COA + H2O + PPI + AMP | BLASTP            |
| AO090102000633                 | Long-chain-fatty-acid-CoA ligase      | 6.2.1.3   | C120 + COA + ATP -> C120COA + H2O + PPI + AMP | BLASTP            |
| AO090102000634                 | Long-chain-fatty-acid-CoA ligase      | 6.2.1.3   | C120 + COA + ATP -> C120COA + H2O + PPI + AMP | BLASTP            |
| AO090011000642                 | Long-chain-fatty-acid-CoA ligase      | 6.2.1.3   | C120 + COA + ATP -> C120COA + H2O + PPI + AMP | BLASTP            |
| AO090023000529                 | Long-chain-fatty-acid-CoA ligase      | 6.2.1.3   | C120 + COA + ATP -> C120COA + H2O + PPI + AMP | BLASTP            |



| Gene name                                                                                                                  | Enzyme name                            | EC number | Biochemical reaction                          | Annotation method |
|----------------------------------------------------------------------------------------------------------------------------|----------------------------------------|-----------|-----------------------------------------------|-------------------|
| AO090102000633                                                                                                             | Long-chain-fatty-acid-CoA ligase       | 6.2.1.3   | C182 + COA + ATP -> C182COA + H2O + PPI + AMP | BLASTP            |
| AO090102000634                                                                                                             | Long-chain-fatty-acid-CoA ligase       | 6.2.1.3   | C182 + COA + ATP -> C182COA + H2O + PPI + AMP | BLASTP            |
| AO090011000642                                                                                                             | Long-chain-fatty-acid-CoA ligase       | 6.2.1.3   | C182 + COA + ATP -> C182COA + H2O + PPI + AMP | BLASTP            |
| AO090023000529                                                                                                             | Long-chain-fatty-acid-CoA ligase       | 6.2.1.3   | C182 + COA + ATP -> C182COA + H2O + PPI + AMP | BLASTP            |
| AO090038000487                                                                                                             | Long-chain-fatty-acid-CoA ligase       | 6.2.1.3   | C182 + COA + ATP -> C182COA + H2O + PPI + AMP | BLASTP            |
| AO090102000633                                                                                                             | Long-chain-fatty-acid-CoA ligase       | 6.2.1.3   | C183 + COA + ATP -> C183COA + H2O + PPI + AMP | BLASTP            |
| AO090102000634                                                                                                             | Long-chain-fatty-acid-CoA ligase       | 6.2.1.3   | C183 + COA + ATP -> C183COA + H2O + PPI + AMP | BLASTP            |
| AO090011000642                                                                                                             | Long-chain-fatty-acid-CoA ligase       | 6.2.1.3   | C183 + COA + ATP -> C183COA + H2O + PPI + AMP | BLASTP            |
| AO090023000529                                                                                                             | Long-chain-fatty-acid-CoA ligase       | 6.2.1.3   | C183 + COA + ATP -> C183COA + H2O + PPI + AMP | BLASTP            |
| AO090038000487                                                                                                             | Long-chain-fatty-acid-CoA ligase       | 6.2.1.3   | C183 + COA + ATP -> C183COA + H2O + PPI + AMP | BLASTP            |
| AO090005000482                                                                                                             | Very-long-chain acyl-CoA dehydrogenase | 1.3.99.13 | C180COAm + FADm -> C18DCOAm + FADH2m          | BLASTP            |
| AO090005000521/<br>AO090009000596/<br>AO090102000172/<br>AO090012000150/<br>AO090005000494/<br>AO090023000711/<br>ZY077810 | Acyl-CoA dehydrogenase                 | 1.3.99.3  | C180COAm + FADm -> C18DCOAm + FADH2m          | EST, BLASTP       |
| AO090005000479                                                                                                             | Acyl-coenzyme A oxidase                | 1.3.3.6   | C180COAm + O2m -> C18DCOAm + H2O2m            | GFAOP             |
| AO090011000575                                                                                                             | Enoyl-CoA hydratase                    | 4.2.1.17  | C18DCOAm + H2Om <-> C18HCOAm                  | GFAOP             |
| AO090001000629/<br>AO090026000443/<br>AO090009000113/<br>AO090026000411/<br>AO090103000436                                 | 3-hydroxyacyl-CoA dehydrogenase        | 1.1.1.35  | C18HCOAm + NADm <-> C18OCOAm + NADHm          | BLASTP            |
| AO090003001121/<br>AO090005000090/<br>AO090026000515/<br>AO090012000715                                                    | Acetyl-CoA C-acyltransferase           | 2.3.1.16  | C18OCOAm + COAm <-> ACCOAm + C160COAm         | BLASTP            |
| AO090005000482                                                                                                             | Very-long-chain acyl-CoA dehydrogenase | 1.3.99.13 | C160COAm + FADm -> C16DCOAm + FADH2m          | BLASTP            |

| Gene name                                                                                                                  | Enzyme name                            | EC number | Biochemical reaction                  | Annotation method |
|----------------------------------------------------------------------------------------------------------------------------|----------------------------------------|-----------|---------------------------------------|-------------------|
| AO090005000521/<br>AO090009000596/<br>AO090102000172/<br>AO090012000150/<br>AO090005000494/<br>AO090023000711/<br>ZY077810 | Acyl-CoA dehydrogenase                 | 1.3.99.3  | C160COAm + FADm -> C16DCOAm + FADH2m  | EST, BLASTP       |
| AO090005000479                                                                                                             | Acyl-coenzyme A oxidase                | 1.3.3.6   | C160COAm + O2m -> C16DCOAm + H2O2m    | GFAOP             |
| AO090011000575                                                                                                             | Enoyl-CoA hydratase                    | 4.2.1.17  | C16DCOAm + H2Om <-> C16HCOAm          | GFAOP             |
| AO090001000629/<br>AO090026000443/<br>AO090009000113/<br>AO090026000411/<br>AO090103000436                                 | 3-hydroxyacyl-CoA dehydrogenase        | 1.1.1.35  | C16HCOAm + NADm <-> C16OCOAm + NADHm  | BLASTP            |
| AO090003001121/<br>AO090005000090/<br>AO090026000515/<br>AO090012000715                                                    | Acetyl-CoA C-acyltransferase           | 2.3.1.16  | C16OCOAm + COAm <-> ACCOAm + C140COAm | BLASTP            |
| AO090005000482                                                                                                             | Very-long-chain acyl-CoA dehydrogenase | 1.3.99.13 | C140COAm + FADm -> C14DCOAm + FADH2m  | BLASTP            |
| AO090005000521/<br>AO090009000596/<br>AO090102000172/<br>AO090012000150/<br>AO090005000494/<br>AO090023000711/<br>ZY077810 | Acyl-CoA dehydrogenase                 | 1.3.99.3  | C140COAm + FADm -> C14DCOAm + FADH2m  | EST, BLASTP       |
| AO090005000479                                                                                                             | Acyl-coenzyme A oxidase                | 1.3.3.6   | C140COAm + O2m -> C14DCOAm + H2O2m    | GFAOP             |
| AO090011000575                                                                                                             | Enoyl-CoA hydratase                    | 4.2.1.17  | C14DCOAm + H2Om <-> C14HCOAm          | GFAOP             |
| AO090001000629/<br>AO090026000443/<br>AO090009000113/<br>AO090026000411/<br>AO090103000436                                 | 3-hydroxyacyl-CoA dehydrogenase        | 1.1.1.35  | C14HCOAm + NADm <-> C14OCOAm + NADHm  | BLASTP            |

| Gene name                                                                                                                                    | Enzyme name                            | EC number | Biochemical reaction                  | Annotation method |
|----------------------------------------------------------------------------------------------------------------------------------------------|----------------------------------------|-----------|---------------------------------------|-------------------|
| AO090003001121/<br>AO090005000090/<br>AO090026000515/<br>AO090012000715                                                                      | Acetyl-CoA C-acyltransferase           | 2.3.1.16  | C14OCOAm + COAm <-> ACCOAm + C120COAm | BLASTP            |
| AO090005000482<br>AO090005000521/<br>AO090009000596/<br>AO090102000172/<br>AO090012000150/<br>AO090005000494/<br>AO090023000711/<br>ZY077810 | Very-long-chain acyl-CoA dehydrogenase | 1.3.99.13 | C120COAm + FADm -> C12DCOAm + FADH2m  | BLASTP            |
| AO090005000521/<br>AO090009000596/<br>AO090102000172/<br>AO090012000150/<br>AO090005000494/<br>AO090023000711/<br>ZY077810                   | Acyl-CoA dehydrogenase                 | 1.3.99.3  | C120COAm + FADm -> C12DCOAm + FADH2m  | EST, BLASTP       |
| AO090005000479<br>AO090011000575<br>AO090001000629/<br>AO090026000443/<br>AO090009000113/<br>AO090026000411/<br>AO090103000436               | Acyl-coenzyme A oxidase                | 1.3.3.6   | C120COAm + O2m -> C12DCOAm + H2O2m    | GFAOP             |
| AO090011000575<br>AO090001000629/<br>AO090026000443/<br>AO090009000113/<br>AO090026000411/<br>AO090103000436                                 | Enoyl-CoA hydratase                    | 4.2.1.17  | C12DCOAm + H2Om <-> C12HCOAm          | GFAOP             |
| AO090001000629/<br>AO090026000443/<br>AO090009000113/<br>AO090026000411/<br>AO090103000436                                                   | 3-hydroxyacyl-CoA dehydrogenase        | 1.1.1.35  | C12HCOAm + NADm <-> C12OCOAm + NADHm  | BLASTP            |
| AO090003001121/<br>AO090005000090/<br>AO090026000515/<br>AO090012000715                                                                      | Acetyl-CoA C-acyltransferase           | 2.3.1.16  | C12OCOAm + COAm <-> ACCOAm + C100COAm | BLASTP            |
| AO090005000482<br>AO090005000521/<br>AO090009000596/<br>AO090102000172/<br>AO090012000150/<br>AO090005000494/<br>AO090023000711/<br>ZY077810 | Very-long-chain acyl-CoA dehydrogenase | 1.3.99.13 | C100COAm + FADm -> C10DCOAm + FADH2m  | BLASTP            |
| AO090005000521/<br>AO090009000596/<br>AO090102000172/<br>AO090012000150/<br>AO090005000494/<br>AO090023000711/<br>ZY077810                   | Acyl-CoA dehydrogenase                 | 1.3.99.3  | C100COAm + FADm -> C10DCOAm + FADH2m  | EST, BLASTP       |
| AO090005000479<br>AO090011000575                                                                                                             | Acyl-coenzyme A oxidase                | 1.3.3.6   | C100COAm + O2m -> C10DCOAm + H2O2m    | GFAOP             |
| AO090011000575                                                                                                                               | Enoyl-CoA hydratase                    | 4.2.1.17  | C10DCOAm + H2Om <-> C10HCOAm          | GFAOP             |

| Gene name                                                                                                                  | Enzyme name                            | EC number | Biochemical reaction                 | Annotation method |
|----------------------------------------------------------------------------------------------------------------------------|----------------------------------------|-----------|--------------------------------------|-------------------|
| AO090001000629/<br>AO090026000443/<br>AO090009000113/<br>AO090026000411/<br>AO090103000436                                 | 3-hydroxyacyl-CoA dehydrogenase        | 1.1.1.35  | C10HCOAm + NADm <-> C10OCOAm + NADHm | BLASTP            |
| AO090003001121/<br>AO090005000090/<br>AO090026000515/<br>AO090012000715                                                    | Acetyl-CoA C-acyltransferase           | 2.3.1.16  | C10OCOAm + COAm <-> ACCOAm + C80COAm | BLASTP            |
| AO090005000482                                                                                                             | Very-long-chain acyl-CoA dehydrogenase | 1.3.99.13 | C80COAm + FADm -> C8DCOAm + FADH2m   | BLASTP            |
| AO090005000521/<br>AO090009000596/<br>AO090102000172/<br>AO090012000150/<br>AO090005000494/<br>AO090023000711/<br>ZY077810 | Acyl-CoA dehydrogenase                 | 1.3.99.3  | C80COAm + FADm -> C8DCOAm + FADH2m   | EST, BLASTP       |
| AO090005000479                                                                                                             | Acyl-coenzyme A oxidase                | 1.3.3.6   | C80COAm + O2m -> C8DCOAm + H2O2m     | GFAOP             |
| AO090011000575                                                                                                             | Enoyl-CoA hydratase                    | 4.2.1.17  | C8DCOAm + H2Om <-> C8HCOAm           | GFAOP             |
| AO090001000629/<br>AO090026000443/<br>AO090009000113/<br>AO090026000411/<br>AO090103000436                                 | 3-hydroxyacyl-CoA dehydrogenase        | 1.1.1.35  | C8HCOAm + NADm <-> C8OCOAm + NADHm   | BLASTP            |
| AO090003001121/<br>AO090005000090/<br>AO090026000515/<br>AO090012000715                                                    | Acetyl-CoA C-acyltransferase           | 2.3.1.16  | C8OCOAm + COAm <-> ACCOAm + C60COAm  | BLASTP            |
| AO090103000106/<br>ZY077810                                                                                                | Acyl-CoA dehydrogenase                 | 1.3.99.3  | C60COAm + FADm -> C6DCOAm + FADH2m   | EST, GFAOP        |
| AO090005000479                                                                                                             | Acyl-coenzyme A oxidase                | 1.3.3.6   | C60COAm + O2m -> C6DCOAm + H2O2m     | GFAOP             |
| AO090011000575                                                                                                             | Enoyl-CoA hydratase                    | 4.2.1.17  | C6DCOAm + H2Om <-> C6HCOAm           | GFAOP             |



| Gene name                                                                                  | Enzyme name                     | EC number | Biochemical reaction                | Annotation method |
|--------------------------------------------------------------------------------------------|---------------------------------|-----------|-------------------------------------|-------------------|
| AO090001000629/<br>AO090026000443/<br>AO090009000113/<br>AO090026000411/<br>AO090103000436 | 3-hydroxyacyl-CoA dehydrogenase | 1.1.1.35  | C6HCOAm + NADm <-> C6OCOAm + NADHm  | BLASTP            |
| AO090003001121/<br>AO090005000090/<br>AO090026000515/<br>AO090012000715                    | Acetyl-CoA C-acyltransferase    | 2.3.1.16  | C6OCOAm + COAm <-> ACCOAm + C40COAm | BLASTP            |
| AO090103000106/<br>ZY077810                                                                | Acyl-CoA dehydrogenase          | 1.3.99.3  | C40COAm + FADm -> C4DCOAm + FADH2m  | EST, GFAOP        |
| AO090005000479                                                                             | Acyl-coenzyme A oxidase         | 1.3.3.6   | C40COAm + O2m -> C4DCOAm + H2O2m    | GFAOP             |
| AO090011000575                                                                             | Enoyl-CoA hydratase             | 4.2.1.17  | C4DCOAm + H2Om <-> C4HCOAm          | GFAOP             |
| AO090001000629/<br>AO090026000443/<br>AO090009000113/<br>AO090026000411/<br>AO090103000436 | 3-hydroxyacyl-CoA dehydrogenase | 1.1.1.35  | C4HCOAm + NADm <-> AACCOAm + NADHm  | BLASTP            |
| AO090003001121/<br>AO090005000090/<br>AO090026000515/<br>AO090012000715                    | Acetyl-CoA C-acyltransferase    | 2.3.1.16  | AACCOAm + COAm <-> 2 ACCOAm         | BLASTP            |
| <b># Glycerol metabolism</b>                                                               |                                 |           |                                     |                   |
| AO090120000396                                                                             | Dihydroxyacetone kinase         | 2.7.1.29  | GLYN + ATP -> T3P2 + ADP            | BLASTP            |
| AO090005000207                                                                             | Glycerol dehydrogenase          | 1.1.1.6   | GL + NAD -> GLYN + NADH             | BLASTP            |
| AO090010000381                                                                             | Glycerol dehydrogenase          | 1.1.1.6   | GL + NAD -> GLYN + NADH             | BLASTP            |
| AO090011000614                                                                             | Glycerol dehydrogenase          | 1.1.1.6   | GL + NAD -> GLYN + NADH             | BLASTP            |
| AO090038000442                                                                             | Glycerol dehydrogenase          | 1.1.1.6   | GL + NAD -> GLYN + NADH             | BLASTP            |
| AO090003001045                                                                             | Glycerol dehydrogenase (NADP)   | 1.1.1.72  | GLYAL + NADPH -> GL + NADP          | BLASTP            |
| AO090009000563                                                                             | Glycerol dehydrogenase (NADP)   | 1.1.1.72  | GLYAL + NADPH -> GL + NADP          | BLASTP            |
| AO090003001045                                                                             | Glycerol dehydrogenase (NADP)   | 1.1.1.72  | GLYN + NADPH -> GL + NADP           | BLASTP            |
| AO090009000563                                                                             | Glycerol dehydrogenase (NADP)   | 1.1.1.72  | GLYN + NADPH -> GL + NADP           | BLASTP            |
| AO090001000447                                                                             | Alcohol oxidase                 | 1.1.3.13  | GL + O2 -> GLYAL + H2O2             | GFAOP             |

| Gene name                             | Enzyme name                          | EC number  | Biochemical reaction               | Annotation method |
|---------------------------------------|--------------------------------------|------------|------------------------------------|-------------------|
| AO090001000230                        | Alcohol oxidase                      | 1.1.3.13   | GL + O2 -> GLYAL + H2O2            | GFAOP             |
| AO090001000447                        | Alcohol oxidase                      | 1.1.3.13   | GL + O2 -> GLYN + H2O2             | GFAOP             |
| AO090001000230                        | Alcohol oxidase                      | 1.1.3.13   | GL + O2 -> GLYN + H2O2             | GFAOP             |
| AO090005000125                        | NAD-dependent alcohol dehydrogenase  | 1.1.1.1    | GL + NAD <-> GLYAL + NADH          | BLASTP            |
| AO090012000375                        | NAD-dependent alcohol dehydrogenase  | 1.1.1.1    | GL + NAD <-> GLYAL + NADH          | BLASTP            |
| AO090009000634                        | NAD-dependent alcohol dehydrogenase  | 1.1.1.1    | GL + NAD <-> GLYAL + NADH          | BLASTP            |
| AO090038000108                        | NAD-dependent alcohol dehydrogenase  | 1.1.1.1    | GL + NAD <-> GLYAL + NADH          | BLASTP            |
| AO090003001407                        | NAD-dependent alcohol dehydrogenase  | 1.1.1.1    | GL + NAD <-> GLYAL + NADH          | BLASTP            |
| AO090010000668                        | NADP-dependent alcohol dehydrogenase | 1.1.1.2    | GL + NADP <-> GLYAL + NADPH        | BLASTP            |
| AO090005001358                        | NADP-dependent alcohol dehydrogenase | 1.1.1.2    | GL + NADP <-> GLYAL + NADPH        | BLASTP            |
| AO090023000460                        | NADP-dependent alcohol dehydrogenase | 1.1.1.2    | GL + NADP <-> GLYAL + NADPH        | BLASTP            |
| AO090003000751                        | NADP-dependent alcohol dehydrogenase | 1.1.1.2    | GL + NADP <-> GLYAL + NADPH        | BLASTP            |
| AO090003001067                        | Glycerol kinase                      | 2.7.1.30   | GL + ATP -> GL3P + ADP             | BLASTP            |
| AO090001000509                        | Glycerol kinase                      | 2.7.1.30   | GL + ATP -> GL3P + ADP             | BLASTP            |
| AO090005001646                        | Glycerol-3-phosphate dehydrogenase   | 1.1.99.5   | GL3P + FADm -> T3P2 + FADH2m       | BLASTP            |
| AO090005000038                        | Glycerol-3-phosphate dehydrogenase   | 1.1.99.5   | GL3P + FADm -> T3P2 + FADH2m       | BLASTP            |
| AO090011000879                        | Glycerol 3-phosphate dehydrogenase   | 1.1.1.8    | T3P2 + NADH -> GL3P + NAD          | BLASTP            |
| AO090005000883                        | Glycerol 3-phosphate dehydrogenase   | 1.1.1.8    | T3P2 + NADH -> GL3P + NAD          | BLASTP            |
| AO090038000367                        | Glycerol 3-phosphatase               | 3.1.3.21   | GL3P + H2O -> GL + PI              | BLASTP            |
| <b># Sterol metabolism</b>            |                                      |            |                                    |                   |
| AO090010000204                        | Squalene synthase                    | 2.5.1.21   | 2 FPP + NADPH -> NADP + SQL + 2 PI | BLASTP            |
| AO090701000685                        | Squalene monooxygenase               | 1.14.99.7  | SQL + O2 + NADP -> S23E + NADPH    | BLASTP            |
| <b># Ergosterol esters metabolism</b> |                                      |            |                                    |                   |
| AO090102000611                        | Oxidosqualene:lanosterol cyclase     | 5.4.99.7   | S23E -> LNST                       | BLASTP            |
| AO090020000194                        | Oxidosqualene:lanosterol cyclase     | 5.4.99.7   | S23E -> LNST                       | BLASTP            |
| AO090166000068                        | Oxidosqualene:lanosterol cyclase     | 5.4.99.7   | S23E -> LNST                       | BLASTP            |
| AO090003000205                        | Sterol 14-demethylase                | 1.14.13.70 | LNST + FADH2m + O2 -> IGST + FADm  | BLASTP            |
| AO090020000357                        | Sterol 14-demethylase                | 1.14.13.70 | LNST + FADH2m + O2 -> IGST + FADm  | BLASTP            |
| AO090026000842                        | Sterol 14-demethylase                | 1.14.13.70 | LNST + FADH2m + O2 -> IGST + FADm  | BLASTP            |

| Gene name      | Enzyme name                              | EC number  | Biochemical reaction                                                                                       | Annotation method |
|----------------|------------------------------------------|------------|------------------------------------------------------------------------------------------------------------|-------------------|
| AO090009000362 | C-14 sterol reductase                    | 1.3.1.70   | IGST + NADPH -> DMZYMST + NADP                                                                             | BLASTP            |
| AO090023000728 | C-14 sterol reductase                    | 1.3.1.70   | IGST + NADPH -> DMZYMST + NADP                                                                             | BLASTP            |
| AO090005000286 | C-4 methyl sterol oxidase                | 1.14.13.72 | 3 O2 + DMZYMST -> IMZYMST                                                                                  | BLASTP            |
| AO090010000667 | C-4 methyl sterol oxidase                | 1.14.13.72 | 3 O2 + DMZYMST -> IMZYMST                                                                                  | BLASTP            |
| AO090206000001 | C-4 methyl sterol oxidase                | 1.14.13.72 | 3 O2 + DMZYMST -> IMZYMST                                                                                  | BLASTP            |
| AO090120000187 | C-3 sterol dehydrogenase                 | 1.1.1.170  | IMZYMST -> IIMZYMST + CO2                                                                                  | BLASTP            |
| AO090003001070 | C-3 sterol keto reductase                | 1.1.1.270  | IIMZYMST + NADPH -> MZYMST + NADP                                                                          | BLASTP            |
| AO090005000286 | C-4 sterol methyl oxidase                | 1.14.13.72 | 3 O2 + MZYMST -> IZYMST                                                                                    | BLASTP            |
| AO090010000667 | C-4 sterol methyl oxidase                | 1.14.13.72 | 3 O2 + MZYMST -> IZYMST                                                                                    | BLASTP            |
| AO090206000001 | C-4 sterol methyl oxidase                | 1.14.13.72 | 3 O2 + MZYMST -> IZYMST                                                                                    | BLASTP            |
| AO090120000187 | C-3 sterol dehydrogenase                 | 1.1.1.170  | IZYMST -> IIZYMST + CO2                                                                                    | BLASTP            |
| AO090003001070 | 3-ketosteroid reductase                  | 1.1.1.270  | IIZYMST + NADPH -> ZYMST + NADP                                                                            | BLASTP            |
| AO090011000289 | Sterol 24-c-methyltransferase            | 2.1.1.41   | ZYMST + SAM -> FEST + SAH                                                                                  | BLASTP            |
| AO090012000932 | Sterol 24-c-methyltransferase            | 2.1.1.41   | ZYMST + SAM -> FEST + SAH                                                                                  | BLASTP            |
| AO090003000904 | C-8 sterol isomerase                     | 5.-.-.     | FEST -> EPST                                                                                               | BLASTP            |
| AO090005000286 | C-4 methyl sterol oxidase                | 1.14.13.72 | EPST + O2 + NADPH -> NADP + ERTROL                                                                         | BLASTP            |
| AO090010000667 | C-4 methyl sterol oxidase                | 1.14.13.72 | EPST + O2 + NADPH -> NADP + ERTROL                                                                         | BLASTP            |
| AO090206000001 | C-4 methyl sterol oxidase                | 1.14.13.72 | EPST + O2 + NADPH -> NADP + ERTROL                                                                         | BLASTP            |
| AO090003000954 | Sterol C-22 desaturase                   | 1.14.14.-  | ERTROL + O2 + NADPH -> NADP + ERTEOL                                                                       | BLASTP            |
| AO090012000966 | c-24(28) sterol reductase                | 1.3.1.71   | ERTEOL + NADPH -> ERGOST + NADP                                                                            | BLASTP            |
| AO090026000130 | c-24(28) sterol reductase                | 1.3.1.71   | ERTEOL + NADPH -> ERGOST + NADP                                                                            | BLASTP            |
| AO090005000559 | c-24(28) sterol reductase                | 1.3.1.71   | ERTEOL + NADPH -> ERGOST + NADP                                                                            | BLASTP            |
| GAP            | Diacylglycerol—sterol O-acyltransferase  | 2.3.1.73   | DAGLY + ERGOST -> MAGLY + ERGOSE                                                                           | NONE              |
| AO090020000490 | Triglyceride lipase-cholesterol esterase | 3.1.1.13   | ERGOSE + H2O -> ERGOST + 0.2720 C160 + 0.0051 C161 + 0.0304 C180 + 0.1534 C181 + 0.5573 C182 + 0.0404 C183 | BLASTP            |
| GAP            | Acylglycerol lipase                      | 3.1.1.23   | MAGLY + H2O -> GL + 0.2720 C160 + 0.0051 C161 + 0.0304 C180 + 0.1534 C181 + 0.5573 C182 + 0.0404 C183      | NONE              |

| Gene name                       | Enzyme name                               | EC number | Biochemical reaction                    | Annotation method |
|---------------------------------|-------------------------------------------|-----------|-----------------------------------------|-------------------|
| <b># Mevalonate pathway</b>     |                                           |           |                                         |                   |
| AO090103000406                  | Acetyl-CoA-acetyltransferase              | 2.3.1.9   | 2 ACCOAm <-> COAm + AACCOAm             | BLASTP            |
| AO090103000012                  | Acetyl-CoA-acetyltransferase              | 2.3.1.9   | 2 ACCOAp <-> COAp + AACCOAp             | BLASTP            |
| AO090023000421                  | Acetyl-CoA-acetyltransferase              | 2.3.1.9   | 2 ACCOA <-> COA + AACCOA                | BLASTP            |
| AO090003000611                  | Hydroxymethylglutaryl-CoA synthase        | 2.3.3.10  | H3MCOA + COA <-> ACCOA + AACCOA         | BLASTP            |
| AO090010000487                  | Hydroxymethylglutaryl-CoA synthase        | 2.3.3.10  | H3MCOA + COA <-> ACCOA + AACCOA         | BLASTP            |
| AO090103000311                  | HMG-CoA reductase                         | 1.1.1.34  | MVL + COA + 2 NADP <-> H3MCOA + 2 NADPH | BLASTP            |
| AO090120000217                  | HMG-CoA reductase                         | 1.1.1.34  | MVL + COA + 2 NADP <-> H3MCOA + 2 NADPH | BLASTP            |
| AO090023000793                  | Mevalonate kinase                         | 2.7.1.36  | ATP + MVL -> ADP + PMVL                 | BLASTP            |
| AO090010000471                  | Phosphomevalonate kinase                  | 2.7.4.2   | ATP + PMVL -> ADP + PPMVL               | BLASTP            |
| AO090023000862                  | Diphosphomevalonate decarboxylase         | 4.1.1.33  | ATP + PPMVL -> ADP + PI + IPPP + CO2    | BLASTP            |
| AO090023000500                  | Isopentenyl-diphosphate delta-isomerase   | 5.3.3.2   | IPPP <-> DMPP                           | BLASTP            |
| AO090023000391                  | Isopentenyl-diphosphate delta-isomerase   | 5.3.3.2   | IPPP <-> DMPP                           | BLASTP            |
| AO090102000358                  | Farnesyl-pyrophosphate synthetase         | 2.5.1.1   | DMPP + IPPP -> GPP + PPI                | BLASTP            |
| AO090102000358                  | Geranyltranstransferase                   | 2.5.1.10  | GPP + IPPP -> FPP + PPI                 | BLASTP            |
| AO090001000268                  | Geranylgeranylpyrophosphate synthetase    | 2.5.1.29  | FPP + IPPP -> PPI + GGPP                | BLASTP            |
| AO090012000573                  | Geranylgeranylpyrophosphate synthetase    | 2.5.1.29  | FPP + IPPP -> PPI + GGPP                | BLASTP            |
| AO090023000070                  | Geranylgeranylpyrophosphate synthetase    | 2.5.1.29  | FPP + IPPP -> PPI + GGPP                | BLASTP            |
| AO090038000495                  | Geranylgeranylpyrophosphate synthetase    | 2.5.1.29  | FPP + IPPP -> PPI + GGPP                | BLASTP            |
| AO090113000170                  | Geranylgeranylpyrophosphate synthetase    | 2.5.1.29  | FPP + IPPP -> PPI + GGPP                | BLASTP            |
| AO090120000064                  | Geranylgeranylpyrophosphate synthetase    | 2.5.1.29  | FPP + IPPP -> PPI + GGPP                | BLASTP            |
| AO090701000221                  | Geranylgeranylpyrophosphate synthetase    | 2.5.1.29  | FPP + IPPP -> PPI + GGPP                | BLASTP            |
| AO090009000093                  | Geranylgeranylpyrophosphate synthetase    | 2.5.1.29  | FPP + IPPP -> PPI + GGPP                | BLASTP            |
| AO090012000686                  | Geranylgeranylpyrophosphate synthetase    | 2.5.1.29  | FPP + IPPP -> PPI + GGPP                | BLASTP            |
| ZY088142                        | Di-trans,poly-cis-decaprenylcitransferase | 2.5.1.31  | FPP + IPPP -> PPI + TTGGP               | EST               |
| <b># Cholesterol Metabolism</b> |                                           |           |                                         |                   |
| AO090005001216                  | Cholestenol delta-isomerase               | 5.3.3.5   | ZYMST -> CHORESTA                       | BLASTP            |
| AO090026000084                  | Cholestenol delta-isomerase               | 5.3.3.5   | ZYMST -> CHORESTA                       | BLASTP            |
| ZY097910                        | Cholestenol delta-isomerase               | 5.3.3.5   | ZYMST -> CHORESTA                       | EST               |
| GAP                             | Delta-24-sterol reductase                 | 1.3.1.72  | CHORESTA + NADPH -> LTST + NADP         | NONE              |

| Gene name                        | Enzyme name                              | EC number           | Biochemical reaction                                                                                                      | Annotation method |
|----------------------------------|------------------------------------------|---------------------|---------------------------------------------------------------------------------------------------------------------------|-------------------|
| AO090005001107                   | Sterol delta 5,6-desaturase              | 1.3.3.2             | LTST + NADH + O2 -> 7DECHORES + NAD + H2O                                                                                 | BLASTP            |
| AO090103000138                   | Sterol delta 5,6-desaturase              | 1.3.3.2             | LTST + NADH + O2 -> 7DECHORES + NAD + H2O                                                                                 | BLASTP            |
| AO090701000022                   | Sterol delta 5,6-desaturase              | 1.3.3.2             | LTST + NADH + O2 -> 7DECHORES + NAD + H2O                                                                                 | BLASTP            |
| AO090003000792                   | 7-dehydrocholesterol reductase           | 1.3.1.21            | 7DECHORES + NADPH -> CHOREOL + NADP                                                                                       | GFAOP             |
| AO090009000480                   | Sterol o-acyltransferase                 | 2.3.1.26            | ACOA + CHOREOL -> COA + CHOREOLESTR                                                                                       | BLASTP            |
| <b># Phospholipid metabolism</b> |                                          |                     |                                                                                                                           |                   |
| AO090003001084                   | Glycerol-3-phosphate acyltransferase     | 2.3.1.15            | GL3P + 0.5856 C160ACP + 0.0144 C161ACP + 0.0543 C180ACP + 0.4261 C181ACP + 1.9754 C182ACP + 0.0744 C183ACP -> AGL3P + ACP | BLASTP            |
| AO090701000835                   | Glycerol-3-phosphate acyltransferase     | 2.3.1.15            | GL3P + 0.5856 C160ACP + 0.0144 C161ACP + 0.0543 C180ACP + 0.4261 C181ACP + 1.9754 C182ACP + 0.0744 C183ACP -> AGL3P + ACP | BLASTP            |
| AO090003001084                   | Glycerol-3-phosphate acyltransferase     | 2.3.1.15            | T3P2 + 0.5856 C160ACP + 0.0144 C161ACP + 0.0543 C180ACP + 0.4261 C181ACP + 1.9754 C182ACP + 0.0744 C183ACP -> AT3P2 + ACP | BLASTP            |
| AO090701000835                   | Glycerol-3-phosphate acyltransferase     | 2.3.1.15            | T3P2 + 0.5856 C160ACP + 0.0144 C161ACP + 0.0543 C180ACP + 0.4261 C181ACP + 1.9754 C182ACP + 0.0744 C183ACP -> AT3P2 + ACP | BLASTP            |
| AO090023000308                   | Diacylglycerol pyrophosphate phosphatase | 3.1.3.-<br>/3.1.3.4 | PA -> DAGLY + PI                                                                                                          | BLASTP            |
| AO090012000871                   | Diacylglycerol pyrophosphate phosphatase | 3.1.3.-<br>/3.1.3.4 | PA -> DAGLY + PI                                                                                                          | BLASTP            |
| AO090103000232                   | Diacylglycerol pyrophosphate phosphatase | 3.1.3.-<br>/3.1.3.4 | PA -> DAGLY + PI                                                                                                          | BLASTP            |
| AO090023000635                   | Diacylglycerol pyrophosphate phosphatase | 3.1.3.-<br>/3.1.3.4 | PA -> DAGLY + PI                                                                                                          | BLASTP            |
| AO090023000308                   | Diacylglycerol pyrophosphate phosphatase | 3.1.3.-<br>/3.1.3.4 | DGPP -> PA + PI                                                                                                           | BLASTP            |
| AO090023000635                   | Diacylglycerol pyrophosphate phosphatase | 3.1.3.-<br>/3.1.3.4 | DGPP -> PA + PI                                                                                                           | BLASTP            |

| Gene name      | Enzyme name                                                       | EC number | Biochemical reaction                                                                                                    | Annotation method |
|----------------|-------------------------------------------------------------------|-----------|-------------------------------------------------------------------------------------------------------------------------|-------------------|
| GAP            | Phosphatidylglycerol phosphate phosphatase                        | 3.1.3.27  | PGPm -> Plm + PGm                                                                                                       | NONE              |
| AO090701000187 | CDP-diacylglycerol-glycerol-3-phosphate 3-phosphatidyltransferase | 2.7.8.5   | CDPDGm + GL3Pm -> CMPm + CLm                                                                                            | BLASTP            |
| ZY135516       | CDP-diacylglycerol-glycerol-3-phosphate 3-phosphatidyltransferase | 2.7.8.5   | CDPDGm + GL3Pm -> CMPm + CLm                                                                                            | EST               |
| AO090020000334 | Ethanolaminephosphotransferase.                                   | 2.7.8.1   | CDPETN + DAGLY <-> CMP + PE                                                                                             | BLASTP            |
| AO090020000334 | Diacylglycerol cholinephosphotransferase                          | 2.7.8.2   | CDPCHO + DAGLY -> CMP + PC                                                                                              | BLASTP            |
| AO090005000648 | Diacylglycerol cholinephosphotransferase                          | 2.7.8.2   | CDPCHO + DAGLY -> CMP + PC                                                                                              | BLASTP            |
| AO090011000843 | 1-acylglycerol-3-phosphate acyltransferase                        | 2.3.1.51  | AGL3P + 0.5856 C160ACP + 0.0144 C161ACP + 0.0543 C180ACP + 0.4261 C181ACP + 1.9754 C182ACP + 0.0744 C183ACP -> PA + ACP | BLASTP            |
| AO090012000953 | Phosphatidate cytidyltransferase                                  | 2.7.7.41  | PA + CTP <-> CDPDG + PPI                                                                                                | BLASTP            |
| AO090023000648 | Phosphatidate cytidyltransferase                                  | 2.7.7.41  | PA + CTP <-> CDPDG + PPI                                                                                                | BLASTP            |
| AO090012000953 | Phosphatidate cytidyltransferase                                  | 2.7.7.41  | PAm + CTPm <-> CDPDGm + PPIIm                                                                                           | BLASTP            |
| AO090023000648 | Phosphatidate cytidyltransferase                                  | 2.7.7.41  | PAm + CTPm <-> CDPDGm + PPIIm                                                                                           | BLASTP            |
| AO090009000203 | Phosphatidylserine synthase                                       | 2.7.8.8   | CDPDG + SER <-> CMP + PS                                                                                                | BLASTP            |
| AO090009000203 | Phosphatidylserine synthase                                       | 2.7.8.8   | CDPDGm + SERm <-> CMPm + PSm                                                                                            | BLASTP            |
| AO090003001013 | Phosphatidylinositol synthase                                     | 2.7.8.11  | CDPDG + MYOI -> CMP + PINS                                                                                              | BLASTP            |
| AO090005001121 | Phosphatidylinositol synthase                                     | 2.7.8.11  | CDPDG + MYOI -> CMP + PINS                                                                                              | BLASTP            |
| AO090005001124 | Phosphatidylserine decarboxylase                                  | 4.1.1.65  | PS -> PE + CO2                                                                                                          | BLASTP            |
| AO090012000733 | Phosphatidylserine decarboxylase                                  | 4.1.1.65  | PS -> PE + CO2                                                                                                          | BLASTP            |
| AO090005001124 | Phosphatidylserine decarboxylase                                  | 4.1.1.65  | PSm -> PEm + CO2m                                                                                                       | BLASTP            |
| AO090012000733 | Phosphatidylserine decarboxylase                                  | 4.1.1.65  | PSm -> PEm + CO2m                                                                                                       | BLASTP            |
| ZY110723       | Phosphatidylserine decarboxylase                                  | 4.1.1.65  | PS -> PE + CO2                                                                                                          | EST               |
| AO090012000690 | Acylglycerone-phosphate reductase                                 | 1.1.1.101 | AT3P2 + NADPH -> AGL3P + NADP                                                                                           | BLASTP            |
| AO090001000150 | Acylglycerone-phosphate reductase                                 | 1.1.1.101 | AT3P2 + NADPH -> AGL3P + NADP                                                                                           | BLASTP            |
| AO090011000608 | Phosphatidylinositol 3-kinase                                     | 2.7.1.137 | ATP + PINS -> ADP + PINSP                                                                                               | GFAOP             |
| AO090120000393 | Phosphatidylinositol 3-kinase                                     | 2.7.1.137 | ATP + PINS -> ADP + PINSP                                                                                               | GFAOP             |
| AO090206000006 | Phosphatidylinositol 3-kinase                                     | 2.7.1.137 | ATP + PINS -> ADP + PINSP                                                                                               | GFAOP             |
| AO090020000426 | Phosphatidylinositol 3-kinase                                     | 2.7.1.137 | ATP + PINS -> ADP + PINSP                                                                                               | GFAOP             |

| Gene name      | Enzyme name                                            | EC number        | Biochemical reaction                                                                                            | Annotation method |
|----------------|--------------------------------------------------------|------------------|-----------------------------------------------------------------------------------------------------------------|-------------------|
| ZY006430       | Phosphatidylinositol-3,4,5-trisphosphate 3-phosphatase | 3.1.3.67         | PINSP + H2O -> D45PI + PI                                                                                       | EST               |
| AO090026000314 | Phosphatidylinositol 4-kinase                          | 2.7.1.67         | ATP + PINS -> ADP + PINS4P                                                                                      | BLASTP            |
| AO090026000840 | Phosphatidylinositol 4-kinase                          | 2.7.1.67         | ATP + PINS -> ADP + PINS4P                                                                                      | BLASTP            |
| AO090020000081 | Phosphatidylinositol-4-phosphate 5-kinase              | 2.7.1.68         | PINS4P + ATP -> D45PI + ADP                                                                                     | BLASTP            |
| AO090012000557 | Phosphoinositide phospholipase C                       | 3.1.4.11         | D45PI -> TPI + DAGLY                                                                                            | BLASTP            |
| AO090005001493 | Phosphoinositide phospholipase C                       | 3.1.4.11         | D45PI -> TPI + DAGLY                                                                                            | BLASTP            |
| AO090005001492 | Phosphoinositide phospholipase C                       | 3.1.4.11         | D45PI -> TPI + DAGLY                                                                                            | BLASTP            |
| AO090003000530 | Phosphoinositide phospholipase C                       | 3.1.4.11         | D45PI -> TPI + DAGLY                                                                                            | BLASTP            |
| AO090012000277 | Phospholipase A                                        | 3.1.1.4/3.1.1.32 | PC -> LPC + 0.5856 C160ACP + 0.0144 C161ACP + 0.0543 C180ACP + 0.4261 C181ACP + 1.9754 C182ACP + 0.0744 C183ACP | BLASTP            |
| AO090012000277 | Phospholipase A                                        | 3.1.1.4/3.1.1.32 | PE -> LPE + 0.5856 C160ACP + 0.0144 C161ACP + 0.0543 C180ACP + 0.4261 C181ACP + 1.9754 C182ACP + 0.0744 C183ACP | BLASTP            |
| AO090005000433 | Phospholipase D                                        | 3.1.4.4          | PC + H2O -> CHO + PA                                                                                            | BLASTP            |
| AO090102000204 | Phospholipase D                                        | 3.1.4.4          | PC + H2O -> CHO + PA                                                                                            | BLASTP            |
| AO090020000034 | Phospholipase D                                        | 3.1.4.4          | PC + H2O -> CHO + PA                                                                                            | BLASTP            |
| ZY111104       | Phospholipase D                                        | 3.1.4.4          | PC + H2O -> CHO + PA                                                                                            | EST               |
| AO090012000680 | Lysophospholipase                                      | 3.1.1.5          | LPC + H2O -> GLYCEROCHO + CARBO                                                                                 | BLASTP            |
| AO090023000685 | Lysophospholipase                                      | 3.1.1.5          | LPC + H2O -> GLYCEROCHO + CARBO                                                                                 | BLASTP            |
| AO090120000172 | Lysophospholipase                                      | 3.1.1.5          | LPC + H2O -> GLYCEROCHO + CARBO                                                                                 | BLASTP            |
| AO090701000473 | Lysophospholipase                                      | 3.1.1.5          | LPC + H2O -> GLYCEROCHO + CARBO                                                                                 | BLASTP            |
| AO090701000473 | Lysophospholipase                                      | 3.1.1.5          | LPC + H2O -> GLYCEROCHO + CARBO                                                                                 | BLASTP            |
| AO090012000680 | Lysophospholipase                                      | 3.1.1.5          | LPC + H2O -> GLYCEROCHO + CARBO                                                                                 | BLASTP            |
| AO090023000685 | Lysophospholipase                                      | 3.1.1.5          | LPC + H2O -> GLYCEROCHO + CARBO                                                                                 | BLASTP            |
| AO090102000492 | Lysophospholipase                                      | 3.1.1.5          | LPC + H2O -> GLYCEROCHO + CARBO                                                                                 | BLASTP            |
| AO090012000204 | Phosphatidylethanolamine N-methyltransferase           | 2.1.1.17         | SAM + PE -> SAH + PMME                                                                                          | BLASTP            |
| AO090005001620 | Phospholipid methyltransferase                         | 2.1.1.71         | SAM + PMME -> SAH + PDME                                                                                        | BLASTP            |
| AO090005001620 | Phospholipid methyltransferase                         | 2.1.1.71         | PDME + SAM -> PC + SAH                                                                                          | BLASTP            |

| Gene name                                                 | Enzyme name                             | EC number | Biochemical reaction               | Annotation method |
|-----------------------------------------------------------|-----------------------------------------|-----------|------------------------------------|-------------------|
| No_Gene                                                   | Chemical conversion                     | No_EC     | PA + NH4OH -> PAA + H2O            | BLASTP            |
| <b># Ethanolamine, choline, phosphocholine metabolism</b> |                                         |           |                                    |                   |
| GAP                                                       | Serine decarboxylase                    | 4.1.1.-   | SER -> ETHM + CO2                  | NONE              |
| AO090038000268                                            | Ethanolamine kinase                     | 2.7.1.82  | ATP + ETHM -> ADP + PETHM          | BLASTP            |
| AO090701000122                                            | Phosphoethanolamine N-methyltransferase | 2.1.1.103 | PETHM + 3 SAM -> PCHO + 3 SAH      | BLASTP            |
| AO090005001098                                            | Choline kinase                          | 2.7.1.32  | ATP + CHO -> ADP + PCHO            | BLASTP            |
| ZY029856                                                  | Choline kinase                          | 2.7.1.32  | ATP + CHO -> ADP + PCHO            | EST               |
| AO090005001594                                            | Cholinephosphate cytidylyltransferase   | 2.7.7.15  | PCHO + CTP -> CDPCHO + PPI         | BLASTP            |
| AO090023001003                                            | Phosphoethanolamine transferase         | 2.7.7.14  | PETHM + CTP -> CDPETN + PPI        | BLASTP            |
| <b># Sphingoglycolipid metabolism</b>                     |                                         |           |                                    |                   |
| AO090001000375                                            | Serine palmitoyltransferase             | 2.3.1.50  | C160COA + SER -> COA + DHSPH + CO2 | BLASTP            |
| AO090009000484                                            | Serine palmitoyltransferase             | 2.3.1.50  | C160COA + SER -> COA + DHSPH + CO2 | BLASTP            |
| AO090038000292                                            | 3-ketosphinganine reductase             | 1.1.1.102 | DHSPH + NADPH -> SPH + NADP        | BLASTP            |
| AO090038000306                                            | Sphinganine kinase                      | 2.7.1.91  | SPH + ATP -> DHSP + ADP            | BLASTP            |
| AO090038000306                                            | Sphinganine kinase                      | 2.7.1.91  | PSPH + ATP -> PHSP + ADP           | BLASTP            |
| AO090003001164                                            | Sphingosine-1-phosphate lyase           | 4.1.2.27  | DHSP -> PETHM + C16A               | BLASTP            |
| AO090010000721                                            | Sphingosine-1-phosphate lyase           | 4.1.2.27  | DHSP -> PETHM + C16A               | BLASTP            |
| AO090003001164                                            | Sphingosine-1-phosphate lyase           | 4.1.2.27  | PHSP -> PETHM + C16A               | BLASTP            |
| AO090010000721                                            | Sphingosine-1-phosphate lyase           | 4.1.2.27  | PHSP -> PETHM + C16A               | BLASTP            |
| AO090005000995                                            | Sphingolipid hydroxylase                | No_EC     | SPH + O2 + NADPH -> PSPH + NADP    | BLASTP            |
| AO090023000242                                            | Ceramide synthase                       | 2.3.1.24  | PSPH + ACOA -> CER2 + COA          | BLASTP            |
| AO090005001117                                            | Ceramide hydroxylase                    | No_EC     | CER2 + NADPH + O2 -> CER3 + NADP   | BLASTP            |
| AO090023000893                                            | Fatty acid desaturase                   | 1.14.-.-  | CER2 -> CER1                       | BLASTP            |
| AO090003000518                                            | MIP2C synthase                          | 2.4.1.-   | CER3 + PINS -> IPC                 | BLASTP            |
| AO090701000073                                            | MIPC synthase                           | 2.4.1.-   | IPC + GDPMAN -> MIPC               | BLASTP            |
| AO090005001189                                            | MIPC synthase                           | 2.4.1.-   | IPC + GDPMAN -> MIPC               | BLASTP            |
| AO090003000518                                            | MIP2C synthase                          | 2.4.1.-   | MIPC + PINS -> MIP2C               | BLASTP            |
| AO090113000120                                            | Sphingosine-1-phosphate phosphatase     | 3.1.3.-   | DHSP -> SPH + PI                   | BLASTP            |
| AO090020000582                                            | Ceramide glucosyltransferase            | 2.4.1.80  | UDPG + CER1 -> UDP + GCYLGR        | BLASTP            |
| AO090003000091                                            | Sphingomyelin phosphodiesterase         | 3.1.4.12  | SPMYLIN + H2O -> CER1 + PCHO       | BLASTP            |
| AO090701000789                                            | Sphingomyelin phosphodiesterase         | 3.1.4.12  | SPMYLIN + H2O -> CER1 + PCHO       | BLASTP            |



| Gene name                         | Enzyme name                      | EC number | Biochemical reaction                                                                                                       | Annotation method |
|-----------------------------------|----------------------------------|-----------|----------------------------------------------------------------------------------------------------------------------------|-------------------|
| AO090023000919                    | Sphingomyelin phosphodiesterase  | 3.1.4.12  | SPMYLIN + H2O -> CER1 + PCHO                                                                                               | BLASTP            |
| AO090120000416                    | Arylsulfatase                    | 3.1.6.1   | SUFT + H2O -> GACER + SLF                                                                                                  | BLASTP            |
| <b># Complex lipid metabolism</b> |                                  |           |                                                                                                                            |                   |
| <b># Glycerolipid Metabolism</b>  |                                  |           |                                                                                                                            |                   |
| AO090011000863                    | Diacylglycerol O-acyltransferase | 2.3.1.20  | DAGLY + 0.4710 C160ACP + 0.0242 C161ACP + 0.1535 C180ACP + 0.5328 C181ACP + 2.3362 C182ACP + 0.1499 C183ACP -> TAGLY + ACP | BLASTP            |
| AO090011000353                    | Triacylglycerol lipase           | 3.1.1.3   | TAGLY + H2O -> DAGLY + 0.4710 C160ACP + 0.0242 C161ACP + 0.1535 C180ACP + 0.5328 C181ACP + 2.3362 C182ACP + 0.1499 C183ACP | BLASTP            |
| AO090701000542                    | Triacylglycerol lipase           | 3.1.1.3   | TAGLY + H2O -> DAGLY + 0.4710 C160ACP + 0.0242 C161ACP + 0.1535 C180ACP + 0.5328 C181ACP + 2.3362 C182ACP + 0.1499 C183ACP | BLASTP            |
| AO090012000766                    | Triacylglycerol lipase           | 3.1.1.3   | TAGLY + H2O -> DAGLY + 0.4710 C160ACP + 0.0242 C161ACP + 0.1535 C180ACP + 0.5328 C181ACP + 2.3362 C182ACP + 0.1499 C183ACP | BLASTP            |
| AO090102000588                    | Triacylglycerol lipase           | 3.1.1.3   | TAGLY + H2O -> DAGLY + 0.4710 C160ACP + 0.0242 C161ACP + 0.1535 C180ACP + 0.5328 C181ACP + 2.3362 C182ACP + 0.1499 C183ACP | BLASTP            |
| AO090005000837                    | Triacylglycerol lipase           | 3.1.1.3   | TAGLY + H2O -> DAGLY + 0.4710 C160ACP + 0.0242 C161ACP + 0.1535 C180ACP + 0.5328 C181ACP + 2.3362 C182ACP + 0.1499 C183ACP | BLASTP            |
| AO090026000395                    | Triacylglycerol lipase           | 3.1.1.3   | TAGLY + H2O -> DAGLY + 0.4710 C160ACP + 0.0242 C161ACP + 0.1535 C180ACP + 0.5328 C181ACP + 2.3362 C182ACP + 0.1499 C183ACP | BLASTP            |

| Gene name      | Enzyme name            | EC number | Biochemical reaction                                                                                                             | Annotation method |
|----------------|------------------------|-----------|----------------------------------------------------------------------------------------------------------------------------------|-------------------|
| AO090120000164 | Triacylglycerol lipase | 3.1.1.3   | TAGLY + H2O -> DAGLY + 0.4710 C160ACP + 0.0242<br>C161ACP + 0.1535 C180ACP + 0.5328 C181ACP + 2.3362<br>C182ACP + 0.1499 C183ACP | BLASTP            |
| AO090003001432 | Triacylglycerol lipase | 3.1.1.3   | TAGLY + H2O -> DAGLY + 0.4710 C160ACP + 0.0242<br>C161ACP + 0.1535 C180ACP + 0.5328 C181ACP + 2.3362<br>C182ACP + 0.1499 C183ACP | BLASTP            |
| AO090103000036 | Triacylglycerol lipase | 3.1.1.3   | TAGLY + H2O -> DAGLY + 0.4710 C160ACP + 0.0242<br>C161ACP + 0.1535 C180ACP + 0.5328 C181ACP + 2.3362<br>C182ACP + 0.1499 C183ACP | BLASTP            |
| AO090001000143 | Triacylglycerol lipase | 3.1.1.3   | TAGLY + H2O -> DAGLY + 0.4710 C160ACP + 0.0242<br>C161ACP + 0.1535 C180ACP + 0.5328 C181ACP + 2.3362<br>C182ACP + 0.1499 C183ACP | BLASTP            |
| AO090701000644 | Triacylglycerol lipase | 3.1.1.3   | TAGLY + H2O -> DAGLY + 0.4710 C160ACP + 0.0242<br>C161ACP + 0.1535 C180ACP + 0.5328 C181ACP + 2.3362<br>C182ACP + 0.1499 C183ACP | BLASTP            |
| ZY080376       | Triacylglycerol lipase | 3.1.1.3   | TAGLY + H2O -> DAGLY + 0.4710 C160ACP + 0.0242<br>C161ACP + 0.1535 C180ACP + 0.5328 C181ACP + 2.3362<br>C182ACP + 0.1499 C183ACP | EST               |
| ZY111292       | Triacylglycerol lipase | 3.1.1.3   | TAGLY + H2O -> DAGLY + 0.4710 C160ACP + 0.0242<br>C161ACP + 0.1535 C180ACP + 0.5328 C181ACP + 2.3362<br>C182ACP + 0.1499 C183ACP | EST               |
| AO090011000353 | Triacylglycerol lipase | 3.1.1.3   | DAGLY + H2O -> MAGLY + 0.4710 C160ACP + 0.0242<br>C161ACP + 0.1535 C180ACP + 0.5328 C181ACP + 2.3362<br>C182ACP + 0.1499 C183ACP | BLASTP            |

| Gene name      | Enzyme name            | EC number | Biochemical reaction                                                                                                             | Annotation method |
|----------------|------------------------|-----------|----------------------------------------------------------------------------------------------------------------------------------|-------------------|
| AO090701000542 | Triacylglycerol lipase | 3.1.1.3   | DAGLY + H2O -> MAGLY + 0.4710 C160ACP + 0.0242<br>C161ACP + 0.1535 C180ACP + 0.5328 C181ACP + 2.3362<br>C182ACP + 0.1499 C183ACP | BLASTP            |
| AO090012000766 | Triacylglycerol lipase | 3.1.1.3   | DAGLY + H2O -> MAGLY + 0.4710 C160ACP + 0.0242<br>C161ACP + 0.1535 C180ACP + 0.5328 C181ACP + 2.3362<br>C182ACP + 0.1499 C183ACP | BLASTP            |
| AO090102000588 | Triacylglycerol lipase | 3.1.1.3   | DAGLY + H2O -> MAGLY + 0.4710 C160ACP + 0.0242<br>C161ACP + 0.1535 C180ACP + 0.5328 C181ACP + 2.3362<br>C182ACP + 0.1499 C183ACP | BLASTP            |
| AO090005000837 | Triacylglycerol lipase | 3.1.1.3   | DAGLY + H2O -> MAGLY + 0.4710 C160ACP + 0.0242<br>C161ACP + 0.1535 C180ACP + 0.5328 C181ACP + 2.3362<br>C182ACP + 0.1499 C183ACP | BLASTP            |
| AO090026000395 | Triacylglycerol lipase | 3.1.1.3   | DAGLY + H2O -> MAGLY + 0.4710 C160ACP + 0.0242<br>C161ACP + 0.1535 C180ACP + 0.5328 C181ACP + 2.3362<br>C182ACP + 0.1499 C183ACP | BLASTP            |
| AO090120000164 | Triacylglycerol lipase | 3.1.1.3   | DAGLY + H2O -> MAGLY + 0.4710 C160ACP + 0.0242<br>C161ACP + 0.1535 C180ACP + 0.5328 C181ACP + 2.3362<br>C182ACP + 0.1499 C183ACP | BLASTP            |
| AO090003001432 | Triacylglycerol lipase | 3.1.1.3   | DAGLY + H2O -> MAGLY + 0.4710 C160ACP + 0.0242<br>C161ACP + 0.1535 C180ACP + 0.5328 C181ACP + 2.3362<br>C182ACP + 0.1499 C183ACP | BLASTP            |
| AO090103000036 | Triacylglycerol lipase | 3.1.1.3   | DAGLY + H2O -> MAGLY + 0.4710 C160ACP + 0.0242<br>C161ACP + 0.1535 C180ACP + 0.5328 C181ACP + 2.3362<br>C182ACP + 0.1499 C183ACP | BLASTP            |

| Gene name      | Enzyme name                                                    | EC number | Biochemical reaction                                                                                                       | Annotation method |
|----------------|----------------------------------------------------------------|-----------|----------------------------------------------------------------------------------------------------------------------------|-------------------|
| AO090001000143 | Triacylglycerol lipase                                         | 3.1.1.3   | DAGLY + H2O -> MAGLY + 0.4710 C160ACP + 0.0242 C161ACP + 0.1535 C180ACP + 0.5328 C181ACP + 2.3362 C182ACP + 0.1499 C183ACP | BLASTP            |
| AO090701000644 | Triacylglycerol lipase                                         | 3.1.1.3   | DAGLY + H2O -> MAGLY + 0.4710 C160ACP + 0.0242 C161ACP + 0.1535 C180ACP + 0.5328 C181ACP + 2.3362 C182ACP + 0.1499 C183ACP | BLASTP            |
| ZY080376       | Triacylglycerol lipase                                         | 3.1.1.3   | DAGLY + H2O -> MAGLY + 0.4710 C160ACP + 0.0242 C161ACP + 0.1535 C180ACP + 0.5328 C181ACP + 2.3362 C182ACP + 0.1499 C183ACP | EST               |
| ZY111292       | Triacylglycerol lipase                                         | 3.1.1.3   | DAGLY + H2O -> MAGLY + 0.4710 C160ACP + 0.0242 C161ACP + 0.1535 C180ACP + 0.5328 C181ACP + 2.3362 C182ACP + 0.1499 C183ACP | EST               |
| GAP            | UDPgalactose:1,2-diacylglycerol 3-beta-D-galactosyltransferase | 2.4.1.46  | UDPGAL + DAGLY <-> UDP + MGDG                                                                                              | NONE              |
| GAP            | Galactolipid galactosyltransferase                             | 2.4.1.184 | UDPGAL + MGDG <-> UDP + DGDG                                                                                               | NONE              |
| AO090003000514 | Phospholipid:diacylglycerol acyltransferase                    | 2.3.1.158 | PC + DAGLY -> LPC + TAGLY                                                                                                  | BLASTP            |
| AO090003000514 | Phospholipid:diacylglycerol acyltransferase                    | 2.3.1.158 | PE + DAGLY -> LPE + TAGLY                                                                                                  | BLASTP            |
| AO090003000514 | Phospholipid:diacylglycerol acyltransferase                    | 2.3.1.158 | PAA + DAGLY -> LPAA + TAGLY                                                                                                | BLASTP            |
| AO090003000514 | Phospholipid:diacylglycerol acyltransferase                    | 2.3.1.158 | PS + DAGLY -> LPS + TAGLY                                                                                                  | BLASTP            |
| AO090003000514 | Phospholipid:diacylglycerol acyltransferase                    | 2.3.1.158 | PDME + DAGLY -> LPDME + TAGLY                                                                                              | BLASTP            |
| AO090003000514 | Phospholipid:diacylglycerol acyltransferase                    | 2.3.1.158 | PMME + DAGLY -> LPMME + TAGLY                                                                                              | BLASTP            |
| AO090003000514 | Phospholipid:diacylglycerol acyltransferase                    | 2.3.1.158 | PG + DAGLY -> LPG + TAGLY                                                                                                  | BLASTP            |
| AO090005001097 | phospholipase C                                                | 3.1.4.3   | PC -> DAGLY + PCHO                                                                                                         | BLASTP            |
| AO090103000073 | phospholipase C                                                | 3.1.4.3   | PC -> DAGLY + PCHO                                                                                                         | BLASTP            |
| AO090005001097 | phospholipase C                                                | 3.1.4.3   | PE -> DAGLY + PETHM                                                                                                        | BLASTP            |
| AO090103000073 | phospholipase C                                                | 3.1.4.3   | PE -> DAGLY + PETHM                                                                                                        | BLASTP            |

| Gene name                    | Enzyme name                                         | EC number | Biochemical reaction                     | Annotation method |
|------------------------------|-----------------------------------------------------|-----------|------------------------------------------|-------------------|
| <b># 6. Cofactor Pathway</b> |                                                     |           |                                          |                   |
| <b># Folate biosynthesis</b> |                                                     |           |                                          |                   |
| AO090005000616               | Methylenetetrahydrofolate dehydrogenase (NAD)       | 1.5.1.15  | METTHF + NAD -> METHF + NADH             | BLASTP            |
| AO090009000139               | Methylenetetrahydrofolate dehydrogenase (NAD)       | 1.5.1.15  | METTHF + NAD -> METHF + NADH             | BLASTP            |
| AO090005001405               | Methylenetetrahydrofolate dehydrogenase (NADP)      | 1.5.1.5   | METTHFm + NADPm -> METHFm + NADPHm       | BLASTP            |
| AO090026000520               | Methylenetetrahydrofolate reductase                 | 1.5.1.20  | METTHFm + NADPHm -> MTHFm + NADPm        | BLASTP            |
| AO090102000557               | Methylenetetrahydrofolate reductase                 | 1.5.1.20  | METTHFm + NADPHm -> MTHFm + NADPm        | BLASTP            |
| AO090005001405               | Methenyltetrahydrofolate cyclohydrolase             | 3.5.4.9   | FTHFm -> METHFm + H2O                    | BLASTP            |
| AO090005001405               | Formate-dihydrofolate ligase                        | 6.3.4.3   | ATPm + FORM + THFm -> ADPm + PIm + FTHFm | BLASTP            |
| AO090005000463               | 5-formyltetrahydrofolate cyclo-ligase               | 6.3.3.2   | ATPm + FTHFm -> ADPm + PIm + MTHFm       | GFAOP             |
| AO090005000463               | 5-formyltetrahydrofolate cyclo-ligase               | 6.3.3.2   | ATP + FTHF -> ADP + PI + MTHF            | BLASTP            |
| AO090023000763               | Folylpolyglutamate synthetase                       | 6.3.2.17  | THF + ATP + GLU <-> ADP + PI + THFG      | BLASTP            |
| AO090023000912               | Folylpolyglutamate synthetase                       | 6.3.2.17  | THF + ATP + GLU <-> ADP + PI + THFG      | BLASTP            |
| AO090009000308               | Folylpolyglutamate synthetase                       | 6.3.2.17  | THF + ATP + GLU <-> ADP + PI + THFG      | BLASTP            |
| AO090001000235               | GTP cyclohydrolase I                                | 3.5.4.16  | GTP -> FOR + AHTD                        | GFAOP             |
| AO090102000517               | GTP cyclohydrolase I                                | 3.5.4.16  | GTP -> FOR + AHTD                        | GFAOP             |
| AO090012000725               | Alkaline phosphatase                                | 3.1.3.1   | AHTD -> DHP + 3 PI                       | BLASTP            |
| AO090120000280               | Alkaline phosphatase                                | 3.1.3.1   | AHTD -> DHP + 3 PI                       | BLASTP            |
| AO090023000621               | Alkaline phosphatase                                | 3.1.3.1   | AHTD -> DHP + 3 PI                       | BLASTP            |
| AO090005000279               | Alkaline phosphatase                                | 3.1.3.1   | AHTD -> DHP + 3 PI                       | BLASTP            |
| AO090011000651               | Dihydroneopterin aldolase                           | 4.1.2.25  | DHP -> AHHMP + GLAL                      | BLASTP            |
| AO090011000651               | 6-Hydroxymethyl-7,8 dihydropterin pyrophosphokinase | 2.7.6.3   | AHHMP + ATP -> AMP + AHHMD               | BLASTP            |
| AO090011000651               | Dihydropteroate synthase                            | 2.5.1.15  | PABA + AHHMD -> PPI + DHPT               | BLASTP            |
| AO090011000651               | Dihydropteroate synthase                            | 2.5.1.15  | PABA + AHHMP -> DHPT                     | BLASTP            |
| AO090023000912               | Dihydrofolate synthase                              | 6.3.2.12  | DHPT + ATP + GLU -> ADP + PI + DHF       | BLASTP            |
| AO090011000807               | Dihydrofolate reductase                             | 1.5.1.3   | DHFm + NADPHm -> NADPm + THFm            | BLASTP            |
| AO090020000337               | Dihydrofolate reductase                             | 1.5.1.3   | DHF + NADPH -> NADP + THF                | BLASTP            |
| AO090701000057               | Para-aminobenzoate synthase                         | 6.3.5.8   | CHOR + GLN -> ADCHOR + GLU               | BLASTP            |
| GAP                          | Aminodeoxychorismate lyase                          | 4.1.3.38  | ADCHOR -> PYR + PABA                     | NONE              |

| Gene name                                         | Enzyme name                                      | EC number | Biochemical reaction                                                            | Annotation method |
|---------------------------------------------------|--------------------------------------------------|-----------|---------------------------------------------------------------------------------|-------------------|
| AO090023000412                                    | Formyltetrahydrofolate deformylase               | 3.5.1.10  | FTHF + H2O -> FOR + THF                                                         | BLASTP            |
| AO090003000074                                    | Methionyl-tRNA formyltransferase                 | 2.1.2.9   | FTHFm + LMETTRNA <sub>m</sub> + H2O <sub>m</sub> -> THFm + FOFMET <sub>m</sub>  | BLASTP            |
| AO090003000793                                    | Methionyl-tRNA formyltransferase                 | 2.1.2.9   | FTHFm + LMETTRNA <sub>m</sub> + H2O <sub>m</sub> -> THFm + FOFMET <sub>m</sub>  | BLASTP            |
| AO090011000915                                    | Glycine hydroxymethyltransferase                 | 2.1.2.1   | THFm + SER <sub>m</sub> <-> GLY <sub>m</sub> + METTHF <sub>m</sub>              | BLASTP            |
| AO090005001302                                    | Glycine hydroxymethyltransferase                 | 2.1.2.1   | THF + SER <-> GLY + METTHF                                                      | BLASTP            |
| AO090011000544                                    | Glycinamide ribotide transformylase              | 2.1.2.2   | GAR + FTHF -> THF + FGAR                                                        | GFAOP             |
| <b># Coenzyme A and pantothenate biosynthesis</b> |                                                  |           |                                                                                 |                   |
| AO090005000300                                    | 3-methyl-2-oxobutanoate hydroxymethyltransferase | 2.1.2.11  | OIVAL + METTHF -> AKP + THF                                                     | BLASTP            |
| AO090001000594                                    | 3-methyl-2-oxobutanoate hydroxymethyltransferase | 2.1.2.11  | OIVAL <sub>m</sub> + METTHF <sub>m</sub> -> AKP <sub>m</sub> + THF <sub>m</sub> | BLASTP            |
| AO090009000600                                    | 2-dehydropantoate 2-reductase                    | 1.1.1.169 | AKP + NADPH -> NADP + PANT                                                      | BLASTP            |
| AO090020000112                                    | 2-dehydropantoate 2-reductase                    | 1.1.1.169 | AKP + NADPH -> NADP + PANT                                                      | BLASTP            |
| AO090012000235                                    | 2-dehydropantoate 2-reductase                    | 1.1.1.169 | AKP + NADPH -> NADP + PANT                                                      | BLASTP            |
| AO090701000557                                    | Ketol-acid reductoisomerase                      | 1.1.1.169 | AKP <sub>m</sub> + NADPH <sub>m</sub> -> NADP <sub>m</sub> + PANT <sub>m</sub>  | BLASTP            |
| GAP                                               | Aspartate 1-decarboxylase                        | 4.1.1.11  | ASP -> CO2 + bALA                                                               | NONE              |
| AO090026000745                                    | Pantoate--beta-alanine ligase                    | 6.3.2.1   | PANT + bALA + ATP -> AMP + PPI + PNT0                                           | BLASTP            |
| AO090020000205                                    | Pantothenate kinase                              | 2.7.1.33  | PNT0 + ATP -> ADP + 4PPNT0                                                      | BLASTP            |
| AO090020000202                                    | Phosphopantothenate-cysteine ligase              | 6.3.2.5   | 4PPNT0 + CTP + CYS -> CMP + PPI + 4PPNCYS                                       | GFAOP             |
| AO090020000202                                    | Phosphopantothenoylcysteine decarboxylase        | 4.1.1.36  | 4PPNCYS -> CO2 + 4PPNTE                                                         | BLASTP            |
| GAP                                               | Pantetheine-phosphate adenylyltransferase        | 2.7.7.3   | 4PPNTE + ATP -> PPI + DPCOA                                                     | NONE              |
| AO090003001319                                    | Dephospho-CoA kinase                             | 2.7.1.24  | DPCOA + ATP -> ADP + COA                                                        | BLASTP            |
| AO090206000106                                    | 4'-phosphopantetheinyl transferase               | 2.7.8.7   | COA <sub>m</sub> -> PAP <sub>m</sub> + ACP <sub>m</sub>                         | GFAOP             |
| AO090206000106                                    | 4'-phosphopantetheinyl transferase               | 2.7.8.7   | COA -> PAP + ACP                                                                | BLASTP            |
| <b>#Thiamine Metabolism</b>                       |                                                  |           |                                                                                 |                   |
| GAP                                               | Thiamine biosynthesis protein (ThiC)             | No_EC     | AIR -> AHM                                                                      | NONE              |
| GAP                                               | Hydroxymethylpyrimidine kinase                   | 2.7.1.49  | AHM + ATP -> AHMP + ADP                                                         | NONE              |
| AO090011000561                                    | Phosphomethylpyrimidine kinase                   | 2.7.4.7   | AHMP + ATP -> AHMPP + ADP                                                       | BLASTP            |
| ZY087836                                          | Phosphomethylpyrimidine kinase                   | 2.7.4.7   | AHMP + ATP -> AHMPP + ADP                                                       | EST               |
| AO090011000799                                    | Hydroxyethylthiazole kinase                      | 2.7.1.50  | THZ + ATP -> THZP + ADP                                                         | BLASTP            |

| Gene name                                            | Enzyme name                                      | EC number | Biochemical reaction                             | Annotation method |
|------------------------------------------------------|--------------------------------------------------|-----------|--------------------------------------------------|-------------------|
| AO090011000799                                       | Thiamine-phosphate diphosphorylase               | 2.5.1.3   | THZP + AHMPP -> THMP + PPI                       | BLASTP            |
| GAP                                                  | Thiamine kinase                                  | 2.7.1.89  | ATP + THME -> ADP + THMP                         | NONE              |
| GAP                                                  | Thiamine-phosphate kinase                        | 2.7.4.16  | THMP + ATP <-> TPP + ADP                         | NONE              |
| AO090012000697                                       | Thiamine pyrophosphokinase                       | 2.7.6.2   | ATP + THME -> AMP + THDP                         | BLASTP            |
| AO090026000733                                       | Thiamine pyrophosphokinase                       | 2.7.6.2   | ATP + THME -> AMP + THDP                         | BLASTP            |
| <b># NAD AND NADP Conversion</b>                     |                                                  |           |                                                  |                   |
| AO090102000470/<br>AO090102000471/<br>AO090102000473 | Nicotinamide nucleotide transhydrogenase         | 1.6.1.2   | NADPHm + NADm <-> NADPm + NADHm                  | BLASTP            |
| AO090009000675                                       | NADH kinase                                      | 2.7.1.86  | NADHm + ATPm -> ADPm + NADPHm                    | BLASTP            |
| GAP                                                  | NAD nucleosidase                                 | 3.2.2.5   | NADm + H2Om -> ADPRIBm + NICDm                   | NONE              |
| AO090102000541                                       | NADH pyrophosphatase                             | 3.6.1.22  | NADm + H2Om -> AMPm + NMNm                       | BLASTP            |
| GAP                                                  | NMN nucleosidase                                 | 3.2.2.14  | NMNm + H2Om -> R5Pm + NICDm                      | NONE              |
| AO090001000095                                       | Nicotinamidase                                   | 3.5.1.19  | NICDm + H2Om -> NICNATEm + NH3m                  | BLASTP            |
| AO090003001400                                       | Nicotinamidase                                   | 3.5.1.19  | NICD + H2O -> NICNATE + NH3                      | BLASTP            |
| AO090005001244                                       | Nicotinamidase                                   | 3.5.1.19  | NICD + H2O -> NICNATE + NH3                      | BLASTP            |
| AO090001000561                                       | Nicotinamide mononucleotide adenylyl transferase | 2.7.7.1   | ATP + NICNUCLE -> PPI + DMNAD                    | BLASTP            |
| AO090102000540                                       | Glutamine dependent NAD synthetase               | 6.3.5.1   | ATP + DMNAD + GLN + H2O -> AMP + PPI + NAD + GLU | GFAOP             |
| No_Gene                                              | Spontaneous conversion                           | No_EC     | CMUSA -> H2O + QA                                | BLASTP            |
| AO090020000041                                       | Nicotinate-nucleotide pyrophosphorylase          | 2.4.2.19  | QA + PRPP -> NICNUCLE + PPI + CO2                | BLASTP            |
| AO090120000404                                       | NAD kinase                                       | 2.7.1.23  | ATP + NAD -> ADP + NADP                          | GFAOP             |
| AO090701000420                                       | NAD kinase                                       | 2.7.1.23  | ATP + NAD -> ADP + NADP                          | GFAOP             |
| AO090038000565                                       | Nicotinate phosphoribosyltransferase             | 2.4.2.11  | NICNATE + PRPP + H2O -> PPI + NICNUCLE           | BLASTP            |
| <b># Vitamin B6 Metabolism</b>                       |                                                  |           |                                                  |                   |
| AO090701000725                                       | Pyridoxal 5'-phosphate synthase                  | 4.-.-.    | RL5P -> T3P1 + PDXL5PI                           | BLASTP            |
| AO090005000781                                       | Pyridoxal kinase                                 | 2.7.1.35  | PDXAM + ATP -> PDXAM5PI + ADP                    | BLASTP            |
| AO090005000781                                       | Pyridoxal kinase                                 | 2.7.1.35  | PDXAL + ATP -> PDXL5PI + ADP                     | BLASTP            |
| AO090010000473                                       | Pyridoxamine phosphate oxidase                   | 1.4.3.5   | PDXAM5PI + H2O + O2 -> PDXL5PI + NH3 + H2O2      | BLASTP            |
| AO090020000331                                       | Pyridoxamine phosphate oxidase                   | 1.4.3.5   | PDXAM5PI + H2O + O2 -> PDXL5PI + NH3 + H2O2      | BLASTP            |

| Gene name                                   | Enzyme name                              | EC number | Biochemical reaction                                                                                  | Annotation method |
|---------------------------------------------|------------------------------------------|-----------|-------------------------------------------------------------------------------------------------------|-------------------|
| AO090005000781                              | Pyridoxal kinase                         | 2.7.1.35  | PDXI + ATP -> PDXI5PI + ADP                                                                           | BLASTP            |
| AO090010000473                              | Pyridoxamine phosphate oxidase           | 1.4.3.5   | PDXI5PI + H2O + O2 -> PDXL5PI + NH3 + H2O2                                                            | BLASTP            |
| AO090020000331                              | Pyridoxamine phosphate oxidase           | 1.4.3.5   | PDXI5PI + H2O + O2 -> PDXL5PI + NH3 + H2O2                                                            | BLASTP            |
| AO090010000473                              | Pyridoxamine phosphate oxidase           | 1.4.3.5   | PDXAL + H2O + O2 <-> PDXI + NH3 + H2O2                                                                | BLASTP            |
| AO090020000331                              | Pyridoxamine phosphate oxidase           | 1.4.3.5   | PDXAL + H2O + O2 <-> PDXI + NH3 + H2O2                                                                | BLASTP            |
| AO090010000473                              | Pyridoxamine phosphate oxidase           | 1.4.3.5   | PDXAL + H2O + O2 <-> PDXAM + NH3 + H2O2                                                               | BLASTP            |
| AO090020000331                              | Pyridoxamine phosphate oxidase           | 1.4.3.5   | PDXAL + H2O + O2 <-> PDXAM + NH3 + H2O2                                                               | BLASTP            |
| <b># Porphyrin and Chrophyll metabolism</b> |                                          |           |                                                                                                       |                   |
| GAP                                         | Glutamyl-tRNA reductase                  | 1.2.1.70  | LGLUTRNA + NADPH -> GLU1SAL + TRNA + NADP                                                             | NONE              |
| AO090020000375                              | Glutamate-1-semialdehyde 2,1-aminomutase | 5.4.3.8   | GLU1SAL -> AMIEVUL                                                                                    | BLASTP            |
| AO090009000630                              | 5-aminolevulinic acid synthase           | 2.3.1.37  | SUCCOAm + GLYm -> AMIEVULm + COAm + CO2m                                                              | BLASTP            |
| AO090005001652                              | Porphobilinogen synthase                 | 4.2.1.24  | 2 AMIEVUL -> PPBG + H2O                                                                               | BLASTP            |
| AO090120000294                              | Hydroxymethylbilane synthase             | 2.5.1.61  | 4 PPBG + H2O -> HMTB + 4 NH3                                                                          | BLASTP            |
| AO090012000205                              | Hydroxymethylbilane synthase             | 2.5.1.61  | 4 PPBG + H2O -> HMTB + 4 NH3                                                                          | BLASTP            |
| AO090103000151                              | Hydroxymethylbilane synthase             | 2.5.1.61  | 4 PPBG + H2O -> HMTB + 4 NH3                                                                          | BLASTP            |
| AO090003000401                              | Uroporphyrinogen-III synthase            | 4.2.1.75  | HMTB -> UPGIII + H2O                                                                                  | BLASTP            |
| AO090003000803                              | Uroporphyrinogen decarboxylase           | 4.1.1.37  | UPGIII -> CPGIII + 4 CO2                                                                              | BLASTP            |
| AO090012000998                              | Coproporphyrinogen III oxidase           | 1.3.3.3   | CPGIII <sub>m</sub> + O2 <sub>m</sub> -> PPGIX <sub>m</sub> + 2 CO2 <sub>m</sub> + 2 H2O <sub>m</sub> | BLASTP            |
| ZY087286                                    | Coproporphyrinogen III oxidase           | 1.3.3.3   | CPGIII <sub>m</sub> + O2 <sub>m</sub> -> PPGIX <sub>m</sub> + 2 CO2 <sub>m</sub> + 2 H2O <sub>m</sub> | EST               |
| AO090001000500                              | Protoporphyrinogen oxidase               | 1.3.3.4   | PPGIX <sub>m</sub> + O2 <sub>m</sub> -> PPRIX <sub>m</sub> + H2O <sub>m</sub>                         | BLASTP            |
| AO090012000855                              | Protoporphyrinogen oxidase               | 1.3.3.4   | PPGIX <sub>m</sub> + O2 <sub>m</sub> -> PPRIX <sub>m</sub> + H2O <sub>m</sub>                         | BLASTP            |
| AO090701000682                              | Ferrochelatase                           | 4.99.1.1  | PPRIX <sub>m</sub> -> PHEME <sub>m</sub>                                                              | BLASTP            |
| AO090023000725                              | Heme A farnesyltransferase               | 2.5.1.-   | PHEME <sub>m</sub> -> HEME_O <sub>m</sub>                                                             | BLASTP            |
| AO090003000180                              | cytochrome oxidase assembly factor COX15 | COX15     | HEME_O <sub>m</sub> -> HEME_A <sub>m</sub>                                                            | BLASTP            |
| AO090023000863                              | Cytochrome c1 heme lyase                 | 4.4.1.17  | PHEME <sub>m</sub> + APOCE <sub>m</sub> -> CYMEC <sub>m</sub>                                         | BLASTP            |
| AO090206000030                              | Cytochrome c1 heme lyase                 | 4.4.1.17  | PHEME <sub>m</sub> + APOCE <sub>m</sub> -> CYMEC <sub>m</sub>                                         | BLASTP            |
| AO090020000339                              | Uroporphyrin-III C-methyltransferase     | 2.1.1.107 | SAM + UPGIII -> SAH + PRECOR                                                                          | BLASTP            |
| AO090005000430                              | Precorrin-2 dehydrogenase                | 1.3.1.76  | PRECOR + NAD -> SHCR + NADH                                                                           | BLASTP            |
| AO090005000430                              | Sirohydrochlorin ferrochelatase          | 4.99.1.4  | SHCR -> SIHM                                                                                          | BLASTP            |



| Gene name                                   | Enzyme name                                                  | EC number | Biochemical reaction                    | Annotation method |
|---------------------------------------------|--------------------------------------------------------------|-----------|-----------------------------------------|-------------------|
| <b># Ubiquinone biosynthesis</b>            |                                                              |           |                                         |                   |
| GAP                                         | Chorismate pyruvate lyase                                    | 4.1.3.-   | CHOR -> 4HBZ + PYR                      | NONE              |
| AO090023001001                              | 4-hydroxybenzoate octaprenyltransferase                      | 2.5.1.-   | 4HBZ + NPP -> N4HBZ + PPI               | GFAOP             |
| AO090001000093                              | 3-octaprenyl-4-hydroxybenzoate carboxy-lyase                 | 4.1.1.-   | N4HBZ -> CO2 + 2NPPP                    | GFAOP             |
| AO090003000424                              | 3-octaprenyl-4-hydroxybenzoate carboxy-lyase                 | 4.1.1.-   | N4HBZ -> CO2 + 2NPPP                    | GFAOP             |
| AO090003000423                              | 3-octaprenyl-4-hydroxybenzoate carboxy-lyase                 | 4.1.1.-   | N4HBZ -> CO2 + 2NPPP                    | GFAOP             |
| GAP                                         | 2-octaprenylphenol hydroxylase                               | 1.13.14.- | 2NPPP + O2 -> 2N6H                      | NONE              |
| GAP                                         | 3-demethylubiquinone-9 3-O-methyltransferase                 | 2.1.1.64  | 2N6H + SAM -> 2NPMP + SAH               | NONE              |
| AO090009000294                              | 2-octaprenyl-6-methoxyphenol hydroxylase                     | 1.14.13.- | 2NPMPm + O2m -> 2NPMBm                  | NONE              |
| AO090001000559                              | Ubiquinone biosynthesis methyltransferase                    | 2.1.1.-   | 2NPMBm + SAMm -> 2NPMMBm + SAHm         | BLASTP            |
| AO090011000456                              | 2-octaprenyl-3-methyl-6-methoxy-1,4-benzoquinone hydroxylase | 1.14.13.- | 2NPMMBm + O2m -> 2NMHMBm                | NONE              |
| GAP                                         | 3-demethylubiquinone-9 3-O-methyltransferase                 | 2.1.1.64  | 2NMHMBm + SAMm -> Qm + SAHm             | NONE              |
| ZY080692                                    | P-hydroxybenzoate hydroxylase                                | 1.14.13.2 | 4HBZ + NADPH + O2 -> PCACE + NADP + H2O | EST               |
| <b># Riboflavin, FMN and FAD metabolism</b> |                                                              |           |                                         |                   |
| AO090012000551                              | GTP cyclohydrolase II                                        | 3.5.4.25  | GTP -> D6RP5P + FOR + PPI               | BLASTP            |
| AO090701000398                              | GTP cyclohydrolase II                                        | 3.5.4.25  | GTP -> D6RP5P + FOR + PPI               | BLASTP            |
| GAP                                         | Diaminohydroxyphosphoribosylaminopyrimidine deaminase        | 3.5.4.26  | D6RP5P -> A6RP5P + NH3                  | NONE              |
| AO090206000013                              | 5-amino-6-(5-phosphoribosylamino)uracil reductase            | 1.1.1.193 | A6RP5P + NADPH -> A6RP5P2 + NADP        | NONE              |
| GAP                                         | Pyrimidine phosphatase                                       | 3.1.3.-   | A6RP5P2 + H2O -> A6RP + PI              | NONE              |
| AO090003000439                              | 3,4-dihydroxy-2-butanone 4-phosphate synthase                | No_EC     | RL5P -> DB4P + FOR                      | NONE              |
| AO090003000004                              | 6,7-dimethyl-8-ribityllumazine synthase                      | No_EC     | DB4P + A6RP -> D8RL + PI + 2 H2O        | BLASTP            |
| AO090003000004                              | Riboflavin synthase                                          | 2.5.1.9   | D8RL -> A6RP + RIBFLAV                  | GFAOP             |
| AO090001000426                              | Riboflavin synthase                                          | 2.5.1.9   | D8RL -> A6RP + RIBFLAV                  | GFAOP             |
| AO090001000701                              | Riboflavin kinase                                            | 2.7.1.26  | RIBFLAV + ATP -> FMN + ADP              | BLASTP            |
| AO090023000516                              | FMN adenyltransferase                                        | 2.7.7.2   | FMN + ATP -> FAD + PPI                  | BLASTP            |
| AO090103000338                              | Acid phosphatase                                             | 3.1.3.2   | FMN -> RIBFLAV + PI                     | BLASTP            |
| AO090103000018                              | Acid phosphatase                                             | 3.1.3.2   | FMN -> RIBFLAV + PI                     | BLASTP            |
| AO090011000300                              | Acid phosphatase                                             | 3.1.3.2   | FMNe -> RIBFLAVe + Ple                  | BLASTP            |
| AO090011000115                              | Acid phosphatase                                             | 3.1.3.2   | FMNe -> RIBFLAVe + Ple                  | BLASTP            |

| Gene name                        | Enzyme name                                                  | EC number                               | Biochemical reaction                              | Annotation method |
|----------------------------------|--------------------------------------------------------------|-----------------------------------------|---------------------------------------------------|-------------------|
| AO090009000416                   | Acid phosphatase                                             | 3.1.3.2                                 | FMNe -> RIBFLAVe + Ple                            | BLASTP            |
| <b># Biotin Metabolism</b>       |                                                              |                                         |                                                   |                   |
| GAP                              | 6-carboxyhexanoate-CoA ligase                                | 6.2.1.14                                | ATP + 6CARHEX + COA -> AMP + PPI + CHCOA          | NONE              |
| AO090009000589                   | 8-amino-7-oxononanoate synthase                              | 2.3.1.47                                | CHCOA + ALA -> AONA + COA + CO2                   | BLASTP            |
| AO090038000549                   | 8-amino-7-oxononanoate synthase                              | 2.3.1.47                                | CHCOA + ALA -> AONA + COA + CO2                   | BLASTP            |
| AO090010000518                   | Adenosylmethionine-8-amino-7-oxononanoate transaminase       | 2.6.1.62                                | SAMm + AONAm -> SAMOBm + DANNAm                   | BLASTP            |
| AO090010000518                   | Adenosylmethionine-8-amino-7-oxononanoate transaminase       | 2.6.1.62                                | SAM + AONA -> SAMOB + DANNA                       | BLASTP            |
| AO090009000590                   | Dethiobiotin synthase                                        | 6.3.3.3                                 | CO2 + DANNA + ATP -> DTB + PI + ADP               | BLASTP            |
| AO090005001069                   | Biotin synthase                                              | 2.8.1.6                                 | DTB + 2 SAM + S -> BT + 2 MET + DA                | BLASTP            |
| AO090011000708                   | Biotin holocarboxylase synthetase/biotin-protein ligase      | 6.3.4.9/6.3.4.10/<br>6.3.4.11/ 6.3.4.15 | BT -> BTAMP                                       | BLASTP            |
| AO090011000708                   | Biotin holocarboxylase synthetase/biotin-protein ligase      | 6.3.4.9/6.3.4.10/<br>6.3.4.11/6.3.4.15  | BTAMP -> HCXY                                     | BLASTP            |
| <b># 7. Secondary metabolism</b> |                                                              |                                         |                                                   |                   |
| <b># Penicillin biosynthesis</b> |                                                              |                                         |                                                   |                   |
| AO090003000661                   | Phenylpyruvate decarboxylase                                 | 4.1.1.43                                | PHPYR <-> PHACAL + CO2                            | BLASTP            |
| AO090009000222                   | Aldehyde dehydrogenase (NADP)                                | 1.2.1.5                                 | PHACAL + NAD + H2O <-> PHAC + NADH                | BLASTP            |
| AO090011000620                   | Phenylacetyl-CoA ligase                                      | 6.2.1.30                                | ATP + PHAC + COA <-> AMP + PPI + PHAC-COA         | BLASTP            |
| AO090701000311                   | Phenylacetyl-CoA ligase                                      | 6.2.1.30                                | ATP + PHAC + COA <-> AMP + PPI + PHAC-COA         | BLASTP            |
| AO090001000200                   | Phenylacetyl-CoA ligase                                      | 6.2.1.30                                | ATP + PHAC + COA <-> AMP + PPI + PHAC-COA         | BLASTP            |
| AO090012000579                   | Phenylacetyl-CoA ligase                                      | 6.2.1.30                                | ATP + PHAC + COA <-> AMP + PPI + PHAC-COA         | BLASTP            |
| AO090102000062                   | Phenylacetyl-CoA ligase                                      | 6.2.1.12                                | ATP + PHAC + COA <-> AMP + PPI + PHAC-COA         | BLASTP            |
| AO090038000543                   | N-(5-Amino-5-carboxypentanoyl)-L-cysteinyl-D-valine synthase | 6.3.2.26                                | AMA + CYS + VAL + 3 ATP -> LLDACV + 3 AMP + 3 PPI | BLASTP            |
| AO090038000544                   | Isopenicillin-N synthase                                     | 1.21.3.1                                | LLDACV + O2 -> IPN + 2 H2O                        | BLASTP            |

| Gene name                                        | Enzyme name                                        | EC number | Biochemical reaction                  | Annotation method    |
|--------------------------------------------------|----------------------------------------------------|-----------|---------------------------------------|----------------------|
| AO090038000545                                   | Isopenicillin-N N-acyltransferase                  | 2.3.1.164 | IPN + PHAC-COA -> PEN + AMA + COA     | BLASTP               |
| AO090102000584                                   | Isopenicillin N-CoA epimerase                      | 5.1.1.17  | IPN -> PENN                           | BLASTP               |
| AO090005000338                                   | Beta-lactamase                                     | 3.5.2.6   | PEN -> PENACID                        | BLASTP               |
| AO090010000330                                   | Beta-lactamase                                     | 3.5.2.6   | PEN -> PENACID                        | BLASTP               |
| AO090010000427                                   | Beta-lactamase                                     | 3.5.2.6   | PEN -> PENACID                        | BLASTP               |
| AO090012000033                                   | Beta-lactamase                                     | 3.5.2.6   | PEN -> PENACID                        | BLASTP               |
| AO090701000879                                   | Beta-lactamase                                     | 3.5.2.6   | PEN -> PENACID                        | BLASTP               |
| <b># Sterigmatocystin/Aflatoxin biosynthesis</b> |                                                    |           |                                       |                      |
| AO090026000012                                   | Fatty acid synthase                                | No_EC     | ACCOA + 9 MALCOA + O2 -> NOR          | BLASTP, Gene Cluster |
| AO090026000013                                   | Fatty acid synthase                                | No_EC     | ACCOA + 9 MALCOA + O2 -> NOR          | BLASTP, Gene Cluster |
| AO090026000009                                   | Polyketide syntase                                 | No_EC     | ACCOA + 9 MALCOA + O2 -> NOR          | BLASTP, Gene Cluster |
| AO090026000011                                   | Norsolorinic acid reductase                        | 1.1.1.-   | NOR + NADPH -> NADP + AVN             | BLASTP, Gene Cluster |
| AO090026000018                                   | Norsolorinic acid reductase                        | 1.1.1.-   | NOR + NADPH -> NADP + AVN             | BLASTP, Gene Cluster |
| AO090026000010                                   | Norsolorinic acid reductase                        | 1.1.1.-   | NOR + NADPH -> NADP + AVN             | BLASTP, Gene Cluster |
| AO090026000021                                   | cytochrome P450 monooxygenase                      | 1.14.-.   | AVN + NADPH + O2 -> NADP + H2O + HAVN | BLASTP, Gene Cluster |
| ZY006677                                         | cytochrome P450 monooxygenase                      | 1.14.-.   | AVN + NADPH + O2 -> NADP + H2O + HAVN | EST                  |
| AO090026000030                                   | Sterigmatocystin biosynthesis monooxygenase        | 1.14.-.   | AVN + NADPH + O2 -> NADP + H2O + HAVN | BLASTP, Gene Cluster |
| AO090026000020                                   | Sterigmatocystin biosynthesis P450 monooxygenase   | 1.14.-.   | AVN + NADPH + O2 -> NADP + H2O + HAVN | BLASTP, Gene Cluster |
| AO090026000016                                   | Short-chain alcohol dehydrogenases                 | No_EC     | HAVN + SAM + NAD -> NADH + AVF        | BLASTP, Gene Cluster |
| AO090026000024                                   | Sterigmatocystin biosynthesis protein stcO         | No_EC     | AVF + O2 -> H2O + VHA                 | BLASTP, Gene Cluster |
| AO090026000017                                   | Sterigmatocystin biosynthesis lipase/esterase STCI | No_EC     | VHA + H2O -> SAM + VERAL              | BLASTP, Gene Cluster |
| AO090026000028                                   | Versicolorin B synthase                            | No_EC     | VERAL -> H2O + VERB                   | BLASTP, Gene Cluster |
| AO090026000029                                   | Sterigmatocystin biosynthesis P450 monooxygenase   | 1.14.-.   | VERB + NAD -> NADH + VERA             | BLASTP, Gene Cluster |
| AO090026000019                                   | 1,3,6,8-tetrahydroxynaphthalene reductase          | 1.1.-.    | VERA + NADPH -> NADP + H2O + DMST     | BLASTP               |
| AO090026000022                                   | Sterigmatocystin biosynthesis P450 monooxygenase   | 1.14.-.   | VERA + NADPH -> NADP + H2O + DMST     | BLASTP               |
| AO090026000019                                   | 1,3,6,8-tetrahydroxynaphthalene reductase          | 1.1.-.    | VERB + NADPH -> NADP + H2O + DHDMST   | BLASTP               |

| Gene name                       | Enzyme name                                      | EC number  | Biochemical reaction                      | Annotation method    |
|---------------------------------|--------------------------------------------------|------------|-------------------------------------------|----------------------|
| AO09002600022                   | Sterigmatocystin biosynthesis P450 monooxygenase | 1.14.-.-   | VERB + NADPH -> NADP + H2O + DHDMST       | BLASTP               |
| AO090001000024                  | Demethylsterigmatocystin 6-O-methyltransferase   | 2.1.1.109  | DMST + SAM -> SAH + ST                    | BLASTP               |
| AO090001000024                  | Demethylsterigmatocystin 6-O-methyltransferase   | 2.1.1.109  | DHDMST + SAM -> SAH + DHST                | BLASTP               |
| AO090026000026                  | Demethylsterigmatocystin 6-O-methyltransferase   | 2.1.1.110  | ST + SAM -> SAH + OMST                    | BLASTP, Gene Cluster |
| AO090026000025                  | Demethylsterigmatocystin 6-O-methyltransferase   | 2.1.1.110  | ST + SAM -> SAH + OMST                    | BLASTP, Gene Cluster |
| AO090026000026                  | Demethylsterigmatocystin 6-O-methyltransferase   | 2.1.1.110  | DHST + SAM -> SAH + DHOMST                | BLASTP, Gene Cluster |
| AO090026000025                  | Demethylsterigmatocystin 6-O-methyltransferase   | 2.1.1.110  | DHST + SAM -> SAH + DHOMST                | BLASTP, Gene Cluster |
| AO090026000027                  | O-Methylsterigmatocystin oxidoreductase          | 1.14.1.-   | OMST + NADPH + O2 -> NADP + H2O + AFB1    | BLASTP, Gene Cluster |
| AO090026000014                  | O-Methylsterigmatocystin oxidoreductase          | 1.14.1.-   | OMST + NADPH + O2 -> NADP + H2O + AFB1    | BLASTP, Gene Cluster |
| AO090026000015                  | O-Methylsterigmatocystin oxidoreductase          | 1.14.1.-   | OMST + NADPH + O2 -> NADP + H2O + AFB1    | BLASTP, Gene Cluster |
| AO090026000023                  | O-Methylsterigmatocystin oxidoreductase          | 1.14.1.-   | OMST + NADPH + O2 -> NADP + H2O + AFB1    | BLASTP, Gene Cluster |
| AO090005000070                  | O-Methylsterigmatocystin oxidoreductase          | 1.14.1.-   | OMST + NADPH + O2 -> NADP + H2O + AFB1    | BLASTP               |
| AO090026000027                  | O-Methylsterigmatocystin oxidoreductase          | 1.14.1.-   | OMST + NADPH + O2 -> NADP + H2O + AFG1    | BLASTP, Gene Cluster |
| AO090026000014                  | O-Methylsterigmatocystin oxidoreductase          | 1.14.1.-   | OMST + NADPH + O2 -> NADP + H2O + AFG1    | BLASTP, Gene Cluster |
| AO090026000015                  | O-Methylsterigmatocystin oxidoreductase          | 1.14.1.-   | OMST + NADPH + O2 -> NADP + H2O + AFG1    | BLASTP, Gene Cluster |
| AO090026000023                  | O-Methylsterigmatocystin oxidoreductase          | 1.14.1.-   | OMST + NADPH + O2 -> NADP + H2O + AFG1    | BLASTP, Gene Cluster |
| AO090005000070                  | O-Methylsterigmatocystin oxidoreductase          | 1.14.1.-   | OMST + NADPH + O2 -> NADP + H2O + AFG1    | BLASTP               |
| AO090026000027                  | O-Methylsterigmatocystin oxidoreductase          | 1.14.1.-   | DHOMST + NADPH + O2 -> NADP + H2O + AFB2  | BLASTP, Gene Cluster |
| AO090026000014                  | O-Methylsterigmatocystin oxidoreductase          | 1.14.1.-   | DHOMST + NADPH + O2 -> NADP + H2O + AFB2  | BLASTP, Gene Cluster |
| AO090026000015                  | O-Methylsterigmatocystin oxidoreductase          | 1.14.1.-   | DHOMST + NADPH + O2 -> NADP + H2O + AFB2  | BLASTP, Gene Cluster |
| AO090026000023                  | O-Methylsterigmatocystin oxidoreductase          | 1.14.1.-   | DHOMST + NADPH + O2 -> NADP + H2O + AFB2  | BLASTP, Gene Cluster |
| AO090005000070                  | O-Methylsterigmatocystin oxidoreductase          | 1.14.1.-   | DHOMST + NADPH + O2 -> NADP + H2O + AFB2  | BLASTP               |
| AO090026000027                  | O-Methylsterigmatocystin oxidoreductase          | 1.14.1.-   | DHOMST + NADPH + O2 -> NADP + H2O + AFG2  | BLASTP, Gene Cluster |
| AO090026000014                  | O-Methylsterigmatocystin oxidoreductase          | 1.14.1.-   | DHOMST + NADPH + O2 -> NADP + H2O + AFG2  | BLASTP, Gene Cluster |
| AO090026000015                  | O-Methylsterigmatocystin oxidoreductase          | 1.14.1.-   | DHOMST + NADPH + O2 -> NADP + H2O + AFG2  | BLASTP, Gene Cluster |
| AO090026000023                  | O-Methylsterigmatocystin oxidoreductase          | 1.14.1.-   | DHOMST + NADPH + O2 -> NADP + H2O + AFG2  | BLASTP, Gene Cluster |
| AO090005000070                  | O-Methylsterigmatocystin oxidoreductase          | 1.14.1.-   | DHOMST + NADPH + O2 -> NADP + H2O + AFG2  | BLASTP               |
| <b># Flavonoid Biosynthesis</b> |                                                  |            |                                           |                      |
| GAP                             | Cinnamate 4-hydroxylase                          | 1.14.13.11 | CINNAM + NADPH + O2 -> 4CMRE + H2O + NADP | NONE                 |
| AO090005000532                  | Phenylalanine ammonia-lyase                      | 4.3.1.5    | TYR -> NH3 + 4CMRE                        | BLASTP               |
| AO090011000788                  | Phenylalanine ammonia-lyase                      | 4.3.1.5    | TYR -> NH3 + 4CMRE                        | BLASTP               |

| Gene name                                 | Enzyme name                       | EC number  | Biochemical reaction                        | Annotation method |
|-------------------------------------------|-----------------------------------|------------|---------------------------------------------|-------------------|
| AO090701000601                            | Phenylalanine ammonia-lyase       | 4.3.1.5    | TYR -> NH3 + 4CMRE                          | BLASTP            |
| AO090026000586                            | Phenylalanine ammonia-lyase       | 4.3.1.5    | TYR -> NH3 + 4CMRE                          | BLASTP            |
| AO090102000033                            | 4-coumarate-CoA ligase            | 6.2.1.12   | 4CMRE + ATP + COA -> 4CMCOA + AMP + PPI     | BLASTP            |
| AO090102000165                            | 4-coumarate-CoA ligase            | 6.2.1.12   | 4CMRE + ATP + COA -> 4CMCOA + AMP + PPI     | BLASTP            |
| AO090120000376                            | 4-coumarate-CoA ligase            | 6.2.1.12   | 4CMRE + ATP + COA -> 4CMCOA + AMP + PPI     | BLASTP            |
| AO090124000040                            | Naringenin-chalcone synthase      | 2.3.1.74   | 4CMCOA + 3 MALCOA -> 4 COA + 3 CO2 + NCACE  | BLASTP            |
| AO090701000566                            | Naringenin-chalcone synthase      | 2.3.1.74   | 4CMCOA + 3 MALCOA -> 4 COA + 3 CO2 + NCACE  | BLASTP            |
| GAP                                       | Chalcone isomerase                | 5.5.1.6    | NCACE -> NGEN                               | NONE              |
| AO090005001560                            | Flavonoid 3'-monooxygenase        | 1.14.13.21 | NGEN + O2 + NADPH -> ERIDICOL + NADP + H2O  | BLASTP            |
| AO090166000121                            | 2'-hydroxyisoflavone reductase    | 1.3.1.45   | NGEN -> FERRIN                              | BLASTP            |
| AO090166000121                            | 2'-hydroxyisoflavone reductase    | 1.3.1.45   | NGEN -> VESTINE                             | BLASTP            |
| <b># Melanin biosynthesis</b>             |                                   |            |                                             |                   |
| AO090038000061                            | Tyrosinase                        | 1.14.18.1  | TYRe + DOPAE + O2e -> DOPAE + DOQUIe + H2Oe | GFAOP             |
| AO090001000383                            | Tyrosinase                        | 1.14.18.1  | TYRe + DOPAE + O2e -> DOPAE + DOQUIe + H2Oe | GFAOP             |
| AO090001000117                            | Tyrosinase                        | 1.14.18.1  | TYRe + DOPAE + O2e -> DOPAE + DOQUIe + H2Oe | GFAOP             |
| AO090026000145                            | Tyrosinase                        | 1.14.18.1  | TYRe + DOPAE + O2e -> DOPAE + DOQUIe + H2Oe | GFAOP             |
| AO090012000590                            | Tyrosinase                        | 1.14.18.1  | TYR + DOPA + O2 -> DOPA + DOQUI + H2O       | GFAOP             |
| AO090023000424                            | Tyrosinase                        | 1.14.18.1  | TYR + DOPA + O2 -> DOPA + DOQUI + H2O       | GFAOP             |
| AO090010000557                            | Tyrosinase                        | 1.14.18.1  | TYR + DOPA + O2 -> DOPA + DOQUI + H2O       | GFAOP             |
| AO090026000145                            | Tyrosinase                        | 1.14.18.1  | TYR + DOPA + O2 -> DOPA + DOQUI + H2O       | GFAOP             |
| AO090701000859                            | Tyrosinase                        | 1.14.18.1  | TYR + DOPA + O2 -> DOPA + DOQUI + H2O       | GFAOP             |
| AO090113000032                            | Tyrosinase                        | 1.14.18.1  | TYR + DOPA + O2 -> DOPA + DOQUI + H2O       | GFAOP             |
| No_Gene                                   | Spontaneous conversion            | No_EC      | DOQUI -> DIHINDOLE                          | NONE              |
| No_Gene                                   | Oxidation reaction                | No_EC      | DIHINDOLE -> MENIN                          | NONE              |
| <b># Pentaketide melanin biosynthesis</b> |                                   |            |                                             |                   |
| GAP                                       | Heptaketide synthase              | No_EC      | ACCOA + MALCOA -> 1368THN                   | NONE              |
| GAP                                       | Tetrahydroxynaphthalene reductase | 1.1.1.252  | 1368THN + NADPH -> SCTLE + NADP             | NONE              |
| ZY111007                                  | Scytalone dehydratase             | 4.2.1.94   | SCTLE -> 138THN                             | EST               |
| GAP                                       | Tetrahydroxynaphthalene reductase | 1.1.1.252  | 138THN + NADPH -> VEMML + NADP              | NONE              |
| GAP                                       | Dehydration and reduction         | No_EC      | VEMML -> 18DHN                              | NONE              |
| GAP                                       | Polymerization reaction           | No_EC      | 18DHN -> MENIN                              | NONE              |

| Gene name                          | Enzyme name                         | EC number | Biochemical reaction | Annotation method |
|------------------------------------|-------------------------------------|-----------|----------------------|-------------------|
| <b># Transport reaction</b>        |                                     |           |                      |                   |
| <b># Plasma membrane transport</b> |                                     |           |                      |                   |
| <b># Carbohydrates</b>             |                                     |           |                      |                   |
| PMT_DGLC                           | D-Glucose plasma membrane transport | No_EC     | DGLCe -> DGLC        | NONE              |
| AO090020000259                     | MFS monosaccharide transporter      | No_EC     | GLCe -> GLC          | BLASTP            |
| AO090026000494                     | MFS monosaccharide transporter      | No_EC     | GLCe -> GLC          | BLASTP            |
| AO090010000126                     | MFS monosaccharide transporter      | No_EC     | GLCe -> GLC          | BLASTP            |
| AO090020000696                     | MFS monosaccharide transporter      | No_EC     | GLCe -> GLC          | BLASTP            |
| AO090038000167                     | MFS monosaccharide transporter      | No_EC     | GLCe -> GLC          | BLASTP            |
| AO090102000255                     | MFS monosaccharide transporter      | No_EC     | GLCe -> GLC          | BLASTP            |
| AO090010000470                     | MFS monosaccharide transporter      | No_EC     | GLCe -> GLC          | BLASTP            |
| AO090020000259                     | MFS monosaccharide transporter      | No_EC     | bDGLCe -> bDGLC      | BLASTP            |
| AO090026000494                     | MFS monosaccharide transporter      | No_EC     | bDGLCe -> bDGLC      | BLASTP            |
| AO090010000126                     | MFS monosaccharide transporter      | No_EC     | bDGLCe -> bDGLC      | BLASTP            |
| AO090020000696                     | MFS monosaccharide transporter      | No_EC     | bDGLCe -> bDGLC      | BLASTP            |
| AO090038000167                     | MFS monosaccharide transporter      | No_EC     | bDGLCe -> bDGLC      | BLASTP            |
| AO090102000255                     | MFS monosaccharide transporter      | No_EC     | bDGLCe -> bDGLC      | BLASTP            |
| AO090010000470                     | MFS monosaccharide transporter      | No_EC     | bDGLCe -> bDGLC      | BLASTP            |
| AO090020000259                     | MFS monosaccharide transporter      | No_EC     | GLACe -> GLAC        | BLASTP            |
| AO090026000494                     | MFS monosaccharide transporter      | No_EC     | GLACe -> GLAC        | BLASTP            |
| AO090010000126                     | MFS monosaccharide transporter      | No_EC     | GLACe -> GLAC        | BLASTP            |
| AO090020000696                     | MFS monosaccharide transporter      | No_EC     | GLACe -> GLAC        | BLASTP            |
| AO090038000167                     | MFS monosaccharide transporter      | No_EC     | GLACe -> GLAC        | BLASTP            |
| AO090102000255                     | MFS monosaccharide transporter      | No_EC     | GLACe -> GLAC        | BLASTP            |
| AO090010000470                     | MFS monosaccharide transporter      | No_EC     | GLACe -> GLAC        | BLASTP            |
| AO090020000259                     | MFS monosaccharide transporter      | No_EC     | FRUe -> FRU          | BLASTP            |
| AO090026000494                     | MFS monosaccharide transporter      | No_EC     | FRUe -> FRU          | BLASTP            |
| AO090010000126                     | MFS monosaccharide transporter      | No_EC     | FRUe -> FRU          | BLASTP            |
| AO090020000696                     | MFS monosaccharide transporter      | No_EC     | FRUe -> FRU          | BLASTP            |
| AO090038000167                     | MFS monosaccharide transporter      | No_EC     | FRUe -> FRU          | BLASTP            |
| AO090102000255                     | MFS monosaccharide transporter      | No_EC     | FRUe -> FRU          | BLASTP            |

| Gene name      | Enzyme name                                   | EC number | Biochemical reaction | Annotation method |
|----------------|-----------------------------------------------|-----------|----------------------|-------------------|
| AO090010000470 | MFS monosaccharide transporter                | No_EC     | FRUe -> FRU          | BLASTP            |
| AO090020000259 | MFS monosaccharide transporter                | No_EC     | MANe -> MAN          | BLASTP            |
| AO090026000494 | MFS monosaccharide transporter                | No_EC     | MANe -> MAN          | BLASTP            |
| AO090010000126 | MFS monosaccharide transporter                | No_EC     | MANe -> MAN          | BLASTP            |
| AO090020000696 | MFS monosaccharide transporter                | No_EC     | MANe -> MAN          | BLASTP            |
| AO090038000167 | MFS monosaccharide transporter                | No_EC     | MANe -> MAN          | BLASTP            |
| AO090102000255 | MFS monosaccharide transporter                | No_EC     | MANe -> MAN          | BLASTP            |
| AO090010000470 | MFS monosaccharide transporter                | No_EC     | MANe -> MAN          | BLASTP            |
| AO090038000233 | Maltose permease                              | No_EC     | MLTe -> MLT          | BLASTP            |
| AO090103000130 | Maltose permease                              | No_EC     | MLTe -> MLT          | BLASTP            |
| AO090011000538 | Maltose permease                              | No_EC     | MLTe -> MLT          | BLASTP            |
| AO090120000021 | Myo-inositol transporter                      | No_EC     | MYOIe -> MYOI        | BLASTP            |
| AO090023000988 | Myo-inositol transporter                      | No_EC     | MYOIe -> MYOI        | BLASTP            |
| PMT_MELI       | Melibiose plasma membrane transport           | No_EC     | MELIe -> MELI        | NONE              |
| PMT_TRE        | Trehalose plasma membrane transport           | No_EC     | TREe <-> TRE         | NONE              |
| PMT_RIB        | Ribose plasma membrane transport              | No_EC     | RIBe -> RIB          | NONE              |
| PMT_MNT        | Mannitol plasma membrane transport            | No_EC     | MNTe <-> MNT         | NONE              |
| PMT_SOT        | Sorbitol plasma membrane transport            | No_EC     | SOTe <-> SOT         | NONE              |
| PMT_NAG        | N-acetylglucosamine plasma membrane transport | No_EC     | NAGe -> NAG          | NONE              |
| PMT_SOR        | Sorbose plasma membrane transport             | No_EC     | SORe -> SOR          | NONE              |
| PMT_ARAB       | Arabinose plasma membrane transport           | No_EC     | ARABe -> ARAB        | NONE              |
| PMT_LARAB      | L-arabinose plasma membrane transport         | No_EC     | LARABe -> LARAB      | NONE              |
| PMT_GLY        | Glycerol plasma membrane transport            | No_EC     | GLe <-> GL           | NONE              |
| PMT_RL         | D-Ribulose plasma membrane transport          | No_EC     | RLe -> RL            | NONE              |
| PMT_XYL        | D-Xylose plasma membrane transport            | No_EC     | XYLe -> XYL          | NONE              |
| PMT_XUL        | D-Xylulose plasma membrane transport          | No_EC     | XULe -> XUL          | NONE              |
| PMT_LXUL       | L-Xylulose plasma membrane transport          | No_EC     | LXULe -> LXUL        | NONE              |
| PMT_AOL        | D-Arabitol plasma membrane transport          | No_EC     | AOLe <-> AOL         | NONE              |
| PMT_XOL        | Xylitol plasma membrane transport             | No_EC     | XOLe <-> XOL         | NONE              |
| PMT_LACT       | Lactose plasma membrane transport             | No_EC     | LACTe -> LACT        | NONE              |
| PMT_GLCNT      | D-Gluconate plasma membrane transport         | No_EC     | GLCNTe <-> GLCNT     | NONE              |



| Gene name            | Enzyme name                                     | EC number | Biochemical reaction     | Annotation method |
|----------------------|-------------------------------------------------|-----------|--------------------------|-------------------|
| PMT_TAR              | Tartrate plasma membrane transport              | No_EC     | TARe <-> TAR             | NONE              |
| PMT_PROP             | Propanoate plasma membrane transport            | No_EC     | PROPe <-> PROP           | NONE              |
| PMT_LRL              | L-Ribulose plasma membrane transport            | No_EC     | LRLe -> LRL              | NONE              |
| PMT_TGE              | Tagatose plasma membrane transport              | No_EC     | TGEe -> TGE              | NONE              |
| PMT_GALNT            | D-Galactonate plasma membrane transport         | No_EC     | GALNTe <-> GALNT         | NONE              |
| PMT_GLCN15LAC        | D-Glucono-1,5-lactone plasma membrane transport | No_EC     | GLCN15LACe <-> GLCN15LAC | NONE              |
| PMT_GALOL            | Galactitol plasma membrane transport            | No_EC     | GALOLe <-> GALOL         | NONE              |
| PMT_FMN              | FMN plasma membrane transport                   | No_EC     | FMNe <-> FMN             | NONE              |
| PMT_RIBFLAV          | Riboflavin plasma membrane transport            | No_EC     | RIBFLAVe <-> RIBFLAV     | NONE              |
| PMT_DOPA             | L-Dopa plasma membrane transport                | No_EC     | DOPAE <-> DOPA           | NONE              |
| PMT_DOQUI            | Dopaquinone plasma membrane transport           | No_EC     | DOQUIe <-> DOQUI         | NONE              |
| PMT_GALUNT           | D-Galacturonate plasma membrane transport       | No_EC     | GALUNTe <-> GALUNT       | NONE              |
| PMT_H2O2             | H2O2 plasma membrane transport                  | No_EC     | H2O2e <-> H2O2           | NONE              |
| PMT_13GLUCAN         | 1,3-beta-D-Glucan                               | No_EC     | 13GLUCANe <-> 13GLUCAN   | NONE              |
| PMT_CHIB             | Chitobiose plasma membrane transport            | No_EC     | CHIBe -> CHIB            | NONE              |
| PMT_CHITO            | Chitosan plasma membrane transport              | No_EC     | CHIToe -> CHITO          | NONE              |
| PMT_CHIT             | Chitin plasma membrane transport                | No_EC     | CHITe <-> CHIT           | NONE              |
| PMT_CELLOB           | Cellobiose plasma membrane transport            | No_EC     | CELLOBe <-> CELLOB       | NONE              |
| PMT_GLYCOGEN         | Glycogen plasma membrane transport              | No_EC     | GLYCOGENe -> GLYCOGEN    | NONE              |
| PMT_STAR             | Starch plasma membrane transport                | No_EC     | STARe -> STAR            | NONE              |
| PMT_MANNAN           | Mannan plasma membrane transport                | No_EC     | MANNANe -> MANNAN        | NONE              |
| PMT_XYLAN            | Xylan plasma membrane transport                 | No_EC     | XYLANe -> XYLAN          | NONE              |
| <b># Amino acids</b> |                                                 |           |                          | NONE              |
| AO090005000114       | Amino acid permease                             | No_EC     | ALAE -> ALA              | BLASTP            |
| AO090010000564       | Amino acid permease                             | No_EC     | ALAE -> ALA              | BLASTP            |
| AO090102000632       | Amino acid permease                             | No_EC     | ALAE -> ALA              | BLASTP            |
| AO090103000082       | Amino acid permease                             | No_EC     | ALAE -> ALA              | BLASTP            |
| AO090011000820       | Dicarboxylic amino acid permease                | No_EC     | ALAE -> ALA              | BLASTP            |
| AO090005000114       | Amino acid permease                             | No_EC     | ARGe -> ARG              | BLASTP            |
| AO090010000564       | Amino acid permease                             | No_EC     | ARGe -> ARG              | BLASTP            |
| AO090102000632       | Amino acid permease                             | No_EC     | ARGe -> ARG              | BLASTP            |



| Gene name      | Enzyme name                                             | EC number | Biochemical reaction | Annotation method |
|----------------|---------------------------------------------------------|-----------|----------------------|-------------------|
| AO090103000082 | Amino acid permease                                     | No_EC     | ARGe -> ARG          | BLASTP            |
| AO090005000114 | Amino acid permease                                     | No_EC     | ASNe -> ASN          | BLASTP            |
| AO090010000564 | Amino acid permease                                     | No_EC     | ASNe -> ASN          | BLASTP            |
| AO090102000632 | Amino acid permease                                     | No_EC     | ASNe -> ASN          | BLASTP            |
| AO090103000082 | Amino acid permease                                     | No_EC     | ASNe -> ASN          | BLASTP            |
| AO090011000820 | Dicarboxylic amino acid permease                        | No_EC     | ASNe -> ASN          | BLASTP            |
| AO090005000114 | Amino acid permease                                     | No_EC     | ASPe -> ASP          | BLASTP            |
| AO090010000564 | Amino acid permease                                     | No_EC     | ASPe -> ASP          | BLASTP            |
| AO090102000632 | Amino acid permease                                     | No_EC     | ASPe -> ASP          | BLASTP            |
| AO090103000082 | Amino acid permease                                     | No_EC     | ASPe -> ASP          | BLASTP            |
| AO090011000116 | Amino acid permease for serine, aspartate and glutamate | No_EC     | ASPe -> ASP          | BLASTP            |
| AO090011000820 | Dicarboxylic amino acid permease                        | No_EC     | ASPe -> ASP          | BLASTP            |
| AO090005000114 | Amino acid permease                                     | No_EC     | CYSe -> CYS          | BLASTP            |
| AO090010000564 | Amino acid permease                                     | No_EC     | CYSe -> CYS          | BLASTP            |
| AO090102000632 | Amino acid permease                                     | No_EC     | CYSe -> CYS          | BLASTP            |
| AO090103000082 | Amino acid permease                                     | No_EC     | CYSe -> CYS          | BLASTP            |
| AO090005000114 | Amino acid permease                                     | No_EC     | GLYe -> GLY          | BLASTP            |
| AO090010000564 | Amino acid permease                                     | No_EC     | GLYe -> GLY          | BLASTP            |
| AO090102000632 | Amino acid permease                                     | No_EC     | GLYe -> GLY          | BLASTP            |
| AO090103000082 | Amino acid permease                                     | No_EC     | GLYe -> GLY          | BLASTP            |
| AO090011000820 | Dicarboxylic amino acid permease                        | No_EC     | GLYe -> GLY          | BLASTP            |
| AO090005000114 | Amino acid permease                                     | No_EC     | GLUe -> GLU          | BLASTP            |
| AO090010000564 | Amino acid permease                                     | No_EC     | GLUe -> GLU          | BLASTP            |
| AO090102000632 | Amino acid permease                                     | No_EC     | GLUe -> GLU          | BLASTP            |
| AO090103000082 | Amino acid permease                                     | No_EC     | GLUe -> GLU          | BLASTP            |
| AO090011000116 | Amino acid permease for serine, aspartate and glutamate | No_EC     | GLUe -> GLU          | BLASTP            |

| Gene name      | Enzyme name                         | EC number | Biochemical reaction | Annotation method |
|----------------|-------------------------------------|-----------|----------------------|-------------------|
| AO090011000820 | Dicarboxylic amino acid permease    | No_EC     | GLUe -> GLU          | BLASTP            |
| AO090005000114 | Amino acid permease                 | No_EC     | GLNe -> GLN          | BLASTP            |
| AO090010000564 | Amino acid permease                 | No_EC     | GLNe -> GLN          | BLASTP            |
| AO090102000632 | Amino acid permease                 | No_EC     | GLNe -> GLN          | BLASTP            |
| AO090103000082 | Amino acid permease                 | No_EC     | GLNe -> GLN          | BLASTP            |
| AO090011000820 | Dicarboxylic amino acid permease    | No_EC     | GLNe -> GLN          | BLASTP            |
| AO090005000114 | Amino acid permease                 | No_EC     | HISe -> HIS          | BLASTP            |
| AO090010000564 | Amino acid permease                 | No_EC     | HISe -> HIS          | BLASTP            |
| AO090102000632 | Amino acid permease                 | No_EC     | HISe -> HIS          | BLASTP            |
| AO090103000082 | Amino acid permease                 | No_EC     | HISe -> HIS          | BLASTP            |
| AO090005000114 | Amino acid permease                 | No_EC     | ILEe -> ILE          | BLASTP            |
| AO090010000564 | Amino acid permease                 | No_EC     | ILEe -> ILE          | BLASTP            |
| AO090102000632 | Amino acid permease                 | No_EC     | ILEe -> ILE          | BLASTP            |
| AO090103000082 | Amino acid permease                 | No_EC     | ILEe -> ILE          | BLASTP            |
| AO090005000114 | Amino acid permease                 | No_EC     | LEUe -> LEU          | BLASTP            |
| AO090010000564 | Amino acid permease                 | No_EC     | LEUe -> LEU          | BLASTP            |
| AO090102000632 | Amino acid permease                 | No_EC     | LEUe -> LEU          | BLASTP            |
| AO090103000082 | Amino acid permease                 | No_EC     | LEUe -> LEU          | BLASTP            |
| AO090005000114 | Amino acid permease                 | No_EC     | METe -> MET          | BLASTP            |
| AO090010000564 | Amino acid permease                 | No_EC     | METe -> MET          | BLASTP            |
| AO090102000632 | Amino acid permease                 | No_EC     | METe -> MET          | BLASTP            |
| AO090103000082 | Amino acid permease                 | No_EC     | METe -> MET          | BLASTP            |
| AO090023000646 | Methionine permease (High affinity) | No_EC     | METe -> MET          | BLASTP            |
| AO090005000114 | Amino acid permease                 | No_EC     | PHEe -> PHE          | BLASTP            |
| AO090010000564 | Amino acid permease                 | No_EC     | PHEe -> PHE          | BLASTP            |
| AO090102000632 | Amino acid permease                 | No_EC     | PHEe -> PHE          | BLASTP            |
| AO090103000082 | Amino acid permease                 | No_EC     | PHEe -> PHE          | BLASTP            |
| AO090005000114 | Amino acid permease                 | No_EC     | PROe -> PRO          | BLASTP            |
| AO090010000564 | Amino acid permease                 | No_EC     | PROe -> PRO          | BLASTP            |

| Gene name      | Enzyme name                                             | EC number | Biochemical reaction | Annotation method |
|----------------|---------------------------------------------------------|-----------|----------------------|-------------------|
| AO090102000632 | Amino acid permease                                     | No_EC     | PROe -> PRO          | BLASTP            |
| AO090103000082 | Amino acid permease                                     | No_EC     | PROe -> PRO          | BLASTP            |
| AO090010000119 | Proline permease                                        | No_EC     | PROe -> PRO          | BLASTP            |
| AO090011000293 | Proline permease                                        | No_EC     | PROe -> PRO          | BLASTP            |
| AO090011000034 | Proline permease                                        | No_EC     | PROe -> PRO          | BLASTP            |
| AO090026000738 | Proline permease                                        | No_EC     | PROe -> PRO          | BLASTP            |
| AO090005000114 | Amino acid permease                                     | No_EC     | TRPe -> TRP          | BLASTP            |
| AO090010000564 | Amino acid permease                                     | No_EC     | TRPe -> TRP          | BLASTP            |
| AO090102000632 | Amino acid permease                                     | No_EC     | TRPe -> TRP          | BLASTP            |
| AO090103000082 | Amino acid permease                                     | No_EC     | TRPe -> TRP          | BLASTP            |
| AO090005000114 | Amino acid permease                                     | No_EC     | TYRe -> TYR          | BLASTP            |
| AO090010000564 | Amino acid permease                                     | No_EC     | TYRe -> TYR          | BLASTP            |
| AO090102000632 | Amino acid permease                                     | No_EC     | TYRe -> TYR          | BLASTP            |
| AO090103000082 | Amino acid permease                                     | No_EC     | TYRe -> TYR          | BLASTP            |
| AO090005000114 | Amino acid permease                                     | No_EC     | VALe -> VAL          | BLASTP            |
| AO090010000564 | Amino acid permease                                     | No_EC     | VALe -> VAL          | BLASTP            |
| AO090102000632 | Amino acid permease                                     | No_EC     | VALe -> VAL          | BLASTP            |
| AO090103000082 | Amino acid permease                                     | No_EC     | VALe -> VAL          | BLASTP            |
| AO090005000114 | Amino acid permease                                     | No_EC     | SERe -> SER          | BLASTP            |
| AO090010000564 | Amino acid permease                                     | No_EC     | SERe -> SER          | BLASTP            |
| AO090102000632 | Amino acid permease                                     | No_EC     | SERe -> SER          | BLASTP            |
| AO090103000082 | Amino acid permease                                     | No_EC     | SERe -> SER          | BLASTP            |
| AO090011000116 | Amino acid permease for serine, aspartate and glutamate | No_EC     | SERe -> SER          | BLASTP            |
| AO090011000820 | Dicarboxylic amino acid permease                        | No_EC     | SERe -> SER          | BLASTP            |
| AO090005000114 | Amino acid permease                                     | No_EC     | THRe -> THR          | BLASTP            |
| AO090010000564 | Amino acid permease                                     | No_EC     | THRe -> THR          | BLASTP            |
| AO090102000632 | Amino acid permease                                     | No_EC     | THRe -> THR          | BLASTP            |
| AO090103000082 | Amino acid permease                                     | No_EC     | THRe -> THR          | BLASTP            |
| AO090005000114 | Amino acid permease                                     | No_EC     | LYSe -> LYS          | BLASTP            |
| AO090010000564 | Amino acid permease                                     | No_EC     | LYSe -> LYS          | BLASTP            |

| Gene name                   | Enzyme name                              | EC number | Biochemical reaction | Annotation method |
|-----------------------------|------------------------------------------|-----------|----------------------|-------------------|
| AO090102000632              | Amino acid permease                      | No_EC     | LYSe -> LYS          | BLASTP            |
| AO090103000082              | Amino acid permease                      | No_EC     | LYSe -> LYS          | BLASTP            |
| AO090701000858              | Lysine specific permease (High affinity) | No_EC     | LYSe -> LYS          | BLASTP            |
| AO090011000204              | Gaba specific permease                   | No_EC     | GABAe -> GABA        | BLASTP            |
| AO090009000635              | Gaba specific permease                   | No_EC     | GABAe -> GABA        | BLASTP            |
| AO090009000552              | Choline transport protein                | No_EC     | CHOe -> CHO          | BLASTP            |
| AO090102000493              | Choline transport protein                | No_EC     | CHOe -> CHO          | BLASTP            |
| <b># Nucleotides</b>        |                                          |           |                      |                   |
| AO090012000565              | Uracil permease                          | No_EC     | UR Ae -> URA         | BLASTP            |
| AO090005000019              | Uracil permease                          | No_EC     | UR Ae -> URA         | BLASTP            |
| AO090011000649              | Purine-cytosine permease                 | No_EC     | CYTSe -> CYTS        | BLASTP            |
| AO090011000649              | Purine-cytosine permease                 | No_EC     | ADe -> AD            | BLASTP            |
| AO090011000649              | Purine-cytosine permease                 | No_EC     | GNe -> GN            | BLASTP            |
| <b># Other compounds</b>    |                                          |           |                      |                   |
| PMT_CO2                     | CO2 plasma membrane transport            | No_EC     | CO2e <-> CO2         | NONE              |
| PMT_H2O                     | H2O plasma membrane transport            | No_EC     | H2Oe <-> H2O         | NONE              |
| PMT_O2                      | O2 plasma membrane transport             | No_EC     | O2e -> O2            | NONE              |
| PMT_H3PO4                   | H3PO4 plasma membrane transport          | No_EC     | PIe -> PI            | NONE              |
| PMT_H2SO3                   | H2SO3 plasma membrane transport          | No_EC     | H2SO3e -> H2SO3      | NONE              |
| AO090003000798              | Sulfate transporter                      | No_EC     | SLFe -> SLF          | BLASTP            |
| AO090009000456              | Sulfate transporter                      | No_EC     | SLFe -> SLF          | BLASTP            |
| AO090038000314              | Ammonium transporter                     | No_EC     | NH3e -> NH3          | BLASTP            |
| AO090001000707              | Ammonium transporter                     | No_EC     | NH3e -> NH3          | BLASTP            |
| AO090026000749              | Ammonium transporter                     | No_EC     | NH3e -> NH3          | BLASTP            |
| AO090012000623              | Nitrate permease                         | No_EC     | HNO3e -> HNO3        | BLASTP            |
| AO090102000343              | Potassium ion transporter                | No_EC     | Ke + He <-> K        | BLASTP            |
| AO090011000734              | Potassium ion transporter                | No_EC     | Ke + He <-> K        | BLASTP            |
| AO090102000102              | Na+/H+ exchanger                         | No_EC     | Nae <-> Na + He      | BLASTP            |
| <b># Alcohols and acids</b> |                                          |           |                      |                   |
| PMT_ETH                     | Ethanol plasma membrane transport        | No_EC     | ETHe <-> ETH         | NONE              |
| PMT_METHOL                  | Methanol plasma membrane transport       | No_EC     | METHOLe <-> METHOL   | NONE              |

| Gene name                                | Enzyme name                                                         | EC number | Biochemical reaction | Annotation method |
|------------------------------------------|---------------------------------------------------------------------|-----------|----------------------|-------------------|
| PMT_AC                                   | Acetate plasma membrane transport                                   | No_EC     | ACe <-> AC           | NONE              |
| PMT_FOR                                  | Formate plasma membrane transport                                   | No_EC     | FORe <-> FOR         | NONE              |
| PMT_LLAC                                 | L-Lactate plasma membrane transport                                 | No_EC     | LLACe <-> LLAC       | NONE              |
| PMT_LAC                                  | Lactate plasma membrane transport                                   | No_EC     | LACe <-> LAC         | NONE              |
| PMT_PYR                                  | Pyruvate plasma membrane transport                                  | No_EC     | PYRe <-> PYR         | NONE              |
| PMT_SUCC                                 | Succinate plasma membrane transport                                 | No_EC     | SUCCe <-> SUCC       | NONE              |
| PMT_MAL                                  | Malate plasma membrane transport                                    | No_EC     | MALe <-> MAL         | NONE              |
| PMT_AKG                                  | 2-oxoglutarate plasma membrane transport                            | No_EC     | AKGe <-> AKG         | NONE              |
| PMT_CIT                                  | Citrate plasma membrane transport                                   | No_EC     | CITe <-> CIT         | NONE              |
| PMT_FUM                                  | Fumarate plasma membrane transport                                  | No_EC     | FUMe <-> FUM         | NONE              |
| PMT_ICIT                                 | Isocitrate plasma membrane transport                                | No_EC     | ICITe <-> ICIT       | NONE              |
| PMT_OXAL                                 | Oxalate plasma membrane transport                                   | No_EC     | OXALe <-> OXAL       | NONE              |
| PMT_OA                                   | Oxaloacetate plasma membrane transport                              | No_EC     | OAc <-> OA           | NONE              |
| <b># Mitochondria membrane transport</b> |                                                                     |           |                      |                   |
| MMT_CO2                                  | CO2 mitochondrial membrane transport                                | No_EC     | CO2 <-> CO2m         | NONE              |
| MMT_H2O                                  | H2O mitochondrial membrane transport                                | No_EC     | H2O <-> H2Om         | NONE              |
| MMT_O2                                   | O2 mitochondrial membrane transport                                 | No_EC     | O2 <-> O2m           | NONE              |
| AO090005001192                           | Mitochondrial phosphate carrier                                     | No_EC     | PI <-> PIm           | BLASTP            |
| AO090120000053                           | Mitochondrial phosphate carrier                                     | No_EC     | PI <-> PIm           | BLASTP            |
| AO090005001430                           | Mitochondrial phosphate carrier                                     | No_EC     | PI <-> PIm           | BLASTP            |
| AO090026000437                           | Mitochondrial phosphate carrier                                     | No_EC     | PI <-> PIm           | BLASTP            |
| MMT_NH3                                  | NH3 mitochondrial membrane transport                                | No_EC     | NH3 <-> NH3m         | NONE              |
| MMT_ORN                                  | Mitochondrial ornithine carrier                                     | No_EC     | ORN <-> ORNm         | NONE              |
| MMT_PA                                   | Phosphatidate mitochondrial membrane transport                      | No_EC     | PA -> PAm            | NONE              |
| MMT_OIVAL                                | Mitochondrial 2-Oxoisovalerate carrier                              | No_EC     | OIVAL <-> OIVALm     | NONE              |
| MMT_IPPMAL                               | Mitochondrial 2-Isopropylmalate carrier                             | No_EC     | IPPMAL <-> IPPMALm   | NONE              |
| MMT_OMVAL                                | Mitochondrial 2-keto-3-methyl-valerate carrier                      | No_EC     | OMVAL <-> OMVALm     | NONE              |
| MMT_THR                                  | Mitochondrial L-Threonine carrier                                   | No_EC     | THRm <-> THR         | NONE              |
| MMT_OICAP                                | 3-Carboxy-4-methyl-2-oxopentanoate mitochondrial membrane transport | No_EC     | OICAPm <-> OICAP     | NONE              |

| Gene name   | Enzyme name                                                     | EC number | Biochemical reaction       | Annotation method |
|-------------|-----------------------------------------------------------------|-----------|----------------------------|-------------------|
| MMT_CAP     | Carbamoyl phosphate mitochondrial membrane transport            | No_EC     | CAPm <-> CAP               | NONE              |
| MMT_KYN     | L-Kynurenine mitochondrial membrane transport                   | No_EC     | KYNm <-> KYN               | NONE              |
| MMT_HKYN    | 3-Hydroxykynurenine mitochondrial membrane transport            | No_EC     | HKYNm <-> HKYN             | NONE              |
| MMT_DOROA   | Dihydroorotate mitochondrial membrane transport                 | No_EC     | DOROAm <-> DOROA           | NONE              |
| MMT_OROA    | Orotate mitochondrial membrane transport                        | No_EC     | OROAm <-> OROA             | NONE              |
| MMT_THF     | Tetrahydrofolate mitochondrial membrane transport               | No_EC     | THF <-> THFm               |                   |
| MMT_FTHF    | Formyltetrahydrofolate mitochondrial membrane transport         | No_EC     | FTHF <-> FTHFm             |                   |
| MMT_METTHF  | 5,10-Methylenetetrahydrofolate mitochondrial membrane transport | No_EC     | METTHF <-> METTHFm         | NONE              |
| MMT_METHF   | 5,10-Methenyltetrahydrofolate mitochondrial membrane transport  | No_EC     | METHFm <-> METHF           | NONE              |
| MMT_ETH     | Ethanol mitochondrial membrane transport                        | No_EC     | ETH <-> ETHm               | NONE              |
| MMT_AC      | Acetate mitochondrial membrane transport                        | No_EC     | AC <-> ACm                 | NONE              |
| MMT_ACAL    | Acetaldehyde mitochondrial membrane transport                   | No_EC     | ACAL <-> ACALm             | NONE              |
| MMT_FOR     | Formate mitochondrial membrane transport                        | No_EC     | FOR <-> FORm               | NONE              |
| MMT_PYR     | Mitochondrial pyruvate carrier                                  | No_EC     | PYR -> PYRm                | NONE              |
| MMT_ICITMAL | Isocitrate/malate mitochondrial membrane transport              | No_EC     | ICITm + MAL -> ICIT + MALm | NONE              |
| MMT_CITMAL  | Citrate/malate mitochondrial membrane transport                 | No_EC     | CITm + MAL -> CIT + MALm   | NONE              |
| MMT_AKG     | 2-oxoglutarate mitochondrial membrane transport                 | No_EC     | AKGm <-> AKG               | NONE              |
| MMT_SUCC    | Succinate mitochondrial membrane transport                      | No_EC     | SUCCm <-> SUCC             | NONE              |
| MMT_FUM     | Fumarate mitochondrial membrane transport                       | No_EC     | FUMm <-> FUM               | NONE              |
| MMT_MAL     | Malate mitochondrial membrane transport                         | No_EC     | MALm <-> MAL               | NONE              |
| MMT_CIT     | Citrate mitochondrial membrane transport                        | No_EC     | CITm <-> CIT               | NONE              |
| MMT_ICIT    | Isocitrate mitochondrial membrane transport                     | No_EC     | ICITm <-> ICIT             | NONE              |

| Gene name                           | Enzyme name                                                         | EC number | Biochemical reaction                     | Annotation method |
|-------------------------------------|---------------------------------------------------------------------|-----------|------------------------------------------|-------------------|
| AO090102000125                      | Succinate/fumarate antiporter                                       | No_EC     | SUCC + FUMm -> SUCCm + FUM               | BLASTP            |
| AO090120000354                      | Mitochondrial oxaloacetate carrier                                  | No_EC     | OA <-> OAm                               | BLASTP            |
| AO090026000334                      | Dicarboxylate carrier                                               | No_EC     | SUCC + PIm -> SUCCm + PI                 | BLASTP            |
| AO090026000334                      | Dicarboxylate carrier                                               | No_EC     | MAL + SUCCm <-> MALm + SUCC              | BLASTP            |
| AO090026000334                      | Dicarboxylate carrier                                               | No_EC     | MAL + PIm <-> MALm + PI                  | BLASTP            |
| AO090020000012                      | Citrate transport protein                                           | No_EC     | CIT + MALm <-> CITm + MAL                | BLASTP            |
| AO090020000012                      | Citrate transport protein                                           | No_EC     | CIT + ICITm <-> CITm + ICIT              | BLASTP            |
| AO090020000012                      | Citrate transport protein                                           | No_EC     | CIT + PEPm <-> CITm + PEP                | BLASTP            |
| MMT_GLU                             | Glutamate carrier                                                   | No_EC     | GLU <-> GLUm                             | NONE              |
| AO090009000405                      | ADP/ATP carrier protein (MCF)                                       | No_EC     | ADP + ATPm + PI -> Hm + ADPm + ATP + PIm | BLASTP            |
| MMT_SAM                             | S-Adenosyl-L-methionine mitochondrial membrane transport            | No_EC     | SAM <-> SAMm                             | NONE              |
| MMT_SAH                             | S-Adenosyl-L-homocysteine mitochondrial membrane transport          | No_EC     | SAH <-> SAHm                             | NONE              |
| MMT_GLY                             | Glycine mitochondrial membrane transport                            | No_EC     | GLYm <-> GLY                             | NONE              |
| MMT_SER                             | Serine mitochondrial membrane transport                             | No_EC     | SERm <-> SER                             | NONE              |
| MMT_ILE                             | Isoleucine mitochondrial membrane transport                         | No_EC     | ILEm <-> ILE                             | NONE              |
| MMT_VAL                             | Valine mitochondrial membrane transport                             | No_EC     | VALm <-> VAL                             | NONE              |
| MMT_LEU                             | Leucine mitochondrial membrane transport                            | No_EC     | LEUm <-> LEU                             | NONE              |
| MMT_CITR                            | Citrulline mitochondrial membrane transport                         | No_EC     | CITRm <-> CITR                           | NONE              |
| MMT_FAD                             | FAD transport protein                                               | No_EC     | FAD + FMNm -> FADm + FMN                 | NONE              |
| MMT_H3MCOA                          | (S)-3-Hydroxy-3-methylglutaryl-CoA mitochondrial membrane transport | No_EC     | H3MCOA <-> H3MCOAm                       | NONE              |
| MMT_DHF                             | Dihydrofolate mitochondrial membrane transport                      | No_EC     | DHF <-> DHFm                             | NONE              |
| MMT_PROP                            | Propanoate mitochondria membrane transporter                        | No_EC     | PROP <-> PROPM                           | NONE              |
| <b># Shuttle</b>                    |                                                                     |           |                                          |                   |
| <b># Glycerol phosphate shuttle</b> |                                                                     |           |                                          |                   |
| SHUTM_GL3P                          | Glycerol phosphate shuttle                                          | No_EC     | GL3P -> GL3Pm                            | NONE              |
| <b># Malate-Aspartate shuttle</b>   |                                                                     |           |                                          |                   |
| SHUTM_ASPGLU                        | Aspartate shuttle                                                   | No_EC     | ASPm + GLU <-> ASP + GLUm                | NONE              |
| SHUTM_MALAKG                        | Malate shuttle                                                      | No_EC     | MAL + AKGm <-> MALm + AKG                | NONE              |

| Gene name                               | Enzyme name                                          | EC number | Biochemical reaction       | Annotation method |
|-----------------------------------------|------------------------------------------------------|-----------|----------------------------|-------------------|
| <b># Carnitine shuttle</b>              |                                                      |           |                            |                   |
| AO090103000383                          | Carnitine carrier                                    | No_EC     | CARm + ACAR -> CAR + ACARm | NONE              |
| <b># Peroxisomal membrane transport</b> |                                                      |           |                            |                   |
| PxMT_CO2                                | CO2 peroxisomal membrane transport                   | No_EC     | CO2p <-> CO2               | NONE              |
| PxMT_H2O                                | H2O peroxisomal membrane transport                   | No_EC     | H2Op <-> H2O               | NONE              |
| PxMT_O2                                 | O2 peroxisomal membrane transport                    | No_EC     | O2p <-> O2                 | NONE              |
| PxMT_ICITMAL                            | Isocitrate/malate peroxisomal membrane transport     | No_EC     | ICIT + MALp -> ICITp + MAL | NONE              |
| PxMT_SUCC                               | Succinate peroxisomal membrane transport             | No_EC     | SUCCp <-> SUCC             | NONE              |
| AO090005000361                          | Malic acid transport protein                         | No_EC     | MALp -> MAL                | BLASTP            |
| PxMT_HIURTE                             | 3-hydroxy-isobutyrate peroxisomal membrane transport | No_EC     | HIURTEp <-> HIURTE         | NONE              |
| PxMT_AKG                                | 2-oxoglutarate peroxisomal membrane transport        | No_EC     | AKGp -> AKG                | NONE              |
| AO090003000496                          | Allantoate transporter                               | No_EC     | ATTp <-> ATT               | BLASTP            |
| AO090009000507                          | Allantoate transporter                               | No_EC     | ATTp <-> ATT               | BLASTP            |
| AO090003000854                          | Urea active transporter                              | No_EC     | UREAp <-> UREA             | BLASTP            |
| AO090003001423                          | Urea active transporter                              | No_EC     | UREAp <-> UREA             | BLASTP            |
| PxMT_PYR                                | Pyruvate peroxisomal membrane transport              | No_EC     | PYRp -> PYR                | NONE              |
| PxMT_PROPCOA                            | Propanoyl-CoA peroxisomal membrane transport         | No_EC     | PROPCOAp <-> PROPCOA       | NONE              |
| PxMT_GLAL                               | Glycoaldehyde peroxisomal membrane transport         | No_EC     | GLALp <-> GLAL             | NONE              |
| PxMT_OA                                 | Oxaloacetate peroxisomal membrane transport          | No_EC     | OAp <-> OA                 | NONE              |
| PxMT_XAN                                | Xanthine peroxisomal membrane transport              | No_EC     | XANp <-> XAN               | NONE              |
| PxMT_UGC                                | Ureidoglycolate peroxisomal membrane transport       | No_EC     | UGC -> UGCp                | NONE              |
| PxMT_H2O2                               | H2O2 peroxisomal membrane transport                  | No_EC     | H2O2p <-> H2O2             | NONE              |



**Suppl. Table 2:** List of the abbreviations for metabolite names used in the reaction list of *A. oryzae* (Suppl. Table 1) and their full name. An “m” denotes that the metabolite is found in the mitochondria. A “p” indicates that the metabolite is found in the peroxisome whereas an “e” is used to mark an extracellular metabolite.

| Abbreviation | Full name of metabolite                                         |
|--------------|-----------------------------------------------------------------|
| 1368THN      | 1,3,6,8-THN                                                     |
| 138THN       | 1,3,8-THN                                                       |
| 13GLUCAN     | 1,3-beta-D-Glucan                                               |
| 13GLUCANe    | 1,3-beta-D-Glucan (Extracellular)                               |
| 13PDG        | 1,3-Bisphospho-D-glycerate                                      |
| 14MNAN       | 1,4 beta Mannan                                                 |
| 18DHN        | 1,8-DHN                                                         |
| 2D3DGALT     | 2-Dehydro-3-deoxy-D-galactonate                                 |
| 2MACOP       | 2-Methyl-cis-aconitate (Peroxisome)                             |
| 2MCITp       | 2-Methylcitrate (Peroxisome)                                    |
| 2MICITp      | 2-Methylisocitrate (Peroxisome)                                 |
| 2N6H         | 2-octaprenyl-6-hydroxyphenol                                    |
| 2NMHMBm      | 3-demethylubiquinone-8 (Mitochondria)                           |
| 2NPMBm       | 2-octaprenyl-6-methoxy-1,4-benzoquinone (Mitochondria)          |
| 2NPMMBm      | 2-octaprenyl-3-methyl-6-methoxy-1,4-benzoquinone (Mitochondria) |
| 2NPMP        | 2-octaprenyl-6-methoxyphenol                                    |
| 2NPMPm       | 2-octaprenyl-6-methoxyphenol (Mitochondria)                     |
| 2NPPP        | 2-octaprenylphenol                                              |
| 2PG          | 2-Phospho-D-glycerate                                           |
| 3DDAH7P      | 2-Dehydro-3-deoxy-D-arabino-heptonate 7-phosphate               |
| 3PG          | 3-Phospho-D-glycerate                                           |
| 3PSEr        | 3-Phosphoserine                                                 |
| 3PSME        | 5-O-(1-Carboxyvinyl)-3-phosphoshikimate                         |
| 3SULALA      | 3-sulfinoalanine                                                |
| 4CMCOA       | 4-coumaroyl-COA                                                 |
| 4CMRE        | 4-hydroxycinnamate                                              |
| 4HBZ         | 4-hydroxybenzoate                                               |
| 4HPP         | 4-Hydroxyphenyl pyruvate                                        |
| 4PPNCYS      | 4-Phosphopantothenoyl-L-cysteine                                |
| 4PPNTE       | Pantetheine 4'-phosphate                                        |
| 4PPNTO       | D-4'-Phosphopantothenate                                        |
| 5MTA         | 5'-Methylthioadenosine                                          |
| 5OXOPRO      | 5-oxo-L-proline                                                 |
| 5THR1P       | S-methyl-5-thio- $\alpha$ -D-ribose 1-phosphate                 |
| 6CARHEX      | 6-carboxyhexanoate                                              |
| 7DECHORES    | Cholesta-5,7-dien-3-beta-ol                                     |
| A6RP         | 5-amino-6-ribityluracil                                         |
| A6RP5P       | 5-amino-6-(5-phosphoribosylamino) uracil                        |
| A6RP5P2      | 5-amino-6-(5-phosphoribitylamino) uracil                        |
| AACACP       | 3-oxoacyl-[acyl-carrier protein]                                |
| AACCOA       | Acetoacetyl coenzyme A                                          |
| AACCOAm      | Acetoacetyl coenzyme A (Mitochondria)                           |
| AACCOAp      | Acetoacetyl coenzyme A (Peroxisome)                             |
| ABUTm        | 2-Aceto-2-hydroxy butyrate (Mitochondria)                       |
| AC           | Acetate                                                         |
| ACACP        | Acyl-[acyl-carrier protein]                                     |
| ACAL         | Acetaldehyde                                                    |
| ACALm        | Acetaldehyde (Mitochondria)                                     |

| Abbreviation | Full name of metabolite                                                            |
|--------------|------------------------------------------------------------------------------------|
| ACAR         | O-Acetylcarnitine                                                                  |
| ACARm        | O-Acetylcarnitine (Mitochondria)                                                   |
| ACCOA        | Acetyl coenzyme A                                                                  |
| ACCOAm       | Acetyl coenzyme A (Mitochondria)                                                   |
| ACCOAp       | Acetyl coenzyme A (Peroxisome)                                                     |
| ACe          | Acetate (Extracellular)                                                            |
| ACET         | Acetone                                                                            |
| ACETm        | Acetone (Mitochondria)                                                             |
| ACLACm       | 2-Acetolactate (Mitochondria)                                                      |
| ACm          | Acetate (Mitochondria)                                                             |
| ACOA         | Acyl coenzyme A                                                                    |
| ACOm         | Cis-Aconitate (Mitochondria)                                                       |
| ACP          | Acetate (Peroxisome)                                                               |
| ACPC         | 1-aminocyclopropane-1-carboxylate                                                  |
| ACPm         | Acyl-carrier protein (Mitochondria)                                                |
| ACTAC        | Acetoacetate                                                                       |
| ACTACm       | Acetoacetate (Mitochondria)                                                        |
| ACTP         | Acetyl phosphate                                                                   |
| ACTPm        | Acetyl phosphate (Mitochondria)                                                    |
| ACYBUT       | Gamma-Amino-gamma-cyanobutanoate                                                   |
| AD           | Adenine                                                                            |
| ADCHOR       | 4-Amino-4-deoxychorismate                                                          |
| ADe          | Adenine (Extracellular)                                                            |
| ADN          | Adenosine                                                                          |
| ADP          | ADP                                                                                |
| ADPm         | ADP (Mitochondria)                                                                 |
| ADPRIB       | ADP-ribose                                                                         |
| ADPRIBm      | ADP-ribose (Mitochondria)                                                          |
| AFB1         | Aflatoxin B1                                                                       |
| AFB2         | Aflatoxin B2                                                                       |
| AFG1         | Aflatoxin G1                                                                       |
| AFG2         | Aflatoxin G2                                                                       |
| AGL3P        | Acyl-sn-glycerol 3-phosphate                                                       |
| AGMT         | Agmatine                                                                           |
| AHHMD        | 2-Amino-7,8-dihydro-4-hydroxy-6-(diphosphoxymethyl)pteridine                       |
| AHHMP        | 2-Amino-4-hydroxy-6-hydroxymethyl-7,8-dihydropteridine                             |
| AHM          | 4-amino-5-hydroxymethyl-2-methylpyrimidine                                         |
| AHMP         | 4-amino-5-phosphomethyl-2-methylpyrimidine                                         |
| AHMPP        | 4-amino-2-methyl-5-diphosphomethylpyrimidine                                       |
| AHTD         | 2-Amino-4-hydroxy-6-(erythro-1,2,3-trihydroxypropyl)-dihydropteridine triphosphate |
| AICAR        | AICAR                                                                              |
| AIR          | Aminoimidazole ribotide                                                            |
| AKA          | 2-Oxoadipate                                                                       |
| AKG          | 2-Oxoglutarate                                                                     |
| AKGe         | 2-Oxoglutarate (Extracellular)                                                     |
| AKGm         | 2-Oxoglutarate (Mitochondria)                                                      |
| AKGp         | 2-Oxoglutarate (Peroxisome)                                                        |
| AKP          | 2-Dehydropantoate                                                                  |
| AKPm         | 2-Dehydropantoate (Mitochondria)                                                   |
| ALA          | L-Alanine                                                                          |
| ALAE         | L-Alanine (Extracellular)                                                          |

| Abbreviation | Full name of metabolite               |
|--------------|---------------------------------------|
| ALAGLY       | R-S-Alanylglycine                     |
| ALAm         | L-Alanine (Mitochondria)              |
| ALTRNA       | L-Arginyl-tRNA                        |
| AM6SA        | 2-Aminomuconate 6-semialdehyde        |
| AMA          | L-2-Aminoadipate                      |
| AMAC         | Aminoacetone                          |
| AMACm        | Aminoacetone (Mitochondria)           |
| AMASA        | L-2-Aminoadipate 6-semialdehyde       |
| AMIACE       | Aminoacetaldehyde                     |
| AMIEVUL      | 5-aminolevulinate                     |
| AMIEVULm     | 5-aminolevulinate (Mitochondria)      |
| AMOXOBU      | 2-amino-3oxobutanoate                 |
| AMP          | AMP                                   |
| AMPm         | AMP (Mitochondria)                    |
| AMPp         | AMP (Peroxisome)                      |
| AMUCO        | 2-Aminomuconate                       |
| AN           | Anthranilate                          |
| AOL          | D-Arabitol                            |
| AOLe         | D-Arabitol (Extracellular)            |
| AONA         | 8-Amino-7-oxononanoate                |
| AONAm        | 8-Amino-7-oxononanoate (Mitochondria) |
| APEBU        | 4-(2-aminophenyl)-2,4-dioxobutanoate  |
| APOCEm       | Apocytochrome C (Mitochondria)        |
| APROA        | 3-Aminopropanal                       |
| APROP        | Alpha-amino-propionitrile             |
| APRUT        | N-Acetylputrescine                    |
| APS          | Adenylylsulfate                       |
| ARAB         | D-Arabinose                           |
| ARABe        | D-Arabinose (Extracellular)           |
| ARABINe      | Arabinan (Extracellular)              |
| ARABLAC      | D-Arabinono-1,4-lactone               |
| ARG          | L-Arginine                            |
| ARGe         | L-Arginine (Extracellular)            |
| ARGSUCC      | N-(L-Arginino)succinate               |
| ASER         | O-Acetyl-L-serine                     |
| ASERm        | O-Acetyl-L-serine (Mitochondria)      |
| ASN          | L-Asparagine                          |
| ASNe         | L-Asparagine (Extracellular)          |
| ASNm         | L-Asparagine (Mitochondria)           |
| ASNTRNA      | L-Asparaginylyl-tRNA                  |
| ASNTRNAm     | L-Asparaginylyl-tRNA (Mitochondria)   |
| ASP          | L-Aspartate                           |
| ASPe         | L-Aspartate (Extracellular)           |
| ASPERMD      | N1-Acetylspermidine                   |
| ASPM         | L-Aspartate (Mitochondria)            |
| ASPSA        | L-Aspartate 4-semialdehyde            |
| ASPTRNA      | L-Aspartylyl-tRNA                     |
| ASPTRNAm     | L-Aspartylyl-tRNA (Mitochondria)      |
| ASUC         | N6-(1,2-Dicarboxyethyl)-AMP           |
| AT3P2        | Acyldihydroxyacetone phosphate        |
| ATN          | Allantoin                             |
| ATP          | ATP                                   |
| ATPm         | ATP (Mitochondria)                    |

| Abbreviation | Full name of metabolite                      |
|--------------|----------------------------------------------|
| ATPp         | ATP (Peroxisome)                             |
| ATT          | Allantoate                                   |
| ATTp         | Allantoate (Peroxisome)                      |
| AVF          | Averufin                                     |
| AVN          | Averantin                                    |
| bALA         | Beta-alanine                                 |
| BASP         | 4-Phospho-L-aspartate                        |
| BCCP         | Biotin carboxyl-carrier protein              |
| bDG6P        | Beta-D-Glucose 6-phosphate                   |
| bDGLC        | Beta-D-Glucose                               |
| bDGLCe       | Beta-D-Glucose (Extracellular)               |
| BETALD       | Betaine aldehyde                             |
| BT           | Biotin                                       |
| BTAMP        | Biotinyl-5-AMP                               |
| C100         | Decanoic acid                                |
| C100ACP      | Decanoyl-[Acyl carrier protein]              |
| C100COA      | Decanoyl-Coenzyme A                          |
| C100COAm     | Decanoyl-Coenzyme A (Mitochondria)           |
| C10DACP      | Decanoyl-dehydro-[acyl-carrier protein]      |
| C10DCOAm     | Decanoyl-dehydro-Coenzyme A (Mitochondria)   |
| C10HACP      | Decanoyl-Hydroxy-[acyl-carrier protein]      |
| C10HCOAm     | Decanoyl-Hydroxy-Coenzyme A (Mitochondria)   |
| C10OACP      | Decanoyl-oxo-[acyl-carrier protein]          |
| C10OCOAm     | Decanoyl-oxo-Coenzyme A (Mitochondria)       |
| C120         | Dodecanoic acid                              |
| C120ACP      | Dodecanoyl-[acyl-carrier protein]            |
| C120COA      | Dodecanoyl-Coenzyme A                        |
| C120COAm     | Dodecanoyl-Coenzyme A (Mitochondria)         |
| C12DACP      | Dodecanoyl-dehydro-[acyl-carrier protein]    |
| C12DCOAm     | Dodecanoyl-dehydro-Coenzyme A (Mitochondria) |
| C12HACP      | Dodecanoyl-Hydroxy-[acyl-carrier protein]    |
| C12HCOAm     | Dodecanoyl-Hydroxy-Coenzyme A (Mitochondria) |
| C12OACP      | Dodecanoyl-oxo-[acyl-carrier protein]        |
| C12OCOAm     | Dodecanoyl-oxo-Coenzyme A (Mitochondria)     |
| C140         | Myristic acid                                |
| C140ACP      | Myristoyl-[acyl-carrier protein]             |
| C140COA      | Myristoyl-Coenzyme A                         |
| C140COAm     | Myristoyl-Coenzyme A (Mitochondria)          |
| C14DACP      | Myristoyl-dehydro-[acyl-carrier protein]     |
| C14DCOAm     | Myristoyl-dehydro-Coenzyme A (Mitochondria)  |
| C14HACP      | Myristoyl-Hydroxy-[acyl-carrier protein]     |
| C14HCOAm     | Myristoyl-Hydroxy-Coenzyme A (Mitochondria)  |
| C14OACP      | Myristoyl-oxo-[acyl-carrier protein]         |
| C14OCOAm     | Myristoyl-oxo-Coenzyme A (Mitochondria)      |
| C160         | Palmitate                                    |
| C160ACP      | Hexadecanoyl-[acyl-carrier protein]          |
| C160COA      | Hexadecanoyl-Coenzyme A                      |
| C160COAm     | Hexadecanoyl-Coenzyme A (Mitochondria)       |
| C161         | Palmitic acid                                |
| C161ACP      | Palmitoyl-[acyl-carrier protein]             |
| C161COA      | Palmitoyl-Coenzyme A                         |
| C162         | Hexadecadienoic acid                         |
| C162ACP      | Hexadecadienoic acid-[acyl-carrier protein]  |

| Abbreviation | Full name of metabolite                        |
|--------------|------------------------------------------------|
| C162COA      | Hexadecadienoyl-Coenzyme A                     |
| C16A         | Palmitate_aldehydes                            |
| C16DACP      | Hexadecanoyl-dehydro-[acyl-carrier protein]    |
| C16DCOAm     | Hexadecanoyl-dehydro-Coenzyme A (Mitochondria) |
| C16HACP      | Hexadecanoyl-Hydroxy-[acyl-carrier protein]    |
| C16HCOAm     | Hexadecanoyl-Hydroxy-Coenzyme A (Mitochondria) |
| C16OACP      | Hexadecanoyl-oxo-[acyl-carrier protein]        |
| C16OCOAm     | Hexadecanoyl-oxo-Coenzyme A (Mitochondria)     |
| C180         | Stearate                                       |
| C180ACP      | Stearoyl-[acyl-carrier protein]                |
| C180COA      | Stearoyl-Coenzyme A                            |
| C180COAm     | Stearoyl-Coenzyme A (Mitochondria)             |
| C181         | Oleic acid                                     |
| C181ACP      | Oleoyl-[acyl-carrier protein]                  |
| C181COA      | Oleoyl-Coenzyme A                              |
| C182         | Linoleic acid                                  |
| C182ACP      | Linolenoyl-[acyl-carrier protein]              |
| C182COA      | Linolenoyl-Coenzyme A                          |
| C183         | Octadecatrienoic acid                          |
| C183ACP      | Octadecatrienoic acid-[acyl-carrier protein]   |
| C183COA      | Octadecatrienoic acid-Coenzyme A               |
| C18DACP      | Stearoyl-dehydro-[acyl-carrier protein]        |
| C18DCOAm     | Stearoyl-dehydro-Coenzyme A (Mitochondria)     |
| C18HACP      | Stearoyl-Hydroxy-[acyl-carrier protein]        |
| C18HCOAm     | Stearoyl-Hydroxy-Coenzyme A (Mitochondria)     |
| C18OACP      | Stearoyl-oxo-[acyl-carrier protein]            |
| C18OCOAm     | Stearoyl-oxo-Coenzyme A (Mitochondria)         |
| C40          | Butyric acid                                   |
| C40ACP       | Butyryl-[acyl-carrier protein]                 |
| C40COA       | Butyryl-Coenzyme A                             |
| C40COAm      | Butyryl-Coenzyme A (Mitochondria)              |
| C4DACP       | Butyryl-dehydro-[acyl-carrier protein]         |
| C4DCOAm      | Butyryl-dehydro-Coenzyme A (Mitochondria)      |
| C4HACP       | Butyryl-Hydroxy-[acyl-carrier protein]         |
| C4HCOA       | Butyryl-Hydroxy-Coenzyme A                     |
| C4HCOAm      | Butyryl-Hydroxy-Coenzyme A (Mitochondria)      |
| C60          | Hexanoic acid                                  |
| C60ACP       | Hexanoyl-[acyl-carrier protein]                |
| C60COA       | Hexanoyl-Coenzyme A                            |
| C60COAm      | Hexanoyl-Coenzyme A (Mitochondria)             |
| C6DACP       | Hexanoyl-dehydro-[acyl-carrier protein]        |
| C6DCOAm      | Hexanoyl-dehydro-Coenzyme A (Mitochondria)     |
| C6HACP       | Hexanoyl-Hydroxy-[acyl-carrier protein]        |
| C6HCOAm      | Hexanoyl-Hydroxy-Coenzyme A (Mitochondria)     |
| C6OACP       | Hexanoyl-oxo-[acyl-carrier protein]            |
| C6OCOAm      | Hexanoyl-oxo-Coenzyme A (Mitochondria)         |
| C80          | Octanoic acid                                  |
| C80ACP       | Octanoyl-[acyl-carrier protein]                |
| C80COA       | Octanoyl-Coenzyme A                            |
| C80COAm      | Octanoyl-Coenzyme A (Mitochondria)             |
| C8DACP       | Octanoyl-dehydro-[acyl-carrier protein]        |
| C8DCOAm      | Octanoyl-dehydro-Coenzyme A (Mitochondria)     |
| C8HACP       | Octanoyl-Hydroxy-[acyl-carrier protein]        |

| Abbreviation | Full name of metabolite                               |
|--------------|-------------------------------------------------------|
| C8HCOAm      | Octanoyl-Hydroxy-Coenzyme A (Mitochondria)            |
| C8OACP       | Octanoyl-oxo-[acyl-carrier protein]                   |
| C8OCOAm      | Octanoyl-oxo-Coenzyme A (Mitochondria)                |
| Ca           | Calcium                                               |
| CAASP        | N-Carbamoyl-L-aspartate                               |
| CABM         | Carbamate                                             |
| CAIR         | 1-(5-Phospho-D-ribose)-5-amino-4-imidazolecarboxylate |
| CALH         | 2-(3-Carboxy-3-aminopropyl)-L-histidine               |
| Cam          | Calcium (Mitochondria)                                |
| cAMP         | 3',5'-Cyclic AMP                                      |
| CAP          | Carbamoyl phosphate                                   |
| CAPm         | Carbamoyl phosphate (Mitochondria)                    |
| CAR          | Carnitine                                             |
| CARBO        | carboxylate                                           |
| CARm         | Carnitine (Mitochondria)                              |
| CB15LCT      | Cellobiono-1,5-lactone                                |
| CB15LCTe     | Cellobiono-1,5-lactone (Extracellular)                |
| CBCCP        | Carboxybiotin-carboxyl-carrier-protein                |
| CBHCAP       | 3-Isopropylmalate                                     |
| cCMP         | 3',5'-Cyclic CMP                                      |
| cdAMP        | 3',5'-Cyclic dAMP                                     |
| CDP          | CDP                                                   |
| CDPCHO       | CDPcholine                                            |
| CDPDG        | CDPdiacylglycerol                                     |
| CDPDGm       | CDPdiacylglycerol (Mitochondria)                      |
| CDPETN       | CDPethanolamine                                       |
| CELLOB       | Cellobiose                                            |
| CELLOBe      | Cellobiose (Extracellular)                            |
| CELLOTe      | Cellotriose (Extracellular)                           |
| CELLUe       | Cellulose (Extracellular)                             |
| CER1         | Ceramide                                              |
| CER2         | Dihydroceramide                                       |
| CER3         | Phytoceramide                                         |
| CGLY         | Cys-Gly                                               |
| cGMP         | 3',5'-Cyclic GMP                                      |
| CHCOA        | 6-Carboxyhexanoyl-CoA                                 |
| CHIB         | Chitobiose                                            |
| CHIBe        | Chitobiose (Extracellular)                            |
| CHIT         | Chitin                                                |
| CHITe        | Chitin (Extracellular)                                |
| CHITO        | Chitosan                                              |
| CHITOe       | Chitosan (Extracellular)                              |
| CHO          | Choline                                               |
| CHOe         | Choline (Extracellular)                               |
| CHOR         | Chorismate                                            |
| CHOREOL      | Cholesterol                                           |
| CHOREOLESTR  | Cholesterol Ester                                     |
| CHORESTA     | Cholesta-7,24-dien-3 $\beta$ -ol                      |
| cIMP         | 3',5'-Cyclic IMP                                      |
| CINNAM       | Cinnamate                                             |
| CIT          | Citrate                                               |
| CITe         | Citrate (Extracellular)                               |
| CITm         | Citrate (Mitochondria)                                |

| Abbreviation        | Full name of metabolite                                   |
|---------------------|-----------------------------------------------------------|
| CITR                | L-Citrulline                                              |
| CITRm               | L-Citrulline (Mitochondria)                               |
| CLm                 | Cardiolipin (Mitochondria)                                |
| CML                 | Citramalate                                               |
| CMP                 | CMP                                                       |
| CMPm                | CMP (Mitochondria)                                        |
| CMUSA               | 2-Amino-3-carboxymuconate semialdehyde                    |
| CO2                 | Carbon dioxide                                            |
| CO2e                | Carbon dioxide (Extracellular)                            |
| CO2m                | Carbon dioxide (Mitochondria)                             |
| CO2p                | Carbon dioxide (Peroxisome)                               |
| COA                 | Coenzyme A                                                |
| COAm                | Coenzyme A (Mitochondria)                                 |
| COAp                | Coenzyme A (Peroxisome)                                   |
| CPAD5P              | 1-(2-Carboxyphenylamino)-1-deoxy-D-ribulose 5-phosphate   |
| CPGIII              | Coproporphyrinogen III                                    |
| CPGIII <sub>m</sub> | Coproporphyrinogen III (Mitochondria)                     |
| CRONYLCOA           | crotonyl coA                                              |
| CRONYLCOAm          | Crotonyl CoA (Mitochondria)                               |
| CTP                 | CTP                                                       |
| CTPm                | CTP (Mitochondria)                                        |
| Cu                  | Copper                                                    |
| Cum                 | Copper (Mitochondria)                                     |
| CYMECm              | Cytochrome C (Mitochondria)                               |
| CYNE                | Cyanate                                                   |
| CYS                 | L-Cysteine                                                |
| CYSE                | L-Cysteate                                                |
| CYSm                | L-Cysteine (Mitochondria)                                 |
| CYST                | L-Cystine                                                 |
| CYTD                | Cytidine                                                  |
| CYTS                | Cytosine                                                  |
| CYTSe               | Cytosine (Extracellular)                                  |
| D45PI               | 1-Phosphatidyl-D-myo-inositol 4,5-bisphosphate            |
| D6PGC               | 6-Phospho-D-gluconate                                     |
| D6PGL               | D-Glucono-1,5-lactone 6-phosphate                         |
| D6RP5P              | 2,5-diamino-6-hydroxy-4-(5-phosphoribosylamino)pyrimidine |
| D8RL                | 6,7-dimethyl-8-(1-D-ribityl)lumazine                      |
| DA                  | Deoxyadenosine                                            |
| DADP                | dADP                                                      |
| DAGLY               | Diacylglycerol                                            |
| DALA                | D-Alanine                                                 |
| DAMP                | dAMP                                                      |
| DANNA               | 7,8-diaminononanoate                                      |
| DANNAm              | 7,8-diaminononanoate (Mitochondria)                       |
| DAPRP               | 1,3-Diaminopropane                                        |
| DASP                | D-aspartate                                               |
| DATP                | dATP                                                      |
| DB4P                | 3,4 dihydroxy-2-butanone-4-P                              |
| DC                  | Deoxycytidine                                             |
| DCDP                | dCDP                                                      |
| DCMP                | dCMP                                                      |
| DCTP                | dCTP                                                      |
| DEHXG               | 3-dehydro-2-deoxy-D-gluconate                             |

| Abbreviation | Full name of metabolite                                                     |
|--------------|-----------------------------------------------------------------------------|
| DEORIPi      | 2-deoxy-D-ribose 5-phosphate                                                |
| DEXG         | 2-deoxy-D-gluconate                                                         |
| DG           | Deoxyguanosine                                                              |
| DGDG         | Digalactosyl diglyceride                                                    |
| DGDP         | dGDP                                                                        |
| DGLC         | D-Glucose                                                                   |
| DGLCe        | D-Glucose (Extracellular)                                                   |
| DGLYCODEX    | Debranched glycogen phosphorylase-limited dextrin                           |
| DGMP         | dGMP                                                                        |
| DGPP         | Diacylglycerol pyrophosphate                                                |
| DGTP         | dGTP                                                                        |
| DHDMST       | Dihydrodemethylsterigmatocystin                                             |
| DHF          | Dihydrofolate                                                               |
| DHFm         | Dihydrofolate (Mitochondria)                                                |
| DHMVAm       | (R)-2,3-dihydroxy-3-methylbutanoate (Mitochondria)                          |
| DHOMST       | Dihydro-O-methylsterigmatocystin                                            |
| DHP          | 2-Amino-4-hydroxy-6-(D-erythro-1,2,3-trihydroxypropyl)-7,8-dihydropteridine |
| DHPT         | Dihydropteroate                                                             |
| DHSK         | 3-Dehydroshikimate                                                          |
| DHSP         | Sphinganine 1-phosphate                                                     |
| DHSPH        | 3-Dehydrosphinganine                                                        |
| DHST         | Dihydrosterigmatocystin                                                     |
| DHVALm       | (R)-3-Hydroxy-3-methyl-2-oxobutanoate (Mitochondria)                        |
| DIDIPC       | (S)-dihydrodipicolinate                                                     |
| DIHINDOLE    | Dihydroxyindole                                                             |
| DIHURA       | 5,6-dihydrouracil                                                           |
| DIMEGLY      | N,N-dimethylglycine                                                         |
| DIMEGLYm     | N,N-dimethylglycine (Mitochondria)                                          |
| DIMGP        | D-erythro-1-(Imidazol-4-yl)glycerol 3-phosphate                             |
| DIN          | Deoxyinosine                                                                |
| DMNAD        | Deamido-NAD                                                                 |
| DMPP         | Dimethylallyl diphosphate                                                   |
| DMST         | Demethylsterigmatocystin                                                    |
| DMZYMST      | 4,4-Dimethylzymosterol                                                      |
| DOPA         | L-Dopa                                                                      |
| DOPAe        | L-Dopa (Extracellular)                                                      |
| DOQUI        | Dopaquinone                                                                 |
| DOQUIe       | Dopaquinone (Extracellular)                                                 |
| DOROA        | (S)-Dihydroorotate                                                          |
| DOROAm       | (S)-Dihydroorotate (Mitochondria)                                           |
| DPCOA        | Dephospho-CoA                                                               |
| DPRO         | D-proline                                                                   |
| DPTH         | 2-[3-Carboxy-3-(methylammonio)propyl]-L-histidine                           |
| DQT          | 3-Dehydroquininate                                                          |
| DR1P         | Deoxy-ribose 1-phosphate                                                    |
| DSAM         | S-Adenosylmethioninamine                                                    |
| DT           | Thymidine                                                                   |
| DTB          | Dethiobiotin                                                                |
| DTDP         | dTDP                                                                        |
| DTMP         | dTMP                                                                        |
| DTMPm        | dTMP (Mitochondria)                                                         |



| Abbreviation | Full name of metabolite                               |
|--------------|-------------------------------------------------------|
| DTTP         | dTTP                                                  |
| DU           | Deoxyuridine                                          |
| DUDP         | dUDP                                                  |
| DUMP         | dUMP                                                  |
| DUMPm        | dUMP (Mitochondria)                                   |
| DUTP         | dUTP                                                  |
| E4P          | D-Erythrose 4-phosphate                               |
| ECYSm        | [Enzyme]-cysteine (Mitochondria)                      |
| EPST         | Episterol                                             |
| ERGOSE       | Sterol ester                                          |
| ERGOST       | Ergosterol                                            |
| ERIDICOL     | Eriodictyol                                           |
| ERTEOL       | Ergosta-5,7,22,24(28)-tetraenol                       |
| ERTROL       | Ergosta-5,7,24(28)-trienol                            |
| ESULFCYSm    | [Enzyme]-S-sulfanylcysteine (Mitochondria)            |
| ETH          | Ethanol                                               |
| ETHe         | Ethanol (Extracellular)                               |
| ETHm         | Ethanol (Mitochondria)                                |
| F26P         | D-Fructose 2,6-bisphosphate                           |
| F6P          | Beta-D-Fructose 6-phosphate                           |
| FAD          | FAD                                                   |
| FADH2m       | FADH2 (Mitochondria)                                  |
| FADm         | FAD (Mitochondria)                                    |
| FALD         | Formaldehyde                                          |
| FALDm        | Formaldehyde (Mitochondria)                           |
| FDP          | Beta-D-Fructose 1,6-bisphosphate                      |
| FERIm        | Ferricytochrome C (Mitochondria)                      |
| FEROm        | Ferrocyclochrome C (Mitochondria)                     |
| FERRIN       | Ferreirin                                             |
| FEST         | Fecosterol                                            |
| FGAM         | 2-(Formamido)-N1-(5'-phosphoribosyl)acetamidine       |
| FGAR         | 5'-Phosphoribosyl-N-formylglycinamide                 |
| FGT          | S-Formylglutathione                                   |
| FKYN         | L-Formylkynurenine                                    |
| FMN          | FMN                                                   |
| FMNe         | FMN (Extracellular)                                   |
| FMNm         | FMN (Mitochondria)                                    |
| FOFMETm      | N-formylmethionyl-tRNA <sup>fMet</sup> (Mitochondria) |
| FOR          | Formate                                               |
| FORe         | Formate (Extracellular)                               |
| FORGLU       | N-formimidoyl-L-glutamate                             |
| FORm         | Formate (Mitochondria)                                |
| FORMIE       | Formamide                                             |
| FPP          | Trans,trans-Farnesyl diphosphate                      |
| FRU          | D-Fructose                                            |
| FRUe         | D-Fructose (Extracellular)                            |
| FRUTN        | D-fructuronate                                        |
| FTHF         | 10-Formyltetrahydrofolate                             |
| FTHFm        | 10-Formyltetrahydrofolate (Mitochondria)              |
| FUACAC       | 4-Fumarylacetoacetate                                 |
| FUM          | Fumarate                                              |
| FUMe         | Fumarate (Extracellular)                              |
| FUMm         | Fumarate (Mitochondria)                               |

| Abbreviation | Full name of metabolite                   |
|--------------|-------------------------------------------|
| G            | D-Glycerate                               |
| G1P          | Alpha-D-Glucose 1-phosphate               |
| G6P          | Alpha-D-Glucose 6-phosphate               |
| GA6P         | D-Glucosamine 6-phosphate                 |
| GABA         | 4-Aminobutanoate                          |
| GABAE        | 4-Aminobutanoate (Extracellular)          |
| GABAL        | 4-Aminobutyraldehyde                      |
| GABALm       | 4-Aminobutyraldehyde (Mitochondria)       |
| GABAm        | 4-Aminobutanoate (Mitochondria)           |
| GACER        | Galactocyl ceramide                       |
| GAL1P        | Alpha-D-Galactose 1-phosphate             |
| GALN14LAC    | D-Galactono-1,4-lactone                   |
| GALNT        | D-Galactonate                             |
| GALOL        | Galactitol                                |
| GALUNT       | D-Galacturonate                           |
| GALUNTe      | D-Galacturonate (Extracellular)           |
| GAR          | 5'-Phosphoribosylglycinamide              |
| GC           | Gamma-L-Glutamyl-L-cysteine               |
| GCYLCR       | D-glucosyl-ceramide                       |
| GDP          | GDP                                       |
| GDPm         | GDP (Mitochondria)                        |
| GDPMAN       | GDPmannose                                |
| GGPP         | Geranylgeranyl diphosphate                |
| GL           | Glycerol                                  |
| GL3P         | Sn-Glycerol 3-phosphate                   |
| GL3Pm        | Sn-Glycerol 3-phosphate (Mitochondria)    |
| GLAC         | D-Galactose                               |
| GLACe        | D-Galactose (Extracellular)               |
| GLAL         | Glycoaldehyde                             |
| GLALp        | Glycoaldehyde (Peroxisome)                |
| GLC          | Alpha-D-Glucose                           |
| GLCe         | Alpha-D-Glucose (Extracellular)           |
| GLCN         | D-Glucosamine                             |
| GLCN15LAC    | D-Glucono-1,5-lactone                     |
| GLCN15LACe   | D-Glucono-1,5-lactone (Extracellular)     |
| GLCNe        | D-Glucosamine (Extracellular)             |
| GLCNT        | D-Gluconate                               |
| GLCNTe       | D-Gluconate (Extracellular)               |
| GLe          | Glycerol (Extracellular)                  |
| GLN          | L-Glutamine                               |
| GLNe         | L-Glutamine (Extracellular)               |
| GLNm         | L-Glutamine (Mitochondria)                |
| GLTCOA       | Glutaryl CoA                              |
| GLU          | L-Glutamate                               |
| GLU1SAL      | Glutamate-1-semialdehyde                  |
| GLUCN        | D-glucuronate                             |
| GLUCRE       | D-glucurononate                           |
| GLUe         | L-Glutamate (Extracellular)               |
| GLUGSAL      | L-Glutamate 5-semialdehyde                |
| GLUGSALm     | L-Glutamate 5-semialdehyde (Mitochondria) |
| GLUm         | L-Glutamate (Mitochondria)                |
| GLUP         | Alpha-D-Glutamyl phosphate                |
| GLX          | Glyoxylate                                |

| Abbreviation | Full name of metabolite                             |
|--------------|-----------------------------------------------------|
| GLXm         | Glyoxylate (Mitochondria)                           |
| GLXp         | Glyoxylate (Peroxisome)                             |
| GLY          | Glycine                                             |
| GLYAL        | D-Glyceraldehyde                                    |
| GLYBET       | Glycine betaine                                     |
| GLYCEROCHO   | Glycerophosphocholine                               |
| GLYCODEX     | Glycogen phosphorylase-limited dextrin              |
| GLYCOGEN     | Glycogen                                            |
| GLYCOGENe    | Glycogen (Extracellular)                            |
| GLYCOLAp     | Glycolate (Peroxisome)                              |
| GLYe         | Glycine (Extracellular)                             |
| GLYm         | Glycine (Mitochondria)                              |
| GLYN         | Glycerone                                           |
| GLYNIN       | Glycogenin                                          |
| GLYTRNA      | Glycyl-tRNA                                         |
| GMP          | GMP                                                 |
| GN           | Guanine                                             |
| GNe          | Guanine (Extracellular)                             |
| Gp           | D-Glycerate (Peroxisome)                            |
| GPP          | Geranyl diphosphate                                 |
| GSN          | Guanosine                                           |
| GTP          | GTP                                                 |
| GTPm         | GTP (Mitochondria)                                  |
| H            | Hydrogen                                            |
| H_PO         | Proton                                              |
| H_PO_m       | Proton (Mitochondria)                               |
| H2O          | Water                                               |
| H2O2         | Hydrogen peroxide                                   |
| H2O2e        | Hydrogen peroxide (Extracellular)                   |
| H2O2m        | Hydrogen peroxide (Mitochondria)                    |
| H2O2p        | Hydrogen peroxide (Peroxisome)                      |
| H2Oe         | Water (Extracellular)                               |
| H2Om         | Water (Mitochondria)                                |
| H2Op         | Water (Peroxisome)                                  |
| H2S          | Hydrogen sulfide                                    |
| H2Sm         | Hydrogen sulfide (Mitochondria)                     |
| H2SO3        | Sulfite                                             |
| H2SO3e       | Sulfite (Extracellular)                             |
| H3MCOA       | (S)-3-Hydroxy-3-methylglutaryl-CoA                  |
| H3MCOAm      | (S)-3-Hydroxy-3-methylglutaryl-CoA (Mitochondria)   |
| HACN         | But-1-ene-1,2,4-tricarboxylate                      |
| HACNm        | But-1-ene-1,2,4-tricarboxylate (Mitochondria)       |
| HAN          | 3-Hydroxyanthranilate                               |
| HAVN         | 5-Hydroxyaverantin                                  |
| HCIT         | 2-Hydroxybutane-1,2,4-tricarboxylate                |
| HCITm        | 2-Hydroxybutane-1,2,4-tricarboxylate (Mitochondria) |
| HCO3         | HCO <sub>3</sub>                                    |
| HCO3m        | HCO <sub>3</sub> (Mitochondria)                     |
| HCTX         | Holo-carboxylase                                    |
| HCYS         | L-Homocysteine                                      |
| He           | Hydrogen (Extracellular)                            |
| HEME_Am      | Heme A (Mitochondria)                               |
| HEME_Om      | Heme O (Mitochondria)                               |

| Abbreviation           | Full name of metabolite                              |
|------------------------|------------------------------------------------------|
| HHTRNA                 | L-Histidyl-tRNA                                      |
| HICIT                  | Homoisocitrate                                       |
| HICITm                 | Homoisocitrate (Mitochondria)                        |
| HIS                    | L-Histidine                                          |
| HISe                   | L-Histidine (Extracellular)                          |
| HISOL                  | L-Histidinol                                         |
| HISOLP                 | L-Histidinol phosphate                               |
| HIURTE                 | 3-hydroxy-isobutyrate                                |
| HIURTEp                | 3-hydroxy-isobutyrate (Peroxisome)                   |
| HKYN                   | 3-Hydroxykynurenine                                  |
| HKYNm                  | 3-Hydroxykynurenine (Mitochondria)                   |
| Hm                     | Hydrogen (Mitochondria)                              |
| HMTB                   | Hydroxymethylbilane                                  |
| HNO2                   | Nitrite                                              |
| HNO2m                  | Nitrite (Mitochondria)                               |
| HNO3                   | Nitrate                                              |
| HNO3e                  | Nitrate (Extracellular)                              |
| HOMOGEN                | Homogentisate                                        |
| HPRO                   | Trans-4-Hydroxy-L-proline                            |
| HPROm                  | Trans-4-Hydroxy-L-proline (Mitochondria)             |
| HPYRp                  | Hydroxypyruvate (Peroxisome)                         |
| HSER                   | L-Homoserine                                         |
| HX                     | HX                                                   |
| HYGTA                  | S-(hydroxymethyl)glutathione                         |
| HYISOCOA               | 3-hydroxy-isobutyryl COA                             |
| HYISOCOA <sub>m</sub>  | 3-hydroxy-isobutyryl COA (Mitochondria)              |
| HYISORATE <sub>m</sub> | 3-hydroxy-isobutyrate (Mitochondria)                 |
| HYXN                   | Hypoxanthine                                         |
| IAC                    | Indole-3-acetate                                     |
| IAD                    | Indole-3-acetamide                                   |
| ICIT                   | Isocitrate                                           |
| ICITe                  | Isocitrate (Extracellular)                           |
| ICIT <sub>m</sub>      | Isocitrate (Mitochondria)                            |
| ICIT <sub>p</sub>      | Isocitrate (Peroxisome)                              |
| IDP                    | IDP                                                  |
| IDP <sub>m</sub>       | IDP (Mitochondria)                                   |
| IGP                    | Indoleglycerol phosphate                             |
| IGST                   | 4,4-Dimethylcholesta-8,14,24-trienol                 |
| IIMZYMST               | Intermediate_Methylzymosterol_II                     |
| IIZYMST                | Intermediate_Zymosterol_II                           |
| ILE                    | L-Isoleucine                                         |
| ILEe                   | L-Isoleucine (Extracellular)                         |
| ILE <sub>m</sub>       | L-Isoleucine (Mitochondria)                          |
| IMACP                  | 3-(Imidazol-4-yl)-2-oxopropyl phosphate              |
| IMIPRO                 | (S)-3-(5-oxo-4,5-dihydro-3H-imidazol-4-yl)propanoate |
| IMP                    | IMP                                                  |
| IMZYMST                | Intermediate_Methylzymosterol_I                      |
| INS                    | Inosine                                              |
| IPC                    | Inositol phosphorylceramide                          |
| IPN                    | Isopenicillin N                                      |
| IPPMAL                 | 2-Isopropylmalate                                    |
| IPPMAL <sub>m</sub>    | 2-Isopropylmalate (Mitochondria)                     |
| IPPP                   | Isopentenyl diphosphate                              |

| <b>Abbreviation</b>    | <b>Full name of metabolite</b>                      |
|------------------------|-----------------------------------------------------|
| ISOBUCOA               | Isobutyryl coA                                      |
| ISOVACOA               | Isovaleryl-CoA                                      |
| ISOVACOA <sub>m</sub>  | Isovaleryl-CoA (Mitochondria)                       |
| ITP                    | ITP                                                 |
| ITP <sub>m</sub>       | ITP (Mitochondria)                                  |
| IZYMST                 | Intermediate_Zymosterol_I                           |
| K                      | Potassium                                           |
| Ke                     | Potassium (Extracellular)                           |
| KEMYOI                 | 2-keto-myo-inositol                                 |
| K <sub>m</sub>         | Potassium (Mitochondria)                            |
| KYN                    | L-Kynurenine                                        |
| KYN <sub>m</sub>       | L-Kynurenine (Mitochondria)                         |
| LAC                    | D-Lactate                                           |
| LACAL                  | D-Lactaldehyde                                      |
| LACAL <sub>m</sub>     | (S)-Lactaldehyde (Mitochondria)                     |
| LACe                   | D-Lactate (Extracellular)                           |
| LAC <sub>m</sub>       | (R)-Lactate (Mitochondria)                          |
| LACT                   | Lactose                                             |
| LACTe                  | Lactose (Extracellular)                             |
| LAlaTRNA               | L-alanyl-tRNA                                       |
| LAOL                   | L-Arabitol                                          |
| LARAB                  | L-Arabinose                                         |
| LARABe                 | L-Arabinose (Extracellular)                         |
| LCysTRNA               | L-cysteinyl-tRNA                                    |
| LEU                    | L-Leucine                                           |
| LEUe                   | L-Leucine (Extracellular)                           |
| LEU <sub>m</sub>       | L-Leucine (Mitochondria)                            |
| LGALNT                 | L-Galactonate                                       |
| LGLNTRNA               | L-glutaminy-tRNA                                    |
| LGLNTRNA <sub>m</sub>  | L-glutaminy-tRNA (Mitochondria)                     |
| LGLUTRNA               | L-glutamyl-tRNA                                     |
| LGLUTRNA <sub>m</sub>  | L-glutamyl-tRNA (Mitochondria)                      |
| LGLYAL                 | L-Glyceraldehyde                                    |
| LGT                    | (R)-S-Lactoylglutathione                            |
| LILEUTRNA              | L-isoleucine-tRNA                                   |
| LILEUTRNA <sub>m</sub> | L-isoleucine-tRNA (Mitochondria)                    |
| LIPOM                  | Lipoamide (Mitochondria)                            |
| LLAC                   | L-Lactate                                           |
| LLACe                  | L-Lactate (Extracellular)                           |
| LLAC <sub>m</sub>      | (S)-Lactate (Mitochondria)                          |
| LLCT                   | L-Cystathionine                                     |
| LLDACV                 | N-[5-amino-5-carboxypentanoyl]-L-cysteinyl-D-valine |
| LLeuTRNA               | L-leucyl-tRNA                                       |
| LLTRNA                 | L-Lysyl-tRNA                                        |
| LMETTRNA               | L-methionyl-tRNA                                    |
| LMETTRNA <sub>m</sub>  | L-methionyl-tRNA (Mitochondria)                     |
| LNST                   | Lanosterol                                          |
| LPAA                   | Lysophosphatidylamine                               |
| LPC                    | Lysophosphatidylcholine                             |
| LPDME                  | Lysophosphatidyl-N-dimethylethanolamine             |
| LPE                    | Lysophosphatidylethanolamine                        |
| LPG                    | Lysophosphatidylglycerol                            |
| LPhetrNA               | L-phenylalanyl-tRNA                                 |

| Abbreviation           | Full name of metabolite                       |
|------------------------|-----------------------------------------------|
| LPMME                  | Lysophosphatidyl-N-methylethanolamine         |
| LPROTRNA               | L-prolyl-tRNA                                 |
| LPS                    | Lysophosphatidylserine                        |
| LRL                    | L-Ribulose                                    |
| LRL5P                  | L-ribulose 5-phosphate                        |
| LRLe                   | L-Ribulose (Extracellular)                    |
| LSECTRNA               | L-selenocysteinyl-tRNA                        |
| LSERTRNA               | L-seryl-tRNA                                  |
| LTHETRNA               | L-threonyl-tRNA                               |
| LTHETRNA <sub>m</sub>  | L-threonyl-tRNA (Mitochondria)                |
| LTST                   | Lathosterol                                   |
| LTyrTRNA               | L-tyrosyl-tRNA                                |
| LTyrTRNA <sub>m</sub>  | L-tyrosyl-tRNA (Mitochondria)                 |
| LValTRNA               | L-valyl-tRNA <sup>Val</sup>                   |
| LXUL                   | L-Xylulose                                    |
| LXULe                  | L-Xylulose (Extracellular)                    |
| LYS                    | L-Lysine                                      |
| LYSe                   | L-Lysine (Extracellular)                      |
| MACAC                  | Maleylacetoacetate                            |
| MAGLY                  | Monoacylglycerol                              |
| MAL                    | (S)-Malate                                    |
| MALACP                 | Malonyl-[acyl-carrier protein]                |
| MALCOA                 | Malonyl Coenzyme A                            |
| MALe                   | (S)-Malate (Extracellular)                    |
| MAL <sub>m</sub>       | (S)-Malate (Mitochondria)                     |
| MAL <sub>p</sub>       | (S)-Malate (Peroxisome)                       |
| MAN                    | D-Mannose                                     |
| MAN1P                  | Alpha-D-Mannose 1-phosphate                   |
| MAN6P                  | D-Mannose 6-phosphate                         |
| MANe                   | D-Mannose (Extracellular)                     |
| MANNAN                 | Mannan                                        |
| MANNANe                | Mannan (Extracellular)                        |
| MANOE                  | D-mannonate                                   |
| MCECOA                 | 2-methylaceto-acetyl CoA                      |
| MCRCOA                 | 2-methylbut-2-enoyl-CoA                       |
| MCRCOA <sub>m</sub>    | 2-methylbut-2-enoyl-CoA (Mitochondria)        |
| MELI                   | Melibiose                                     |
| MELIe                  | Melibiose (Extracellular)                     |
| MENIN                  | Melanin                                       |
| MESC                   | Mesaconate                                    |
| MET                    | L-Methionine                                  |
| METBU <sub>2</sub> COA | 2-methylbutyryl coA                           |
| METBY <sub>2</sub> COA | 2-methyl-2-hydroxybutyryl coA                 |
| METe                   | L-Methionine (Extracellular)                  |
| METHF                  | 5,10-Methenyltetrahydrofolate                 |
| METHF <sub>m</sub>     | 5,10-Methenyltetrahydrofolate (Mitochondria)  |
| METHOL                 | Methanol                                      |
| METHOLe                | Methanol (Extracellular)                      |
| METTHF                 | 5,10-Methylenetetrahydrofolate                |
| METTHF <sub>m</sub>    | 5,10-Methylenetetrahydrofolate (Mitochondria) |
| MGCOA                  | 3-methylglutaconyl-CoA                        |
| MGCOA <sub>m</sub>     | 3-methylglutaconyl-CoA (Mitochondria)         |
| MGDG                   | Monogalactosyl diglyceride                    |

| Abbreviation | Full name of metabolite                            |
|--------------|----------------------------------------------------|
| MHIS         | N(pai)-Methyl-L-histidine                          |
| MI1P         | 1L-myo-Inositol 1-phosphate                        |
| MIP2C        | Inositol-mannose-P-inositol-P-ceramide             |
| MIPC         | Mannose-inositol-P-ceramide                        |
| MLT          | Maltose                                            |
| MLTe         | Maltose (Extracellular)                            |
| MLTIOSE      | Maltotriose                                        |
| MLTOSE       | Maltotetraose                                      |
| MMCOA        | (S)-methylmalonyl-CoA                              |
| MMSHYm       | 2-methyl-3-oxopropanoate (Mitochondria)            |
| MNT          | D-Mannitol                                         |
| MNT1P        | D-Mannitol 1-phosphate                             |
| MNTe         | D-Mannitol (Extracellular)                         |
| MTHF         | 5-Methyltetrahydrofolate                           |
| MTHFm        | 5-Methyltetrahydrofolate (Mitochondria)            |
| MTHGXL       | Methylglyoxal                                      |
| MTHGXLm      | Methylglyoxal (Mitochondria)                       |
| MTHPTGLU     | 5-Methyltetrahydropteroyltri-L-glutamate           |
| MVL          | (R)-Mevalonate                                     |
| MYOBISPI     | Myo-inositol 1,4-bisphosphate                      |
| MYOCYPI      | 1D-myo-inositol 1,2-cyclic phosphate               |
| MYOI         | Myo-Inositol                                       |
| MYOIe        | Myo-Inositol (Extracellular)                       |
| MZYMST       | 4-Methylzymsterol                                  |
| N4HBZ        | 3-octaprenyl-4-hydroxybenzoate                     |
| Na           | Sodium                                             |
| NAD          | NAD <sup>+</sup>                                   |
| NADH         | NADH                                               |
| NADHm        | NADH (Mitochondria)                                |
| NADHp        | NADH (Peroxisome)                                  |
| NADm         | NAD <sup>+</sup> (Mitochondria)                    |
| NADP         | NAD <sup>+</sup> (Peroxisome)                      |
| NADPH        | NADPH                                              |
| NADPHm       | NADPH (Mitochondria)                               |
| NADPHp       | NADPH (Peroxisome)                                 |
| NADPm        | NADP <sup>+</sup> (Mitochondria)                   |
| NADPp        | NADP <sup>+</sup> (Peroxisome)                     |
| Nae          | Sodium (Extracellular)                             |
| NAG          | N-Acetyl-D-glucosamine                             |
| NAGA1P       | N-Acetyl-D-glucosamine 1-phosphate                 |
| NAGA6P       | N-Acetyl-D-glucosamine 6-phosphate                 |
| NAGe         | N-Acetyl-D-glucosamine (Extracellular)             |
| NAGLUm       | N-Acetyl-L-glutamate (Mitochondria)                |
| NAGLUPm      | N-Acetyl-L-glutamate 5-phosphate (Mitochondria)    |
| NAGLUSm      | N-Acetyl-L-glutamate 5-semialdehyde (Mitochondria) |
| Nam          | Sodium (Mitochondria)                              |
| NAORN        | N <sup>2</sup> -Acetyl-L-ornithine                 |
| NAORNm       | N <sup>2</sup> -Acetyl-L-ornithine (Mitochondria)  |
| NCACE        | Naringenin chalcone                                |
| NGEN         | Naringenin                                         |
| NH3          | Ammonia                                            |
| NH3e         | Ammonia (Extracellular)                            |
| NH3m         | Ammonia (Mitochondria)                             |

| Abbreviation | Full name of metabolite                           |
|--------------|---------------------------------------------------|
| NH4OH        | Ammonium hydroxide                                |
| NICD         | Nicotinamide                                      |
| NICDm        | Nicotinamide (Mitochondria)                       |
| NICNATE      | Nicotinate                                        |
| NICNATEm     | Nicotinate (Mitochondria)                         |
| NICNUCLE     | Nicotinate D-ribonucleotide                       |
| NITE         | Nitriles                                          |
| NITROPRO     | 2-nitropropane                                    |
| NITROPROm    | 2-nitropropane (Mitochondria)                     |
| NMNm         | Nicotinamide mononucleotide (Mitochondria)        |
| NO           | Nitric oxide                                      |
| NOR          | Norsolorinic acid                                 |
| NPP          | Octaprenyl diphosphate                            |
| NPRAN        | N-(5-Phospho-D-ribose)anthranilate                |
| O2           | Oxygen                                            |
| O2e          | Oxygen (Extracellular)                            |
| O2m          | Oxygen (Mitochondria)                             |
| O2p          | Oxygen (Peroxisome)                               |
| OA           | Oxaloacetate                                      |
| O Ae         | Oxaloacetate (Extracellular)                      |
| OAHSER       | O-Acetyl-L-homoserine                             |
| OAm          | Oxaloacetate (Mitochondria)                       |
| OAp          | Oxaloacetate (Peroxisome)                         |
| OBUT         | 2-Oxobutanoate                                    |
| OBUTm        | 2-Oxobutanoate (Mitochondria)                     |
| OGT          | Oxidized glutathione                              |
| OICAP        | 3-Carboxy-4-methyl-2-oxopentanoate                |
| OICAPm       | 3-Carboxy-4-methyl-2-oxopentanoate (Mitochondria) |
| OIVAL        | (R)-2-Oxoisovalerate                              |
| OIVALm       | (R)-2-Oxoisovalerate (Mitochondria)               |
| OMP          | Orotidine 5'-phosphate                            |
| OMST         | O-methylsterigmatocystin                          |
| OMVAL        | 2-keto-3-methyl-valerate                          |
| OMVALm       | 2-keto-3-methyl-valerate (Mitochondria)           |
| ORN          | L-Ornithine                                       |
| ORNm         | L-Ornithine (Mitochondria)                        |
| OROA         | Orotate                                           |
| OROAm        | Orotate (Mitochondria)                            |
| OSLHSER      | O-Succinyl-L-homoserine                           |
| OTHIO        | Oxidized thioredoxin                              |
| OTHIOm       | Oxidized thioredoxin (Mitochondria)               |
| OXAL         | Oxalate                                           |
| OXALe        | Oxalate (Extracellular)                           |
| OXGLY        | Oxaloglycolate                                    |
| P5C          | (S)-1-Pyrroline-5-carboxylate                     |
| P5Cm         | (S)-1-Pyrroline-5-carboxylate (Mitochondria)      |
| PA           | Phosphatidate                                     |
| PAA          | Phosphatidylamine                                 |
| PABA         | 4-Aminobenzoate                                   |
| PAC          | Phenylacetic acid                                 |
| PAD          | 2-Phenylacetamide                                 |



| Abbreviation | Full name of metabolite                              |
|--------------|------------------------------------------------------|
| PADm         | 2-Phenylacetamide (Mitochondria)                     |
| PAm          | Phosphatidate (Mitochondria)                         |
| PANT         | (R)-Pantoate                                         |
| PANTm        | (R)-Pantoate (Mitochondria)                          |
| PAP          | Adenosine 3',5'-bisphosphate                         |
| PAPm         | Adenosine 3',5'-bisphosphate (Mitochondria)          |
| PAPS         | 3'-Phosphoadenylylsulfate                            |
| PC           | Phosphatidylcholine                                  |
| PCACE        | Protocatechuate                                      |
| PCHO         | Choline phosphate                                    |
| PDME         | Phosphatidyl-N-dimethylethanolamine                  |
| PDXAL        | Pyridoxal                                            |
| PDXAM        | Pyridoxamine                                         |
| PDXAM5PI     | Pyridoxamine-5-phosphate                             |
| PDXI         | Pyridoxine                                           |
| PDXI5PI      | Pyridoxine-5-phosphate                               |
| PDXL5PI      | Pyridoxal-5-phosphate                                |
| PE           | Phosphatidylethanolamine                             |
| PEm          | Phosphatidylethanolamine (Mitochondria)              |
| PEN          | Penicillin                                           |
| PENACID      | Penicillic acid                                      |
| PENN         | Penicillin N                                         |
| PEP          | Phosphoenolpyruvate                                  |
| PEPm         | Phosphoenolpyruvate (Mitochondria)                   |
| PETHM        | Ethanolamine phosphate                               |
| PG           | Phosphatidylglycerol                                 |
| PGm          | Phosphatidylglycerol (Mitochondria)                  |
| PGPm         | Phosphatidylglycerophosphate (Mitochondria)          |
| PHAC         | Phenylacetate                                        |
| PHACAL       | Phenylacetaldehyde                                   |
| PHACALm      | Phenylacetaldehyde (Mitochondria)                    |
| PHAC-COA     | Phenylacetyl-CoA                                     |
| PHC          | L-1-Pyrroline-3-hydroxy-5-carboxylate                |
| PHCm         | L-1-Pyrroline-3-hydroxy-5-carboxylate (Mitochondria) |
| PHE          | L-Phenylalanine                                      |
| PHEe         | L-Phenylalanine (Extracellular)                      |
| PHEETHAL     | Phenylethylalcohol                                   |
| PHEETHALm    | Phenylethylalcohol (Mitochondria)                    |
| PHEm         | L-Phenylalanine (Mitochondria)                       |
| PHMEM        | Protoheme (Mitochondria)                             |
| PHEN         | Prephenate                                           |
| PHP          | 3-Phosphonooxypyruvate                               |
| PHPYR        | Phenylpyruvate                                       |
| PHSER        | O-Phospho-L-homoserine                               |
| PHSP         | Phytosphingosine 1-phosphate                         |
| PI           | Orthophosphate                                       |
| PIe          | Orthophosphate (Extracellular)                       |
| PIm          | Orthophosphate (Mitochondria)                        |
| PINS         | 1-Phosphatidyl-D-myo-inositol                        |
| PINS4P       | 1-Phosphatidyl-1D-myo-inositol 4-phosphate           |
| PINSP        | 1-Phosphatidyl-1D-myo-inositol 3-phosphate           |
| PMME         | Phosphatidyl-N-methylethanolamine                    |
| PMVL         | (R)-5-Phosphomevalonate                              |

| Abbreviation       | Full name of metabolite                                                                          |
|--------------------|--------------------------------------------------------------------------------------------------|
| PNTO               | (R)-Pantothenate                                                                                 |
| PPBG               | Porphobilinogen                                                                                  |
| PPGIXm             | Protoporphyrinogen IX                                                                            |
| ppGpp              | ppGpp                                                                                            |
| PPI                | Pyrophosphate                                                                                    |
| PPI <sub>m</sub>   | Pyrophosphate (Mitochondria)                                                                     |
| PPI <sub>p</sub>   | Pyrophosphate (Peroxisome)                                                                       |
| PPMAL              | 2-Isopropylmaleate                                                                               |
| PPMVL              | (R)-5-Diphosphomevalonate                                                                        |
| pppGpp             | pppGpp                                                                                           |
| PPRIXm             | Protoporphyrin IX (Mitochondria)                                                                 |
| PRAM               | 5-Phosphoribosylamine                                                                            |
| PRBAMP             | N1-(5-Phospho-D-ribosyl)-AMP                                                                     |
| PRBATP             | N1-(5-Phospho-D-ribosyl)-ATP                                                                     |
| PRECOR             | Precorrin                                                                                        |
| PRFICA             | 1-(5'-Phosphoribosyl)-5-formamido-4-imidazolecarboxamide                                         |
| PRFP               | 5-(5-Phospho-D-ribosylaminoformimino)-1-(5-phosphoribosyl)-imidazole-4-carboxamide               |
| PRLP               | N-(5'-Phospho-D-1'-ribulositylformimino)-5-amino-1-(5"-phospho-D-ribosyl)-4-imidazolecarboxamide |
| PRO                | L-Proline                                                                                        |
| PRO <sub>e</sub>   | L-Proline (Extracellular)                                                                        |
| PRO <sub>m</sub>   | L-Proline (Mitochondria)                                                                         |
| PROP               | Propanoate                                                                                       |
| PROPCOA            | Propanoyl-CoA                                                                                    |
| PROPCOAm           | Propanoyl-CoA (Mitochondria)                                                                     |
| PROPCOAp           | Propanoyl-CoA (Peroxisome)                                                                       |
| PROPe              | Propanoate (Extracellular)                                                                       |
| PROP <sub>m</sub>  | Propanoate (Mitochondria)                                                                        |
| PRPP               | 5-Phospho-alpha-D-ribose 1-diphosphate                                                           |
| PS                 | Phosphatidylserine                                                                               |
| PS <sub>m</sub>    | Phosphatidylserine (Mitochondria)                                                                |
| PSPH               | Phytosphingosine                                                                                 |
| PTATE <sub>e</sub> | Pectate (Extracellular)                                                                          |
| PTRSC              | Putrescine                                                                                       |
| PTRSC <sub>m</sub> | Putrescine (Mitochondria)                                                                        |
| PURI5P             | Pseudouridine 5'-phosphate                                                                       |
| PYR                | Pyruvate                                                                                         |
| PYRe               | Pyruvate (Extracellular)                                                                         |
| PYR <sub>m</sub>   | Pyruvate (Mitochondria)                                                                          |
| PYRp               | Pyruvate (Peroxisome)                                                                            |
| PYTE               | Phytate                                                                                          |
| QA                 | Quinolate                                                                                        |
| QH2 <sub>m</sub>   | Ubiquinol (Mitochondria)                                                                         |
| Qm                 | Ubiquinone (Mitochondria)                                                                        |
| QT                 | Quinate                                                                                          |
| R1P                | D-Ribose 1-phosphate                                                                             |
| R5P                | D-Ribose 5-phosphate                                                                             |
| R5P <sub>m</sub>   | D-Ribose 5-phosphate (Mitochondria)                                                              |
| RAFe               | Raffinose (Extracellular)                                                                        |
| RGT                | Glutathione                                                                                      |
| RIB                | D-Ribose                                                                                         |
| RIB <sub>e</sub>   | D-Ribose (Extracellular)                                                                         |

| <b>Abbreviation</b> | <b>Full name of metabolite</b>                                   |
|---------------------|------------------------------------------------------------------|
| RIBFLAV             | Riboflavin                                                       |
| RIBFLAVe            | Riboflavin (Extracellular)                                       |
| RL                  | D-Ribulose                                                       |
| RL5P                | D-Ribulose 5-phosphate                                           |
| RLe                 | D-Ribulose (Extracellular)                                       |
| RTHIO               | Reduced thioredoxin                                              |
| RTHIOm              | Reduced thioredoxin (Mitochondria)                               |
| RX                  | RX                                                               |
| S                   | Sulfur                                                           |
| S23E                | (S)-2,3-Epoxy-squalene                                           |
| S7P                 | Sedoheptulose 7-phosphate                                        |
| SACP                | N6-(L-1,3-Dicarboxypropyl)-L-lysine                              |
| SAH                 | S-Adenosyl-L-homocysteine                                        |
| SAHm                | S-Adenosyl-L-homocysteine (Mitochondria)                         |
| SAICAR              | 1-(5'-Phosphoribosyl)-5-amino-4-(N-succinocarboxamide)-imidazole |
| SAM                 | S-Adenosyl-L-methionine                                          |
| SAMm                | S-Adenosyl-L-methionine (Mitochondria)                           |
| SAMOB               | S-adenosyl-4-methylthio-2-oxobutanoate                           |
| SAMOBm              | S-adenosyl-4-methylthio-2-oxobutanoate (Mitochondria)            |
| SAPm                | S-Aminomethyl-dihydro-lipoylprotein (Mitochondria)               |
| SARC                | Sarcosine                                                        |
| SARCM               | Sarcosine (Mitochondria)                                         |
| SCTLE               | Scytalone                                                        |
| SER                 | L-Serine                                                         |
| SERe                | L-Serine (Extracellular)                                         |
| SERm                | L-Serine (Mitochondria)                                          |
| SHCR                | Sirohydrochlorin                                                 |
| SIHM                | Siroheme                                                         |
| SLF                 | Sulfate                                                          |
| SLFe                | Sulfate (Extracellular)                                          |
| SME                 | Shikimate                                                        |
| SME3P               | Shikimate-3-phosphate                                            |
| SNPI                | Selenophosphate                                                  |
| SOR                 | L-Sorbose                                                        |
| SORe                | L-Sorbose (Extracellular)                                        |
| SOT                 | D-Sorbitol                                                       |
| SOTe                | D-Sorbitol (Extracellular)                                       |
| SPH                 | Sphinganine                                                      |
| SPMYLIN             | Sphingomyelin                                                    |
| SPRM                | Spermine                                                         |
| SPRMD               | Spermidine                                                       |
| SQL                 | Squalene                                                         |
| ST                  | Sterigmatocystin                                                 |
| STAR                | Starch                                                           |
| STARe               | Starch (Extracellular)                                           |
| SUCC                | Succinate                                                        |
| SUCCe               | Succinate (Extracellular)                                        |
| SUCCm               | Succinate (Mitochondria)                                         |
| SUCCOAm             | Succinyl coenzyme A (Mitochondria)                               |
| SUCCp               | Succinate (Peroxisome)                                           |
| SUCCSAL             | Succinate semialdehyde                                           |
| SUCCSALm            | Succinate semialdehyde (Mitochondria)                            |
| SUCe                | Sucrose (Extracellular)                                          |

| Abbreviation      | Full name of metabolite                      |
|-------------------|----------------------------------------------|
| SUFT              | Sulfatide                                    |
| T3P1              | D-Glyceraldehyde 3-phosphate                 |
| T3P2              | Glycerone phosphate                          |
| T6P               | Tagatose-6-phosphate                         |
| TAGLY             | Triacylglycerol                              |
| TAR               | Tartrate                                     |
| TARE              | Tartrate                                     |
| TDP               | D-tagatose 1,6-bisphosphate                  |
| TGE               | Tagatose                                     |
| TGEe              | Tagatose (Extracellular)                     |
| TGLCOA            | Tigly CoA                                    |
| THDP              | Thiamine diphosphate                         |
| THF               | Tetrahydrofolate                             |
| THFG              | Tetrahydrofolyl-[Glu]                        |
| THFm              | Tetrahydrofolate (Mitochondria)              |
| THME              | Thiamine                                     |
| THMP              | Thiamine monophosphate                       |
| THPTGLU           | Tetrahydropteroyltri-L-glutamate             |
| THR               | L-Threonine                                  |
| THRe              | L-Threonine (Extracellular)                  |
| THRm              | L-Threonine (Mitochondria)                   |
| THY               | Thymine                                      |
| THZ               | 4-methyl-5-(2-hydroxyethyl)thiazole          |
| THZP              | 4-methyl-5-(2-phosphonooxyethyl)thiazole     |
| TPI               | D-myo-inositol 1,4,5-trisphosphate           |
| TPP               | Thiamine diphosphate                         |
| TR3DHT            | L-threo-3-deoxy-hexulose                     |
| TRE               | Alpha, alpha-Trehalose                       |
| TRE6P             | Alpha, alpha-Trehalose 6-phosphate           |
| TREe              | Alpha, alpha-Trehalose (Extracellular)       |
| TRMAS             | L-threo-3-methylaspartate                    |
| TRNA              | TRNA                                         |
| TRNA <sub>m</sub> | TRNA (Mitochondria)                          |
| TRP               | L-Tryptophan                                 |
| TRPe              | L-Tryptophan (Extracellular)                 |
| TRPM              | Tryptamine                                   |
| TRPTRNA           | L-Tryptophanyl-tRNA                          |
| TTGGP             | Trans, trans cis-geranyl geranyl diphosphate |
| TYR               | L-Tyrosine                                   |
| TYRe              | L-Tyrosine (Extracellular)                   |
| TYRm              | L-Tyrosine (Mitochondria)                    |
| UDP               | UDP                                          |
| UDPG              | UDPglucose                                   |
| UDPGAL            | UDPgalactose                                 |
| UDPGE             | UDP-glucuronate                              |
| UDPNAG            | UDP-N-acetyl-D-glucosamine                   |
| UDPNAGA           | UDP-N-acetyl-D-galactosamine                 |
| UGC               | Ureidoglycolate                              |
| UGCp              | Ureidoglycolate (Peroxisome)                 |
| UMP               | UMP                                          |
| UPGIII            | Uroporphyrinogen III                         |
| URA               | Uracil                                       |
| URAE              | Uracil (Extracellular)                       |

| <b>Abbreviation</b> | <b>Full name of metabolite</b> |
|---------------------|--------------------------------|
| URATEp              | Urate (Peroxisome)             |
| UREA                | Urea                           |
| UREAC               | Urea-1-carboxylate             |
| UREAp               | Urea (Peroxisome)              |
| UREIPRO             | N-carbamoyl- $\beta$ -alanine  |
| URI                 | Uridine                        |
| UROCA               | Urocanate                      |
| UTP                 | UTP                            |
| VAL                 | L-Valine                       |
| VALe                | L-Valine (Extracellular)       |
| VALm                | L-Valine (Mitochondria)        |
| VEML                | Vermelone                      |
| VERA                | Versicolorin A                 |
| VERAL               | Versiconal                     |
| VERB                | Versicolorin B                 |
| VESTINE             | Vestine                        |
| VHA                 | Versiconal hemiacetal acetate  |
| XAN                 | Xanthine                       |
| XANp                | Xanthine (Peroxisome)          |
| XMP                 | Xanthosine 5'-phosphate        |
| XOL                 | Xylitol                        |
| XOLe                | Xylitol (Extracellular)        |
| XTSINE              | Xanthosine                     |
| XUL                 | D-Xylulose                     |
| XUL5P               | D-Xylulose 5-phosphate         |
| XULe                | D-Xylulose (Extracellular)     |
| XYL                 | D-Xylose                       |
| XYLAN               | Xylan                          |
| XYLANe              | Xylan (Extracellular)          |
| XYLe                | D-Xylose (Extracellular)       |
| ZYMST               | Zymosterol                     |

**Suppl. Table 3:** Macromolecular composition (Biomass formation) of *A. oryzae*. The measured values are from Pedersen et al. (1999) where *A. oryzae* (A1560, wild type strain) grown on glucose and ammonia for a growth rate of 0.10 1/h and a specific glucose uptake rate of 1.12 mmol glucose/(g DW.h). For Glycogen, the measured value is from Debois et al. (1995). For Glucan and Chitin, the measured values are from Pedersen et al. (1996).

| <b>Biomass component</b> | <b>%[g/g]</b> | <b>%[mol/mol]</b> | <b>Average MW<br/>[g/mol of<br/>monomers in<br/>polymer]</b> | <b>Stoichiometric<br/>coefficient<br/>[mmol/ g DW]</b> |
|--------------------------|---------------|-------------------|--------------------------------------------------------------|--------------------------------------------------------|
| <b>Proteins</b>          | 40.0          | 71.24             | 134.58                                                       | 3.50075                                                |
| <b>Carbohydrates</b>     | 28.0          |                   |                                                              |                                                        |
| Glycogen                 | 0.1           | 0.04              | 666.6                                                        | 0.00212                                                |
| Chitin                   | 7.0           | 8.29              | 203.2                                                        | 0.40759                                                |
| Glucan                   | 20.8          | 30.82             | 162.1                                                        | 1.51453                                                |
| <b>RNA</b>               | 5.3           | 3.72              | 341.9                                                        | 0.18259                                                |
| <b>DNA</b>               | 0.8           | 0.58              | 332.3                                                        | 0.02836                                                |
| <b>Lipids</b>            | 6.8           | 2.09              | 780.43                                                       |                                                        |
| <i>Neutral Lipids</i>    |               |                   |                                                              |                                                        |
| Triacylglycerol          | 2.12          | 0.53              | 954.96                                                       | 0.02617                                                |
| <i>Free fatty acids</i>  | 0.35          | 0.28              | 301.31                                                       | 0.01365                                                |
| <i>Phospholipids</i>     |               |                   |                                                              |                                                        |
| Phosphatidylethanolamine | 0.97          | 0.30              | 782.50                                                       | 0.01468                                                |
| Phosphatidylcholine      | 2.38          | 0.68              | 834.80                                                       | 0.03356                                                |
| Phosphatidylserine       | 0.40          | 0.11              | 827.32                                                       | 0.00564                                                |
| Phosphatidylamine        | 0.58          | 0.18              | 755.24                                                       | 0.00903                                                |
| <b>D-Mannitol</b>        | 3.3           | 4.34              | 182.2                                                        | 0.21333                                                |
| <b>Glycerol</b>          | 0.7           | 1.82              | 92.1                                                         | 0.08952                                                |
| <b>Ash</b>               | 15.1          | -                 | -                                                            | -                                                      |

Average MW of biomass (g/mol) = 239.68

Elemental biomass composition =  $\text{CH}_{1.5}\text{O}_{0.53}\text{N}_{0.19}\text{P}_{0.005}\text{S}_{0.01}$

MW on C-mole (g/C-mol) = 25.1

**Suppl. Table 4:** Protein composition of *A. oryzae*. The measured values are from Pedersen et al. (1999).

| <b>Amino acid type</b>                 | <b>MW [g/mol]</b> | <b>Composition [%mol]</b> | <b>Composition [% (g/g)]</b> |
|----------------------------------------|-------------------|---------------------------|------------------------------|
| Alanine                                | 89.1              | 9.5                       | 6.6                          |
| Arginine                               | 174.2             | 4.4                       | 6.0                          |
| Asparagine                             | 132.1             | 4.6                       | 4.7                          |
| Aspartate                              | 133.1             | 4.6                       | 4.8                          |
| Cysteine                               | 121.2             | 1.1                       | 1.0                          |
| Glutamate                              | 147.1             | 8                         | 9.2                          |
| Glutamine                              | 146.1             | 8                         | 9.1                          |
| Glycine                                | 75.1              | 9.4                       | 5.5                          |
| Histidine                              | 155.2             | 2                         | 2.4                          |
| Isoleucine                             | 131.2             | 4.5                       | 4.6                          |
| Leucine                                | 131.2             | 6.9                       | 7.1                          |
| Lysine                                 | 146.2             | 5.7                       | 6.5                          |
| Methionine                             | 149.2             | 1.4                       | 1.6                          |
| Phenylalanine                          | 165.2             | 3.1                       | 4.0                          |
| Proline                                | 115.1             | 4.7                       | 4.2                          |
| Serine                                 | 105.1             | 6.6                       | 5.4                          |
| Threonine                              | 119.1             | 4.8                       | 4.5                          |
| Tryptophan                             | 204.2             | 1.8                       | 2.9                          |
| Tyrosine                               | 181.2             | 2.8                       | 4.0                          |
| Valine                                 | 117.1             | 6.4                       | 5.9                          |
| Average MW of protein (g/mol) = 134.58 |                   |                           |                              |

**Suppl. Table 5:** DNA composition of *A. oryzae*. The measured values are from Pedersen et al. (1999).

| <b>dNTP type</b> | <b>MW<br/>[g/mol]</b> | <b>Composition<br/>[% (mol)]</b> | <b>Composition<br/>[% (g/g)]</b> |
|------------------|-----------------------|----------------------------------|----------------------------------|
| dAMP             | 349.2                 | 24.2                             | 25.51                            |
| dTMP             | 322.2                 | 24.2                             | 23.53                            |
| dGMP             | 347.2                 | 25.8                             | 27.04                            |
| dCMP             | 307.2                 | 25.8                             | 23.92                            |

Average MW of DNA (g/mol) = 332.3

**Remark:** Assuming the same composition in NTP and NMP



**Suppl. Table 6:** RNA composition of *A. oryzae*. The measured values are from Pedersen et al. (1999).

| <b>NTP type</b> | <b>MW<br/>[g/mol]</b> | <b>Composition<br/>[% (mol)]</b> | <b>Composition<br/>[% (g/g)]</b> |
|-----------------|-----------------------|----------------------------------|----------------------------------|
| AMP             | 347.2                 | 25.6                             | 26.1                             |
| UMP             | 324.2                 | 26.2                             | 24.9                             |
| GMP             | 363.2                 | 28.6                             | 30.5                             |
| CMP             | 323.2                 | 19.6                             | 18.6                             |

Average MW of RNA (g/mol) = 341.9

**Remark** Assuming the same composition in NTP and NMP

**Suppl. Table 7:** Lipid composition of *A. oryzae*. The measured values are from Sakuradani et. al (1999).

| <b>Lipid type</b>                           | <b>Average MW<br/>[g/mol]</b> | <b>Composition<br/>[%mol]</b> | <b>Composition<br/>[% (g/g)]</b> |
|---------------------------------------------|-------------------------------|-------------------------------|----------------------------------|
| Triacylglycerol                             | 954.96                        | 25.50                         | 31.20                            |
| Free fatty acids                            | 301.31                        | 13.3                          | 5.13                             |
| Phosphatidylethanolamine                    | 782.50                        | 14.3                          | 14.34                            |
| Phosphatidylcholine                         | 834.80                        | 32.7                          | 34.98                            |
| Phosphatidylserine                          | 827.32                        | 5.5                           | 5.83                             |
| Phosphatidylamine                           | 755.24                        | 8.8                           | 8.52                             |
| Average MW of total lipids (g/mol) = 780.43 |                               |                               |                                  |

**Suppl. Table 8:** Triacylglycerol composition of *A. oryzae*. The measured values are from Sakuradani et. al (1999).

| <b>Fatty acids</b> | <b>MW [g/mol]</b> | <b>Composition [%mol]</b> | <b>% [mol/100 mol of total fatty acids in lipid]</b> |
|--------------------|-------------------|---------------------------|------------------------------------------------------|
| C16:0              | 239.2             | 47.10                     | 11.8                                                 |
| C16:1              | 237.2             | 2.42                      | 0.6                                                  |
| C18:0              | 267.5             | 15.35                     | 4.3                                                  |
| C18:1              | 265.3             | 53.28                     | 14.8                                                 |
| C18:2              | 263.2             | 233.62                    | 64.4                                                 |
| C18:3              | 261.2             | 14.99                     | 4.1                                                  |

**Suppl. Table 9:** Phospholipid composition of *A. oryzae*. The measured values are from Sakuradani et. al (1999).

| <b>Fatty acids</b> | <b>MW [g/mol]</b> | <b>Composition [%mol]</b> | <b>% [mol/100 mol of total fatty acids in lipid]</b> |
|--------------------|-------------------|---------------------------|------------------------------------------------------|
| C16:0              | 239.2             | 58.56                     | 17.3                                                 |
| C16:1              | 237.2             | 1.44                      | 0.4                                                  |
| C18:0              | 267.5             | 5.43                      | 1.8                                                  |
| C18:1              | 265.3             | 42.61                     | 13.9                                                 |
| C18:2              | 263.2             | 197.54                    | 64.2                                                 |
| C18:3              | 261.2             | 7.44                      | 2.4                                                  |

**Suppl. Table 10:** Free fatty acid composition of *A. oryzae*. The measured values are from Sakuradani et al. (1999).

| <b>Fatty acids</b> | <b>MW [g/mol]</b> | <b>Composition [%mol]</b> | <b>% [mol/100 mol of total fatty acids in lipid]</b> |
|--------------------|-------------------|---------------------------|------------------------------------------------------|
| C16:0              | 239.2             | 27.20                     | 21.6                                                 |
| C16:1              | 237.2             | 0.51                      | 0.4                                                  |
| C18:0              | 267.5             | 3.04                      | 2.7                                                  |
| C18:1              | 265.3             | 15.34                     | 13.5                                                 |
| C18:2              | 263.2             | 66.73                     | 58.3                                                 |
| C18:3              | 261.2             | 4.04                      | 3.5                                                  |

## References:

### Books, paper publications and databases are applied for genome-scale reconstruction

Brown, D.W., Yu, J.H., Kelkar, H.S., Fernandes, M., Nesbitt, T.C., Keller, N.P., Adams, T.H., and Leonard, T.J: **Twenty-five coregulated transcripts define a sterigmatocystin gene cluster in *Aspergillus nidulans***. *PNAS* 1996, **93**: 1418-1422.

Carlsen M., Nielsen J., Villadsen J: **Growth and alpha-amylase production by *Aspergillus oryzae* during continuous cultivations**. *Journal of Biotechnology* 1996, 81-93.

David H, Hofmann G, Oliveira A.P, Jarmer H, Nielsen J: **Metabolic network driven analysis of genome-wide transcription data from *Aspergillus nidulans***. *Genome Biology* 2006, **7** (11).

David H, Akesson M, Nielsen J: **Reconstruction of the central carbon metabolism of *Aspergillus niger***. *European Journal of Biochemistry* 2003, **270**: 4243-4253.

Debois, M., Heydorn, A., Obel, N: **Macromolecule analysis of *Aspergillus oryzae***. *Master Thesis* 1995, Technical University of Denmark.

Forster J, Famili I, Fu P, Palsson B.O, Nielsen J: **Genome-scale reconstruction of the *Saccharomyces cerevisiae* metabolic network**. *Genome Research* 2003, **13**:244-253.

Machida M, Asai K, Sano M, Tanaka T, Kumagai T, Terai G, Kusumoto KI, Arima T, Akita O, Kashiwagi Y *et al*: **Genome sequencing and analysis of *Aspergillus oryzae***. *Nature* 2005, **438**:1157-1161.

McMurry, J. and Begley, T: **The Organic Chemistry of Biological Pathways**. *Englewood* 2005, CO: Roberts and Co. Publishers.

Pedersen H, Carlsen M, Nielsen J: **Identification of enzymes and quantification of metabolic fluxes in the wild type and in a recombinant *Aspergillus oryzae* strain**. *Applied and Environmental Microbiology* 1999, **65**:11-19.

Pedersen, H: **Metabolic flux in *Aspergillus oryzae***. *Master Thesis* 1996, Technical University of Denmark.

Sakuradani, E, Kobayashi M, Shimizu S: **Delta 9-fatty acid desaturase from arachidonic acid producing fungus**. *European Journal of Biochemistry* 1999, **260**: 208-216.

Hilditch, S, Berghäll, S, Kalkkinen, N, Penttilä, M, Richard, P: **The missing link in the fungal D-galacturonate pathway; Identification of the L-threo-3-deoxyhexulose aldolase**. *Journal of Biological Chemistry* 2007, 1-16.

Tsai, H.F., Fujii, I., Watanabe, A., Wheeler, A.H., Chang, Y.C., Yasuoka, Y., Ebizuka, Y. and Kwon-Chung, K.J: **Pentaketide melanin biosynthesis in *Aspergillus fumigatus* requires chain-length shortening of a heptaketide precursor.** *Journal of Biological Chemistry* 2001, **276**: 29292-29298.

***Aspergillus oryzae* genome database**

[[http://www.bio.nite.go.jp/dogan/MicroTop?GENOME\\_ID=ao](http://www.bio.nite.go.jp/dogan/MicroTop?GENOME_ID=ao)]

**BioCyc pathway database**

[<http://biocyc.org/server.html>]

**Comparative genome analysis database:**

[<http://ergo.integratedgenomics.com/ERGO>]

**KEGG pathway database:**

[<http://www.kegg.com>]
